# Supplementary material for: A Repertory of Rearrangements and the Loss of an Inverted Repeat Region in Passiflora Chloroplast Genomes
Source: PubMed Central journal article supplement — Genome Biol Evol. 2020 Jul 28;12(10):1841–57. doi: 10.1093/gbe/evaa155 (PMC7586853; doi:10.1093/gbe/evaa155), 2020-07-28
Supplement: evaa155_supplementary_data.pdf [file evaa155_supplementary_data.pdf]

**Supplementary Table S1** List of *Passiflora* species, locality of collection, and methodological analyses in which they were included.

| <b>Subgenus</b>            | <b>Species</b>                  | <b>Locality of collection</b>           | <b>Mauve first alignment</b> | <b>Mauve second alignment</b> | <b>IR expansion analysis</b> |
|----------------------------|---------------------------------|-----------------------------------------|------------------------------|-------------------------------|------------------------------|
| <b><i>Astrophea</i></b>    | <i>Passiflora cerradensis</i>   | Juara (Mato Grosso)                     | X                            | X                             | X                            |
|                            | <i>Passiflora haematostigma</i> | São Bento (Rio Grande do Sul)           | X                            | X                             | X                            |
|                            | <i>Passiflora rhamnifolia</i>   | Palmeiras (Bahia)                       | X                            | X                             | X                            |
| <b><i>Decaloba</i></b>     | <i>Passiflora candollei</i>     | Alta Floresta (Mato Grosso)             | X                            | X                             | X                            |
|                            | <i>Passiflora capsularis</i>    | Ribeirão Grande (São Paulo)             | X                            | X                             | X                            |
|                            | <i>Passiflora costaricensis</i> | Costa Rica, Central America **          | X                            | X                             | X                            |
|                            | <i>Passiflora suberosa</i>      | Piracicaba (São Paulo)                  | X                            | X                             | X                            |
|                            | <i>Passiflora vespertilio</i>   | Alta Floresta (Mato Grosso)             | X                            | X                             | X                            |
| <b><i>Deidamioides</i></b> | <i>Passiflora contracta</i>     | Ituberá (Bahia)                         | X                            | X                             | X                            |
|                            | <i>Passiflora deidamioides</i>  | Paranapiacaba (São Paulo)               | X                            | X                             | X                            |
| <b><i>Passiflora</i></b>   | <i>Passiflora alata</i>         | Piracicaba (São Paulo)                  | X                            | X                             | X                            |
|                            | <i>Passiflora cristalina</i>    | Alta Floresta (Mato Grosso)             |                              | X                             |                              |
|                            | <i>Passiflora edmundoi</i>      | Palmeiras (Bahia)                       |                              | X                             |                              |
|                            | <i>Passiflora loefgrenii</i>    | Ribeirão Grande (São Paulo)             |                              | X                             |                              |
|                            | <i>Passiflora miniata</i>       | Alta Floresta (Mato Grosso)             |                              | X                             |                              |
|                            | <i>Passiflora mucronata</i>     | Itacaré (Bahia)                         |                              | X                             |                              |
|                            | <i>Passiflora recurva</i>       | Palmeiras (Bahia)                       |                              | X                             |                              |
|                            | <i>Passiflora watsoniana</i>    | Palmeiras (Bahia)                       |                              | X                             |                              |
| <b><i>Dilkea</i></b>       | <i>Dilkea retusa</i>            | Santarém (Pará)                         | X                            | X                             | X                            |
|                            |                                 | Ribas do Rio Pardo (Mato Grosso do Sul) | X                            | X                             | X                            |
| <b><i>Mitostemma</i></b>   | <i>Mitostemma brevifilis</i>    |                                         | X                            | X                             | X                            |

\* The names of the Brazilian states are given within brackets

\*\* Species obtained from the Italian National Collection of *Passiflora*

**Supplementary Table S2** Assembly report of the *Passiflora* chloroplast genomes as well as of *Dilkea retusa* and *Mitostemma brevifilis*.

| Species                         | Illumina Sequencing | Total reads | Seed sequence | K-mer size | NOVOPlasty     |          |                     | Geneious          |              |          |                    |
|---------------------------------|---------------------|-------------|---------------|------------|----------------|----------|---------------------|-------------------|--------------|----------|--------------------|
|                                 |                     |             |               |            | No. of contigs | N50 (bp) | Largest contig (bp) | Final contig (bp) | Mapped reads | Coverage | Standard deviation |
| <i>Passiflora cerradensis</i>   | 2 × 150             | 22,754,226  | <i>psba</i>   | 27         | 8              | 95,494   | 95,494              | 164,515           | 312,931      | 273,6    | 42,4               |
| <i>Passiflora haematostigma</i> | 2 × 150             | 17,430,270  | <i>psba</i>   | 33         | 4              | 66,798   | 78,410              | 163,775           | 495,185      | 406,5    | 83,7               |
| <i>Passiflora rhamnifolia</i>   | 2 × 76              | 41,545,758  | <i>psba</i>   | 33         | 1              | 162,217  | 162,217             | 162,217           | 3,159,608    | 1459,1   | 416,1              |
| <i>Passiflora candollei</i>     | 2 × 150             | 17,418,848  | <i>psba</i>   | 25         | 3              | 78,011   | 78,011              | 138,081           | 610,704      | 596,8    | 99,3               |
| <i>Passiflora capsularis</i>    | 2 × 150             | 20,764,460  | <i>psba</i>   | 33         | 3              | 98,968   | 98,968              | 113,114           | 1,385,507    | 1678,6   | 265,7              |
| <i>Passiflora suberosa</i>      | 2 × 76              | 39,288,936  | <i>psba</i>   | 23         | 7              | 50,453   | 64,935              | 158,313           | 3,500,674    | 1668,4   | 354,6              |
| <i>Passiflora vespertilio</i>   | 2 × 150             | 24,924,420  | <i>psba</i>   | 33         | 4              | 83,679   | 83,679              | 138,456           | 1,469,520    | 1455,2   | 214,5              |
| <i>Passiflora contracta</i>     | 2 × 76              | 40,087,112  | <i>rpoB</i>   | 35         | 12             | 52,316   | 58,232              | 166,558           | 1,323,274    | 589,5    | 114,6              |
| <i>Passiflora deidamioides</i>  | 2 × 76              | 39,856,504  | <i>rbcL</i>   | 25         | 6              | 64,351   | 70,361              | 167,953           | 2,337,851    | 1034,3   | 244,6              |
| <i>Passiflora alata</i>         | 2 × 76              | 34,408,974  | <i>psba</i>   | 25         | 10             | 62,093   | 64,622              | 147,773           | 591,986      | 297,3    | 69,4               |
| <i>Passiflora cristalina</i>    | 2 × 150             | 22,320,626  | <i>rbcL</i>   | 33         | 3              | 112,944  | 112,944             | 145,054           | 203,402      | 190,5    | 30,7               |
| <i>Passiflora edmundoi</i>      | 2 × 150             | 22,450,584  | <i>psba</i>   | 25         | 4              | 63,137   | 66,405              | 142,737           | 846,246      | 801,3    | 134                |
| <i>Passiflora loefgrenii</i>    | 2 × 76              | 38,113,682  | <i>psba</i>   | 33         | 2              | 81,924   | 81,924              | 146,537           | 5,879,056    | 2977,3   | 586,3              |
| <i>Passiflora miniata</i>       | 2 × 150             | 13,862,202  | <i>psba</i>   | 39         | 5              | 46,879   | 67,475              | 151,920           | 197,290      | 174,7    | 37,4               |
| <i>Passiflora mucronata</i>     | 2 × 150             | 20,276,596  | <i>psba</i>   | 23         | 6              | 38,580   | 66,292              | 150,839           | 802,974      | 719,6    | 112,4              |
| <i>Passiflora recurva</i>       | 2 × 150             | 17,888,470  | <i>rbcL</i>   | 23         | 5              | 40,041   | 67,107              | 151,837           | 670,343      | 598,4    | 108                |
| <i>Passiflora watsoniana</i>    | 2 × 150             | 16,526,196  | <i>rbcL</i>   | 39         | 5              | 37,941   | 71,878              | 146,520           | 227,824      | 209,7    | 36,7               |
| <i>Dilkea retusa</i>            | 2 × 150             | 21,899,744  | <i>rbcL</i>   | 27         | 6              | 54,747   | 60,013              | 161,923           | 117,425      | 98,6     | 17,5               |
| <i>Mitostemma brevifilis</i>    | 2 × 150             | 23,891,314  | <i>psba</i>   | 39         | 6              | 135,027  | 135,027             | 163,032           | 1,652,427    | 1379,1   | 207,3              |

  

| Species                         | PacBio Seq | Total reads | Mean read length | Canu           |       |         | Geneious       |              |          |                    |
|---------------------------------|------------|-------------|------------------|----------------|-------|---------|----------------|--------------|----------|--------------------|
|                                 |            |             |                  | No. of contigs | N50   | Largest | No. of contigs | Final contig | Coverage | Standard deviation |
| <i>Passiflora costaricensis</i> | 1,1 Gb     | 247,741     | 4,441 bp         | 4,322*         | 7,061 | 61,771  | 4              | 114,230 bp   | 538      | 115                |

\*The high number of contigs and small N50 were a result of nuclear contamination in the chloroplast sample.

**Supplementary Table S3** PCR primers used to confirm the chloroplast DNA sequence in five *Passiflora* species.

| <b>Species</b>                  | <b>Region within the chloroplast genome</b> | <b>Primer code</b> | <b>Primer sequence 5'-3'</b> |
|---------------------------------|---------------------------------------------|--------------------|------------------------------|
| <i>Passiflora capsularis</i>    | <i>ndhB - psbA</i>                          | Pcap1_F            | ACCCCTCACGTGCGAAATTA         |
|                                 | <i>ndhB - psbA</i>                          | Pcap1_R            | ACCGTCCGAAAAGCTTCCTT         |
|                                 | <i>rps15 - rrna5</i>                        | Pcap21_F           | AGATAGTAGTCGTCGGCGTT         |
|                                 | <i>rps15 - rrna5</i>                        | Pcap21_R           | GGGAAGTCCTGCGGAAAAA          |
|                                 | <i>rps15 - rrna5</i>                        | Pcap22_F           | TCCATTAAACCAAGGCCGGT         |
|                                 | <i>rps15 - rrna5</i>                        | Pcap22_R           | TCCTAGGCGTAGAGGAACCA         |
|                                 | <i>rps15 - rrna5</i>                        | Pcap23_F           | TCTGACTCCCGAATATCCAATTTAC    |
|                                 | <i>rps15 - rrna5</i>                        | Pcap23_R           | GCTCAGGTTTATATTGGCAGCA       |
|                                 | <i>ndhF - rpl23</i>                         | Pcap31_F           | GACACCAAAGAAGAGTTCGGC        |
|                                 | <i>ndhF - rpl23</i>                         | Pcap31_R           | GAATTACCAATGGGGTTCGGC        |
|                                 | <i>ndhF - rpl23</i>                         | Pcap32_F           | CGGCCCAATGCTTTATTTCTGT       |
|                                 | <i>ndhF - rpl23</i>                         | Pcap32_R           | CCCCTTCGGTAACTCGTTCT         |
|                                 | <i>ndhF - rpl23</i>                         | Pcap33_F           | GCACTAGCGTTGGTAATGTGG        |
|                                 | <i>ndhF - rpl23</i>                         | Pcap33_R           | GCCTTTTCTTTCTATAAGCCGGT      |
|                                 | <i>rps11 - rpoA</i>                         | Pcap4_F            | TGATTCCTTGCCCTGGCTTC         |
|                                 | <i>rps11 - rpoA</i>                         | Pcap4_R            | GCCGATTTAAGGGACCACGA         |
| <i>Passiflora costaricensis</i> | <i>rps11 - ndhF</i>                         | Pcost1_F           | GTTTCGCAAGAAAGGCGGTT         |
|                                 | <i>rps11 - ndhF</i>                         | Pcost1_R           | CGGCAGCCGTATCTCTTCTT         |
|                                 | <i>rpoA - rpl23</i>                         | Pcost2_F           | CTTGCCCTGGCTTCAGGTTA         |
|                                 | <i>rpoA - rpl23</i>                         | Pcost2_R           | ACCCGGTTGAAGCGTAATGA         |
|                                 | <i>rps15 - rrn5</i>                         | Pcost3_F           | GGAACAAGCGCTCGTATCTTT        |
|                                 | <i>rps15 - rrn5</i>                         | Pcost3_R           | ACTGTAGGGGAAGTCCTGCG         |
|                                 | <i>ndhB - psbA</i>                          | Pcost4_F           | TAACCCCTCACGTGCGAAAT         |
|                                 | <i>ndhB - psbA</i>                          | Pcost4_R           | ACCGTCCGAAAAGCTTCCTT         |
| <i>Passiflora cerradensis</i>   | <i>matK - rpl23</i>                         | Pcerra_F           | CGGGAGTCGATGGCTATGAA         |
|                                 | <i>matK - rpl23</i>                         | Pcerra_R           | ACTCCCGAAACATAAGTGGGT        |
| <i>Passiflora deidamioides</i>  | <i>psbK - rpl23</i>                         | Pdeid_F            | ACCCGGTTGAAGCGTAATGA         |
|                                 | <i>psbK - rpl23</i>                         | Pdeid_R            | ATGCCAGTAATCCCCCTGTTC        |
| <i>Passiflora vespertilio</i>   | <i>ndhF - rpl2</i>                          | Pvesp1_F           | GCCAGATGAAGGAACGGGAA         |
|                                 | <i>ndhF - rpl2</i>                          | Pvesp1_R           | GAATTACCAATGGGTTTCGGCA       |
|                                 | <i>rps15 - rpl2</i>                         | Pvesp2_F           | TAGTAGTCGTCGGCGTTTTTCT       |
|                                 | <i>rps15 - rpl2</i>                         | Pvesp2_R           | AACCCTGTAGACCATCCCCAT        |
|                                 | <i>rrn5 - rps19</i>                         | Pvesp3_F           | TCCTAGGCGTAGAGGAACCA         |
|                                 | <i>rrn5 - rps19</i>                         | Pvesp3_R           | TTCTCCCAATTTATGACCCACCA      |

**Supplementary Table S4** List of chloroplast genomes of *Passiflora* species available in Genbank database as well as of *Adenia mannii* and *Populus trihocarpa*.

| <b>Subgenus</b>     | <b>Species</b>                    | <b>Genbank accession number</b> |
|---------------------|-----------------------------------|---------------------------------|
| <i>Astrophea</i>    | <i>Passiflora pittieri</i>        | NC_038125.1                     |
| <i>Decaloba</i>     | <i>Passiflora microstipula</i>    | NC_043827.1                     |
|                     | <i>Passiflora auriculata</i>      | NC_038119.1                     |
|                     | <i>Passiflora jatunsachensis</i>  | NC_043813.1                     |
|                     | <i>Passiflora rufa</i>            | NC_043817.1                     |
|                     | <i>Passiflora tenuiloba</i>       | NC_043816.1                     |
|                     | <i>Passiflora filipes</i>         | NC_043822.1                     |
|                     | <i>Passiflora lutea</i>           | NC_043815.1                     |
|                     | <i>Passiflora affinis</i>         | NC_043823.1                     |
|                     | <i>Passiflora biflora</i>         | NC_038120.1                     |
|                     | <i>Passiflora misera</i>          | NC_043821.1                     |
| <i>Deidamioides</i> | <i>Passiflora arbelaezii</i>      | NC_043819.1                     |
|                     | <i>Passiflora obovata</i>         | NC_043824.1                     |
| <i>Tetraphatea</i>  | <i>Passiflora tetrandra</i>       | NC_043820.1                     |
| <i>Passiflora</i>   | <i>Passiflora actinia</i>         | NC_038118.1                     |
|                     | <i>Passiflora quadrangularis</i>  | NC_038126.1                     |
|                     | <i>Passiflora laurifolia</i>      | NC_038121.1                     |
|                     | <i>Passiflora nitida</i>          | NC_038123.1                     |
|                     | <i>Passiflora cincinnata</i>      | NC_037690.1                     |
|                     | <i>Passiflora edulis</i>          | NC_034285.1                     |
|                     | <i>Passiflora vitifolia</i>       | NC_038128.1                     |
|                     | <i>Passiflora ligularis</i>       | NC_038122.1                     |
|                     | <i>Passiflora serratodigitata</i> | NC_038127.1                     |
|                     | <i>Passiflora serratifolia</i>    | NC_038129.1                     |
|                     | <i>Passiflora menispermifolia</i> | NC_043826.1                     |
|                     | <i>Passiflora oerstedii</i>       | NC_038124.1                     |
|                     | <i>Passiflora retipetala</i>      | NC_038188.1                     |
|                     | <i>Passiflora foetida</i>         | NC_043825.1                     |
|                     | <i>Adenia mannii</i>              | NC_043791.1                     |
|                     | <i>Populus trihocarpa</i>         | NC_009143.1                     |

---

**Supplementary Table S5** List of 68 chloroplast protein-coding genes used in the phylogenetic analysis

---

**Chloroplast protein-coding genes**

---

*atpA, atpB, atpE, atpF, atpH, atpI, ccsA, cemA, clpP, matK, ndhA, ndhB, ndhC, ndhD, ndhE, ndhF, ndhG, ndhH, ndhI, ndhJ, ndhK, petA, petB, petD, petG, petL, petN, psaA, psaB, psaC, psaI, psaJ, psbA, psbB, psbC, psbD, psbE, psbF, psbH, psbI, psbJ, psbK, psbL, psbM, psbN, psbT, psbZ, rbcL, rpl2, rpl14, rpl16, rpl23, rpl33, rpl36, rpoB, rpoC1, rpoC2, rps2, rps3, rps4, rps8, rps11, rps12, rps14, rps15, rps19, ycf3, ycf4.*

---

**Supplementary Figure S1** Chloroplast genome maps of 18 *Passiflora* species in addition to the Passifloraceae, *Dilkea retusa* and *Mitostemma brevifilis*.

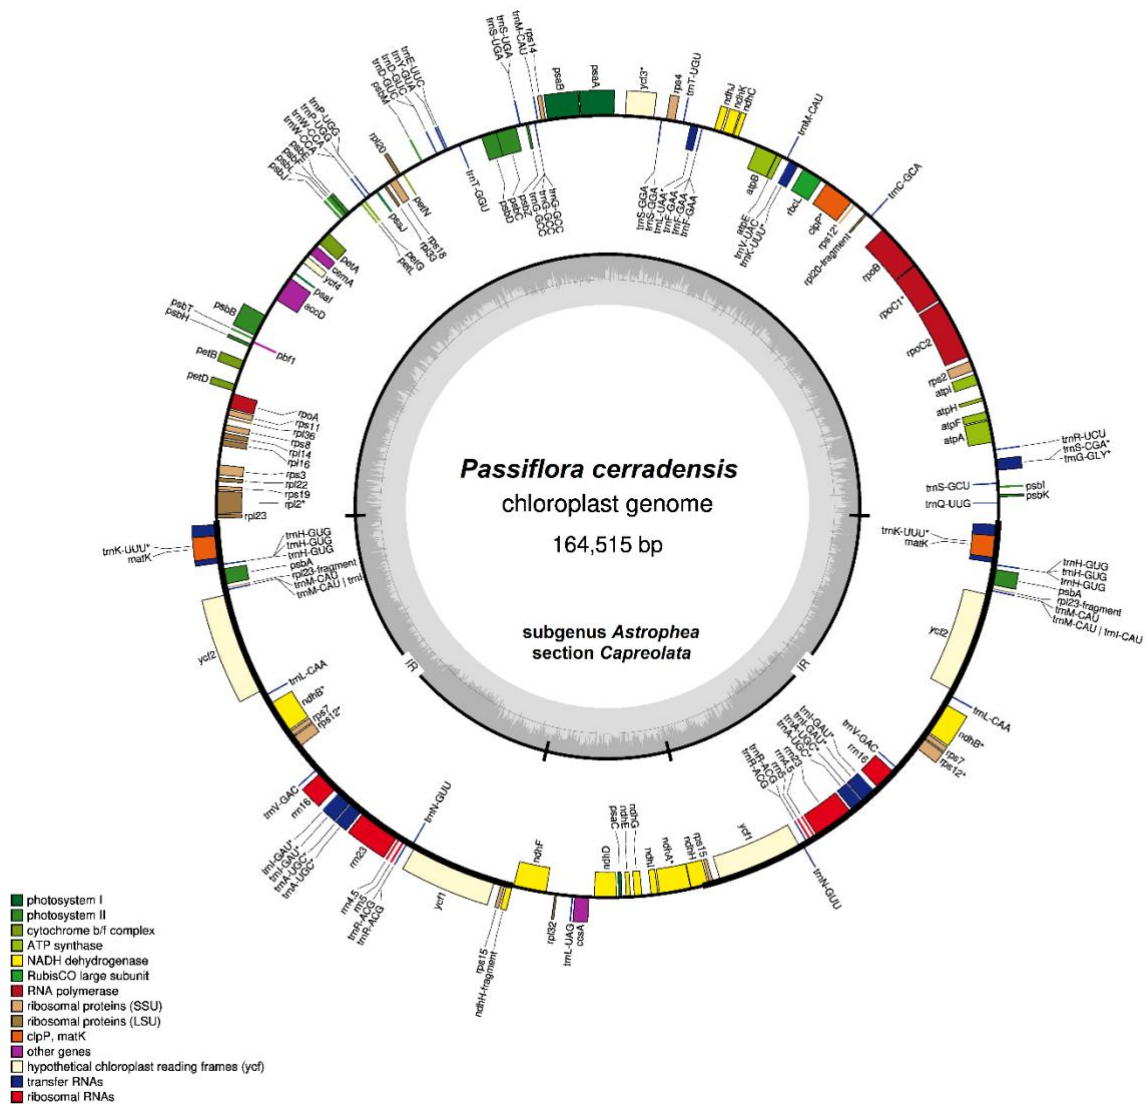

**A.** Chloroplast genome map of *Passiflora cerradensis*, subgenus *Astrophea*. Genes are represented as boxes inside or outside the large circle to indicate clockwise (inside) or counter clockwise (outside) transcription. The color of the gene boxes indicates the functional group to which the gene belongs. The thickened lines of the large circle indicate IR regions. The inner most circle denotes the GC content across the genome. LSC, large single-copy region; SSC, small single-copy region.

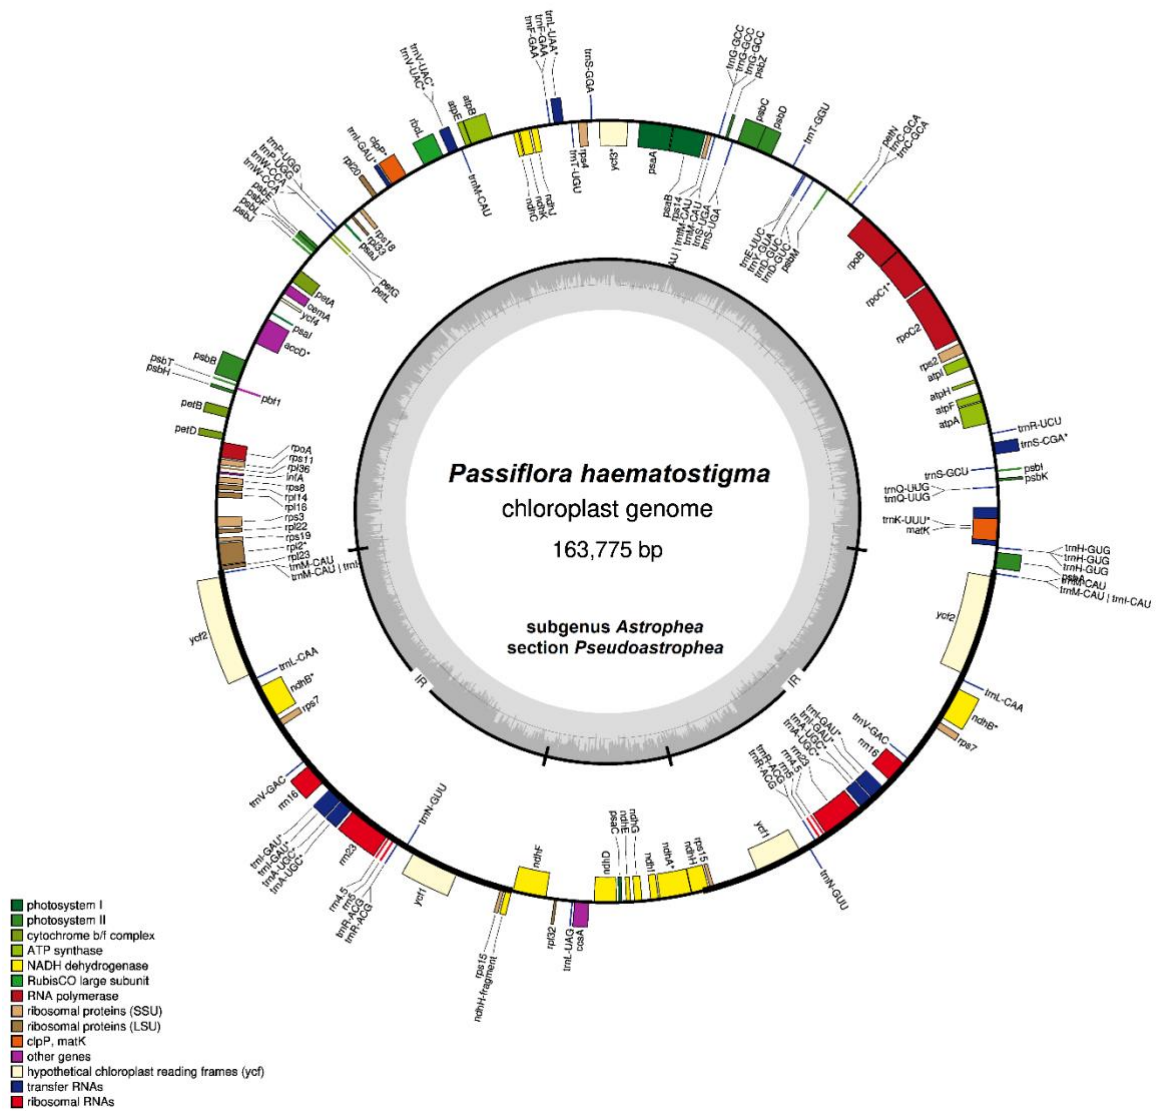

**B.** Chloroplast genome map of *Passiflora haematostigma*, subgenus *Astrophea*. Genes are represented as boxes inside or outside the large circle to indicate clockwise (inside) or counter clockwise (outside) transcription. The color of the gene boxes indicates the functional group to which the gene belongs. The thickened lines of the large circle indicate IR regions. The inner most circle denotes the GC content across the genome. LSC, large single-copy region; SSC, small single-copy region

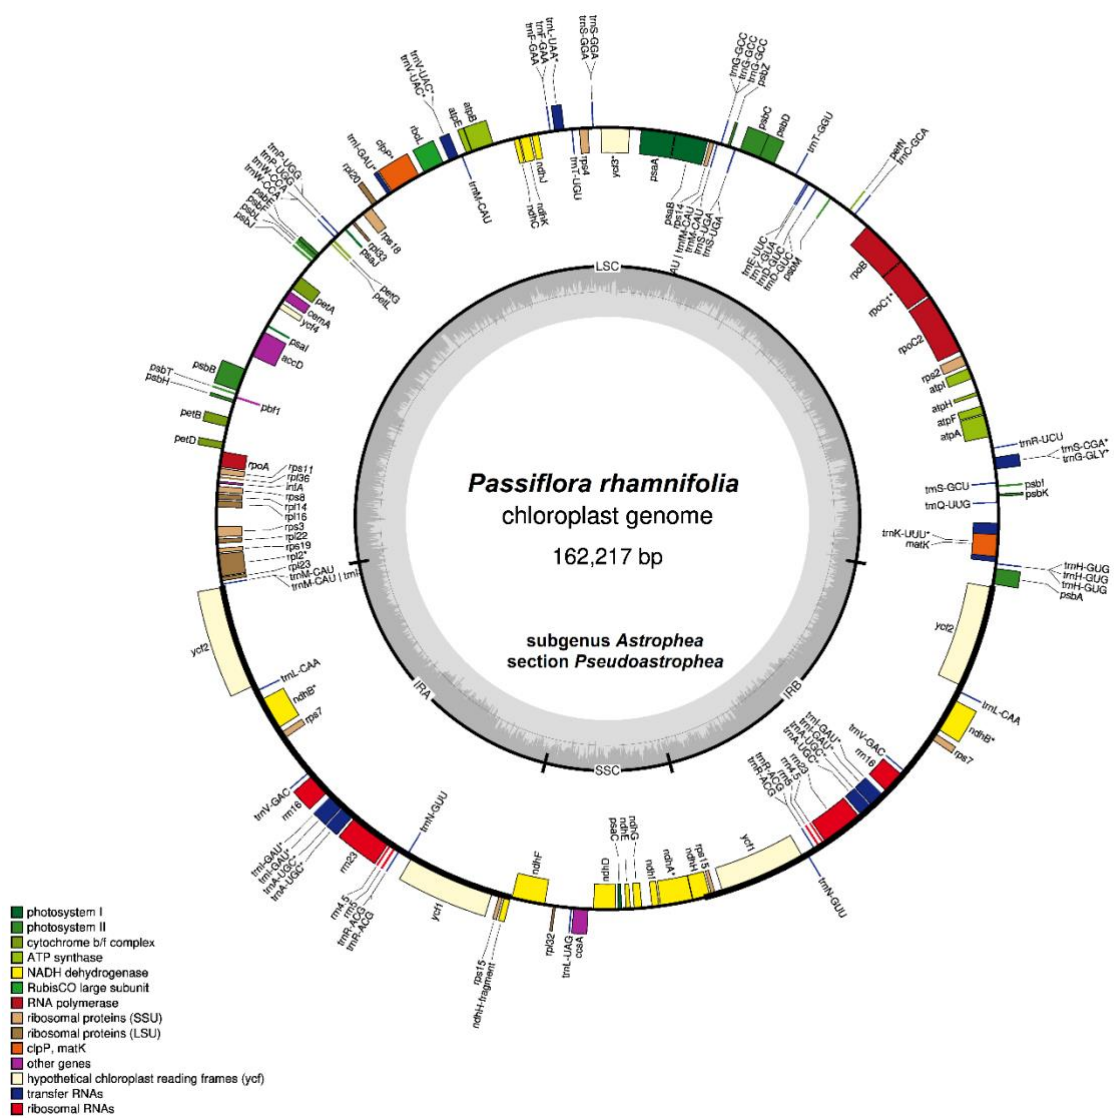

C. Chloroplast genome map of *Passiflora rhamnifolia*, subgenus *Astrophea*. Genes are represented as boxes inside or outside the large circle to indicate clockwise (inside) or counter clockwise (outside) transcription. The color of the gene boxes indicates the functional group to which the gene belongs. The thickened lines of the large circle indicate IR regions. The inner most circle denotes the GC content across the genome. LSC, large single-copy region; SSC, small single-copy region.



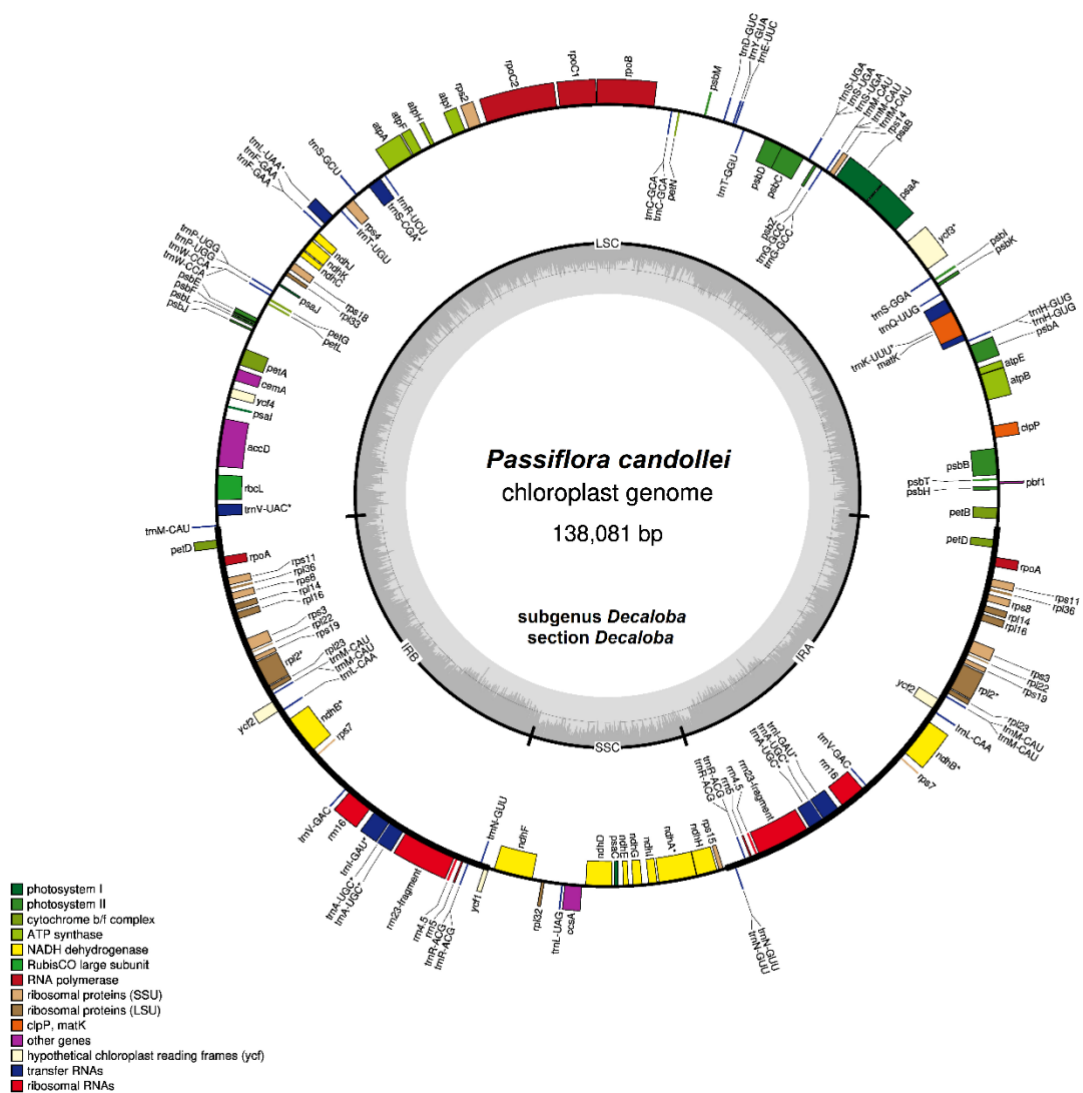

**D.** Chloroplast genome map of *Passiflora candollei*, subgenus *Decaloba*. Genes are represented as boxes inside or outside the large circle to indicate clockwise (inside) or counter clockwise (outside) transcription. The color of the gene boxes indicates the functional group to which the gene belongs. The thickened lines of the large circle indicate IR regions. The inner most circle denotes the GC content across the genome. LSC, large single-copy region; SSC, small single-copy region.

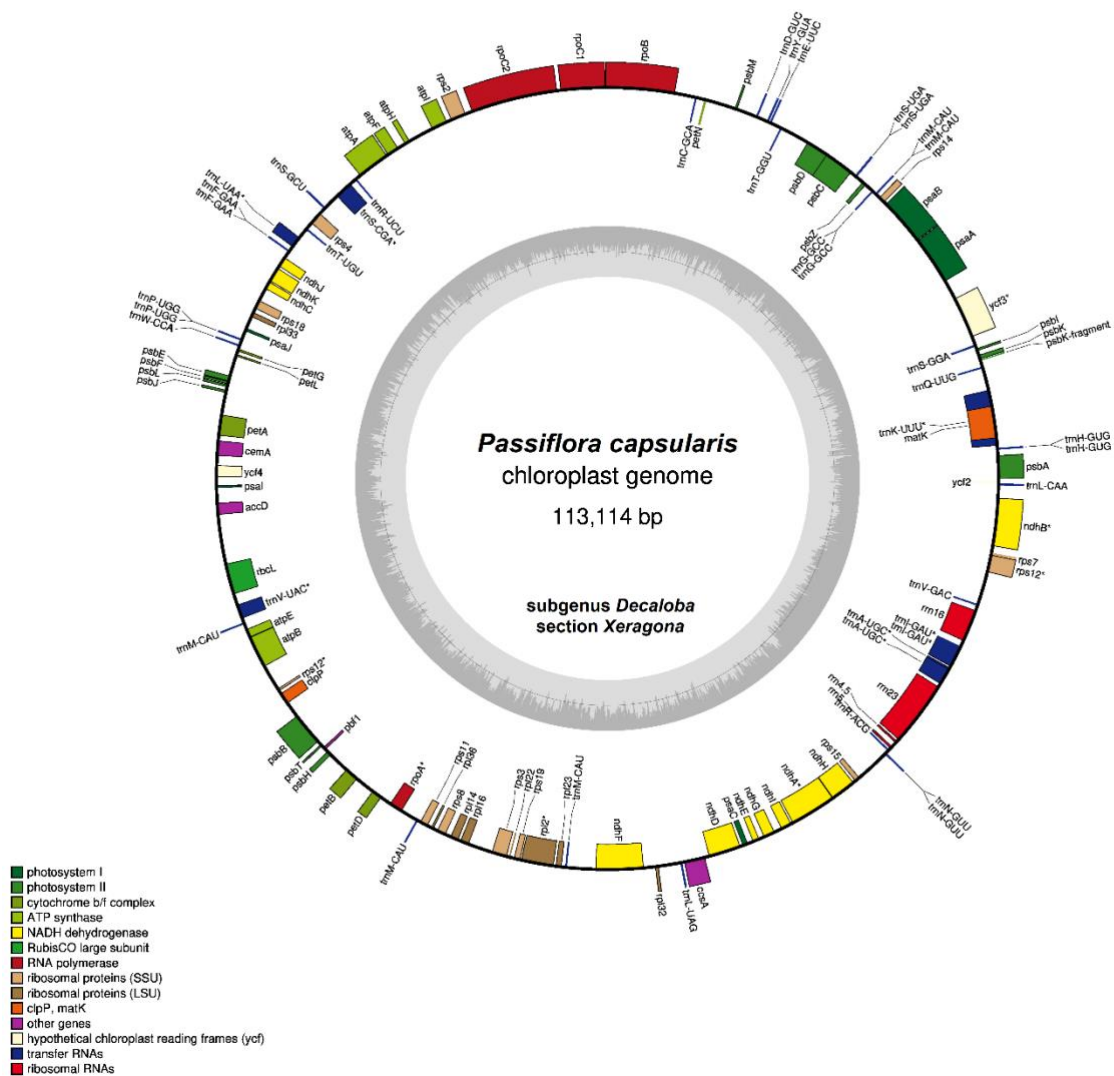

**E.** Chloroplast genome map of *Passiflora capsularis*, subgenus *Decaloba*. Genes are represented as boxes inside or outside the large circle to indicate clockwise (inside) or counter clockwise (outside) transcription. The color of the gene boxes indicates the functional group to which the gene belongs. The thickened lines of the large circle indicate IR regions. The inner most circle denotes the GC content across the genome. LSC, large single-copy region; SSC, small single-copy region.

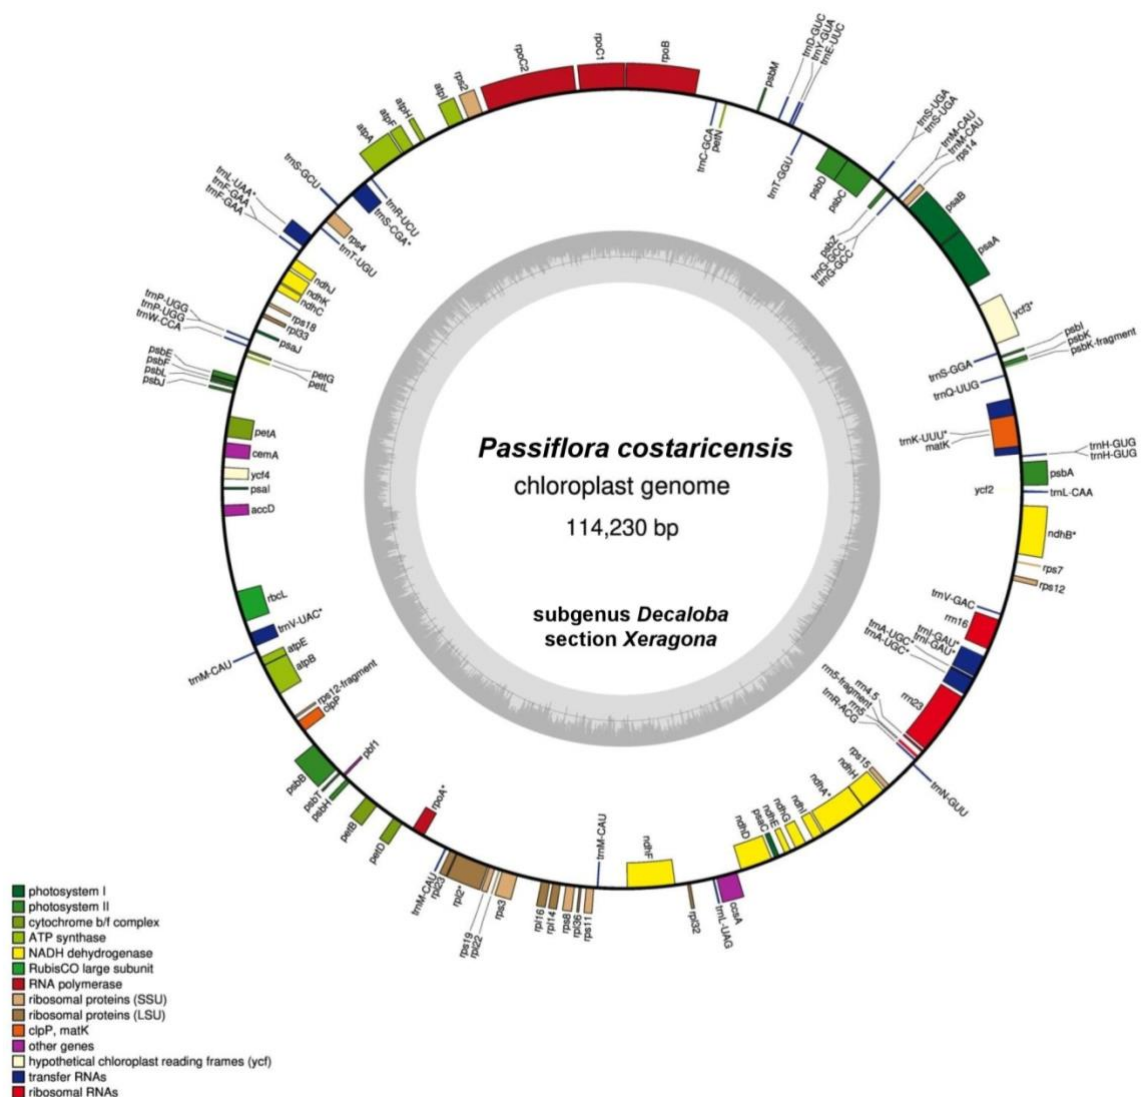

**F.** Chloroplast genome map of *Passiflora costaricensis*, subgenus *Decaloba*. Genes are represented as boxes inside or outside the large circle to indicate clockwise (inside) or counter clockwise (outside) transcription. The color of the gene boxes indicates the functional group to which the gene belongs. The thickened lines of the large circle indicate IR regions. The inner most circle denotes the GC content across the genome. LSC, large single-copy region; SSC, small single-copy region.

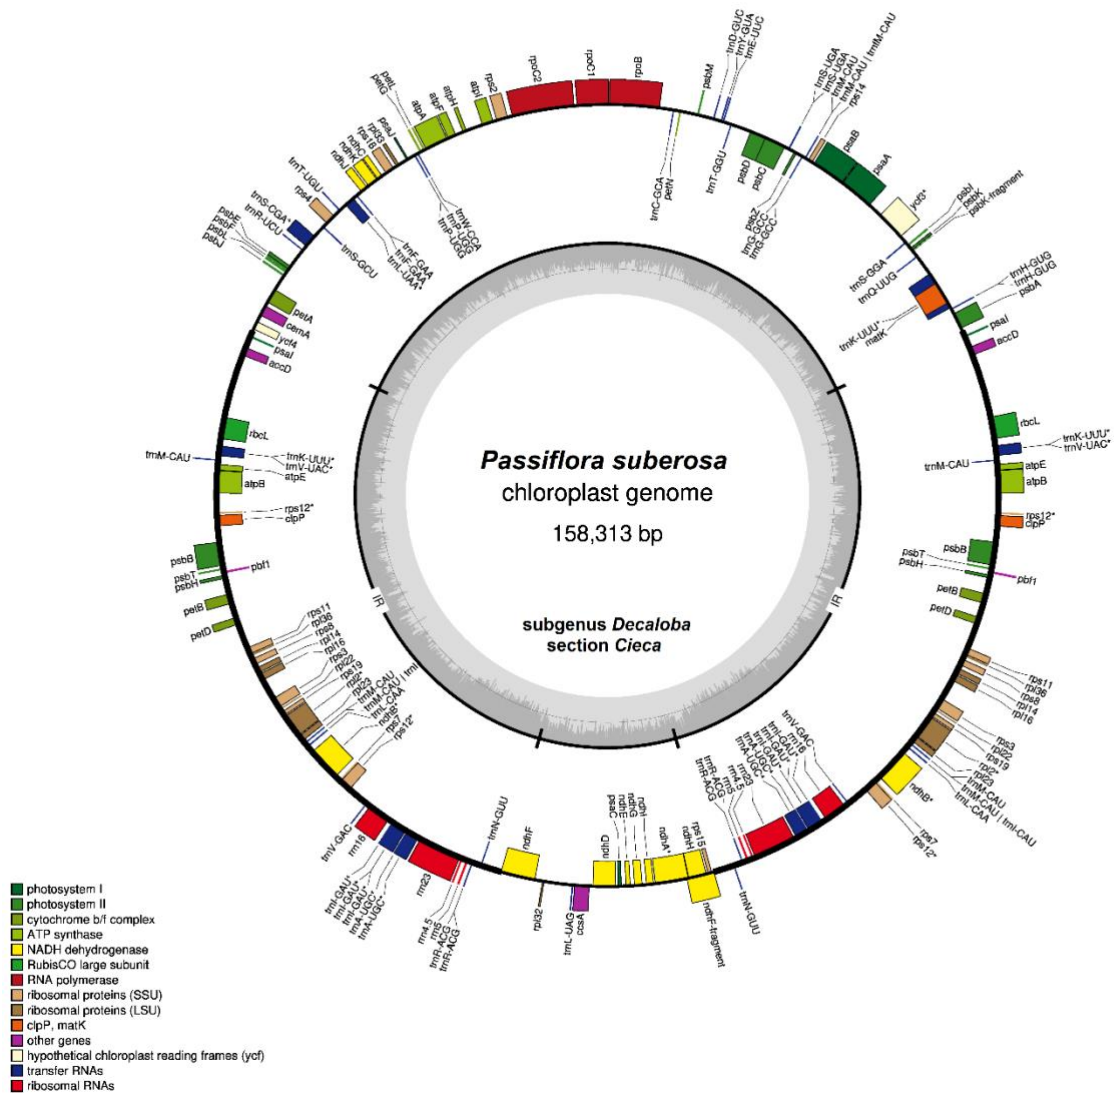

**G.** Chloroplast genome map of *Passiflora suberosa*, subgenus *Decaloba*. Genes are represented as boxes inside or outside the large circle to indicate clockwise (inside) or counter clockwise (outside) transcription. The color of the gene boxes indicates the functional group to which the gene belongs. The thickened lines of the large circle indicate IR regions. The inner most circle denotes the GC content across the genome. LSC, large single-copy region; SSC, small single-copy region.

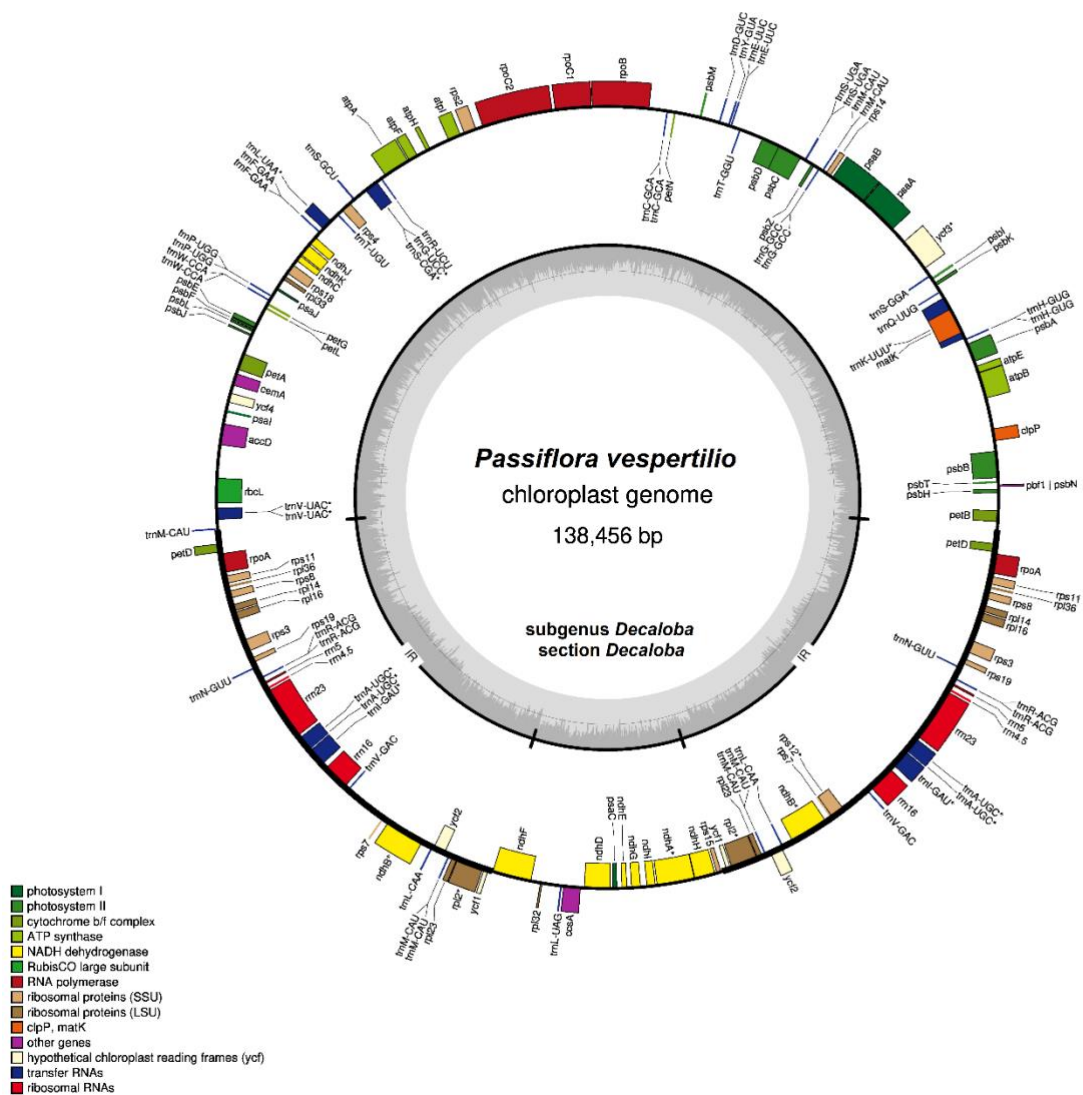

**H.** Chloroplast genome map of *Passiflora vespertilio*, subgenus *Decaloba*. Genes are represented as boxes inside or outside the large circle to indicate clockwise (inside) or counter clockwise (outside) transcription. The color of the gene boxes indicates the functional group to which the gene belongs. The thickened lines of the large circle indicate IR regions. The inner most circle denotes the GC content across the genome. LSC, large single-copy region; SSC, small single-copy region.

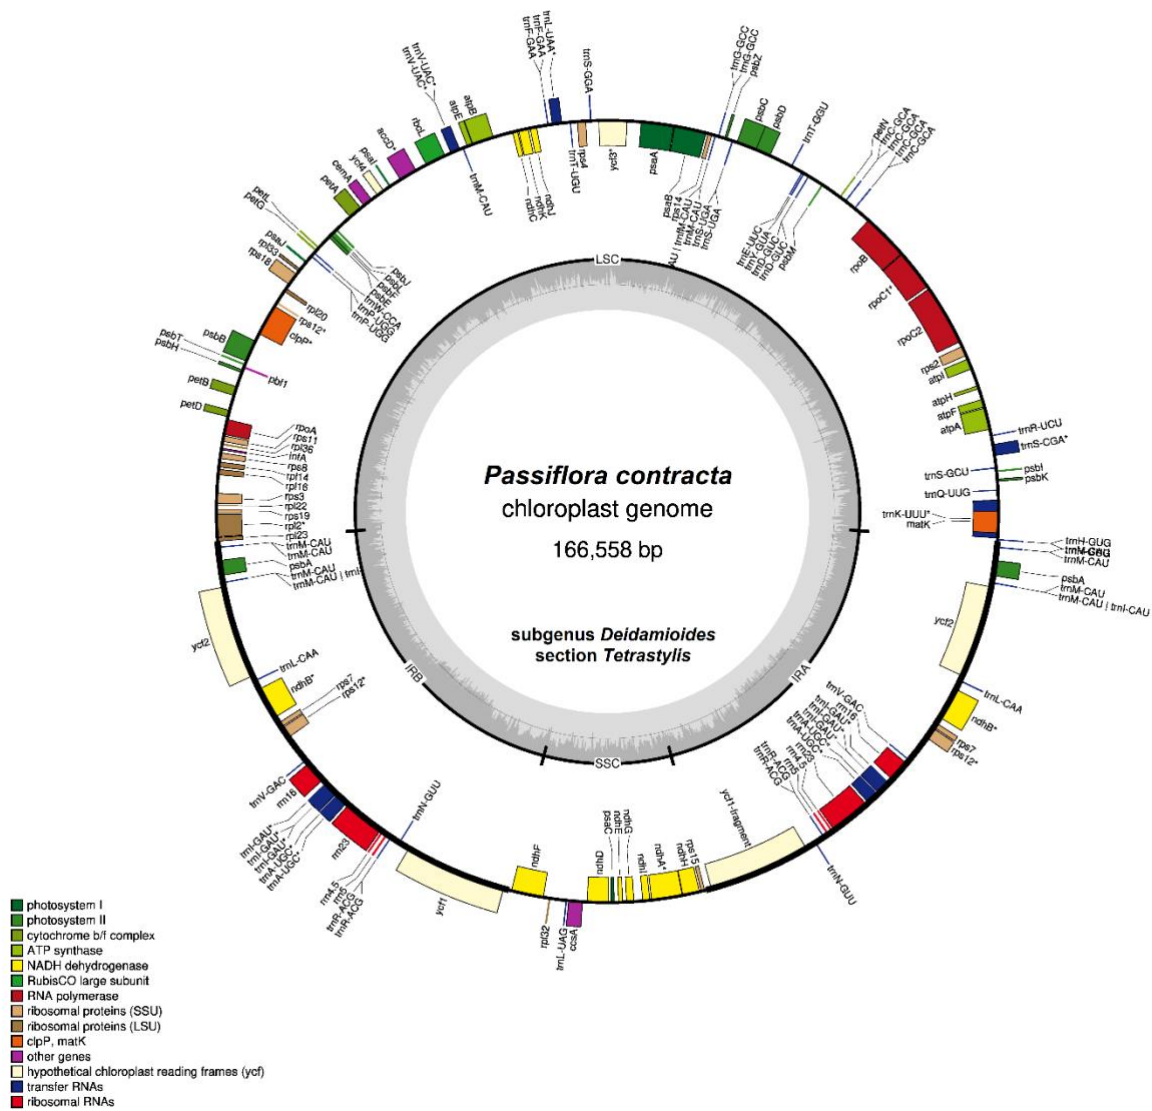

**I.** Chloroplast genome map of *Passiflora contracta*, subgenus *Deidamioides*. Genes are represented as boxes inside or outside the large circle to indicate clockwise (inside) or counter clockwise (outside) transcription. The color of the gene boxes indicates the functional group to which the gene belongs. The thickened lines of the large circle indicate IR regions. The inner most circle denotes the GC content across the genome. LSC, large single-copy region; SSC, small single-copy region.

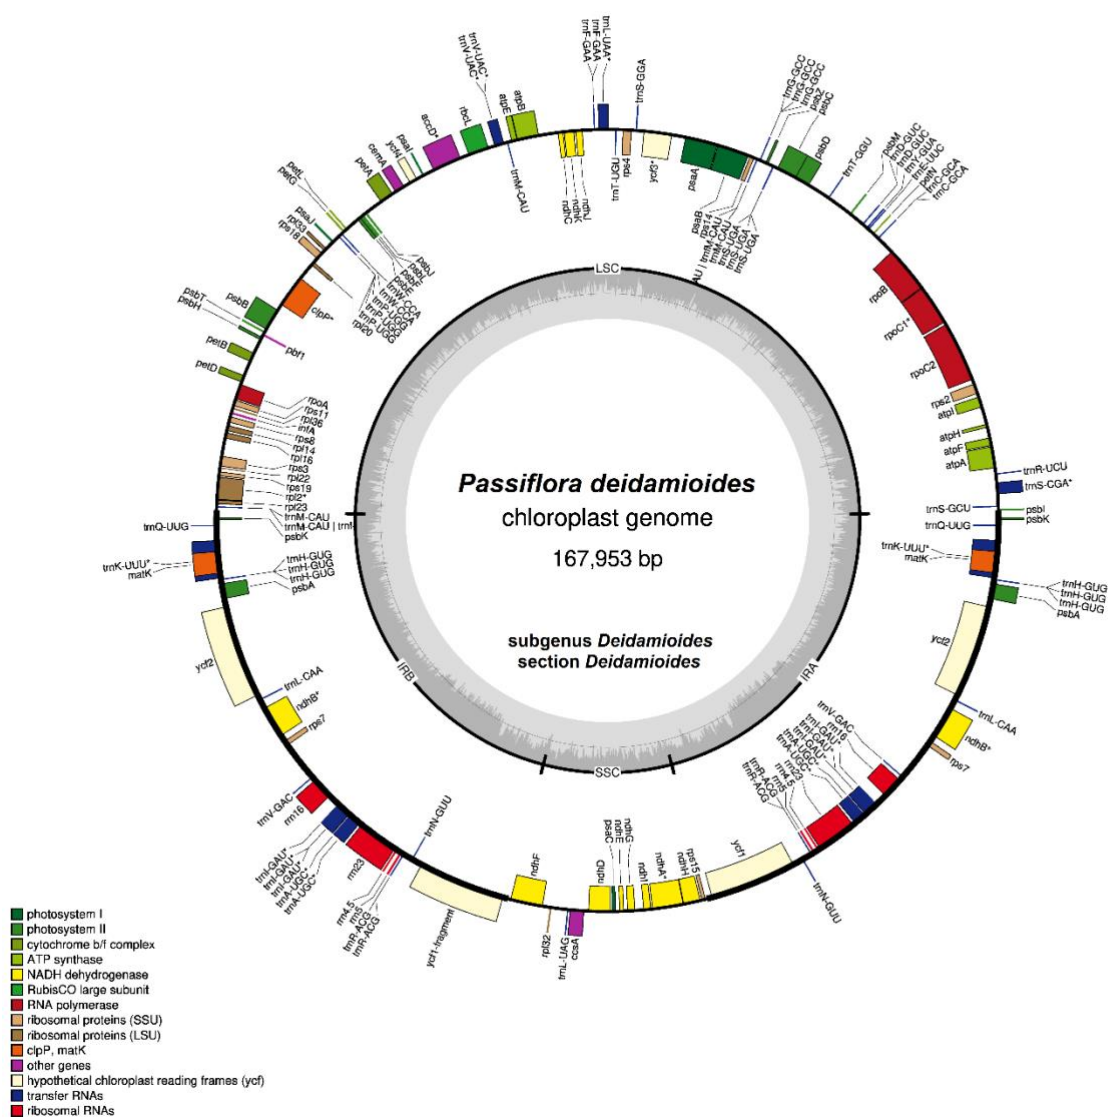

**J.** Chloroplast genome map of *Passiflora deidamioides*, subgenus *Deidamioides*. Genes are represented as boxes inside or outside the large circle to indicate clockwise (inside) or counter clockwise (outside) transcription. The color of the gene boxes indicates the functional group to which the gene belongs. The thickened lines of the large circle indicate IR regions. The inner most circle denotes the GC content across the genome. LSC, large single-copy region; SSC, small single-copy region.

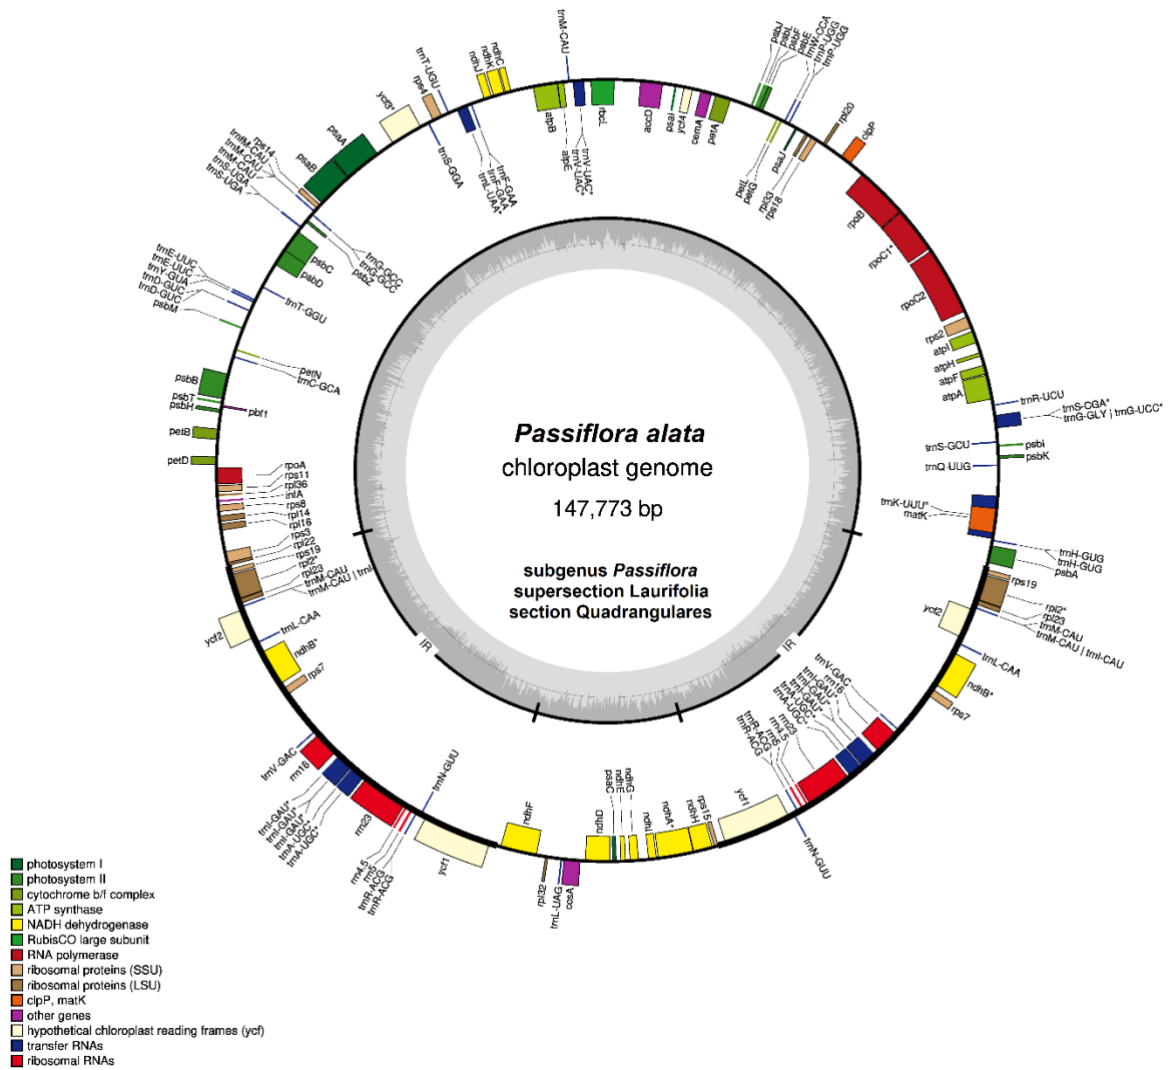

**K.** Chloroplast genome map of *Passiflora alata*, subgenus *Passiflora*. Genes are represented as boxes inside or outside the large circle to indicate clockwise (inside) or counter clockwise (outside) transcription. The color of the gene boxes indicates the functional group to which the gene belongs. The thickened lines of the large circle indicate IR regions. The inner most circle denotes the GC content across the genome. LSC, large single-copy region; SSC, small single-copy region.



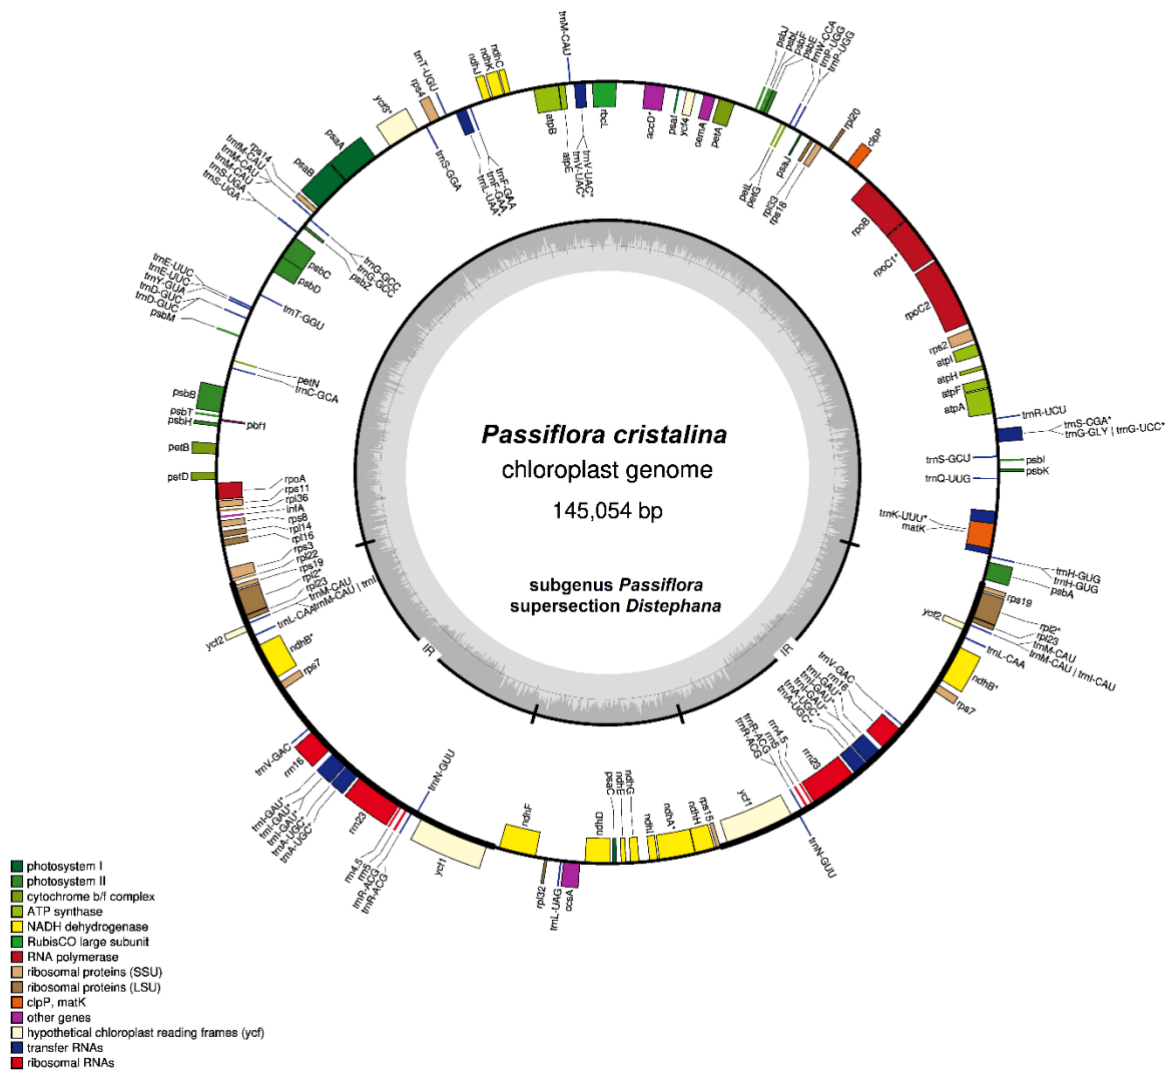

**L.** Chloroplast genome map of *Passiflora cristalina*, subgenus *Passiflora*. Genes are represented as boxes inside or outside the large circle to indicate clockwise (inside) or counter clockwise (outside) transcription. The color of the gene boxes indicates the functional group to which the gene belongs. The thickened lines of the large circle indicate IR regions. The inner most circle denotes the GC content across the genome. LSC, large single-copy region; SSC, small single-copy region.

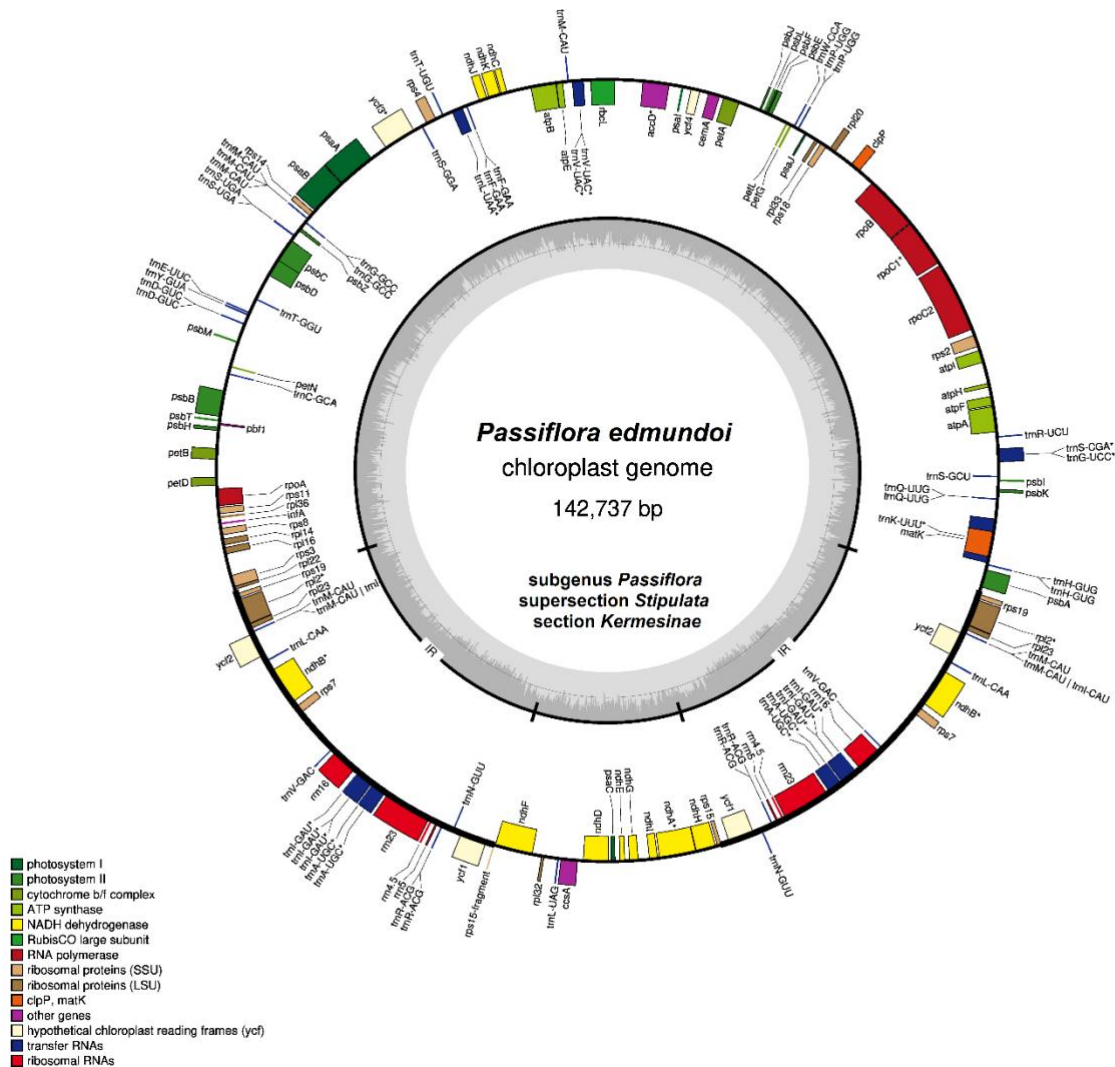

**M.** Chloroplast genome map of *Passiflora edmundoi*, subgenus *Passiflora*. Genes are represented as boxes inside or outside the large circle to indicate clockwise (inside) or counter clockwise (outside) transcription. The color of the gene boxes indicates the functional group to which the gene belongs. The thickened lines of the large circle indicate IR regions. The inner most circle denotes the GC content across the genome. LSC, large single-copy region; SSC, small single-copy region.

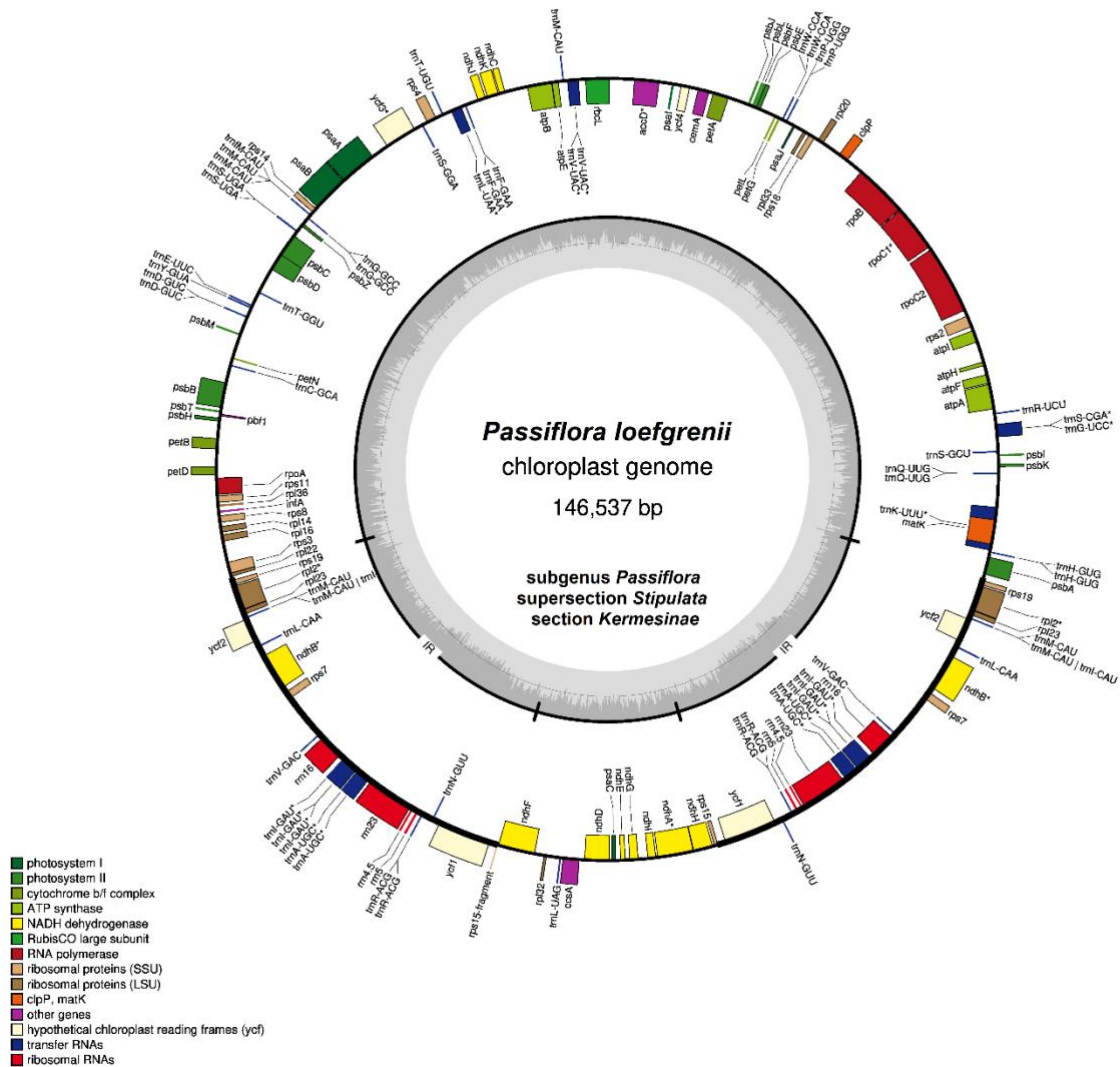

N. Chloroplast genome map of *Passiflora loefgrenii*, subgenus *Passiflora*. Genes are represented as boxes inside or outside the large circle to indicate clockwise (inside) or counter clockwise (outside) transcription. The color of the gene boxes indicates the functional group to which the gene belongs. The thickened lines of the large circle indicate IR regions. The inner most circle denotes the GC content across the genome. LSC, large single-copy region; SSC, small single-copy region.

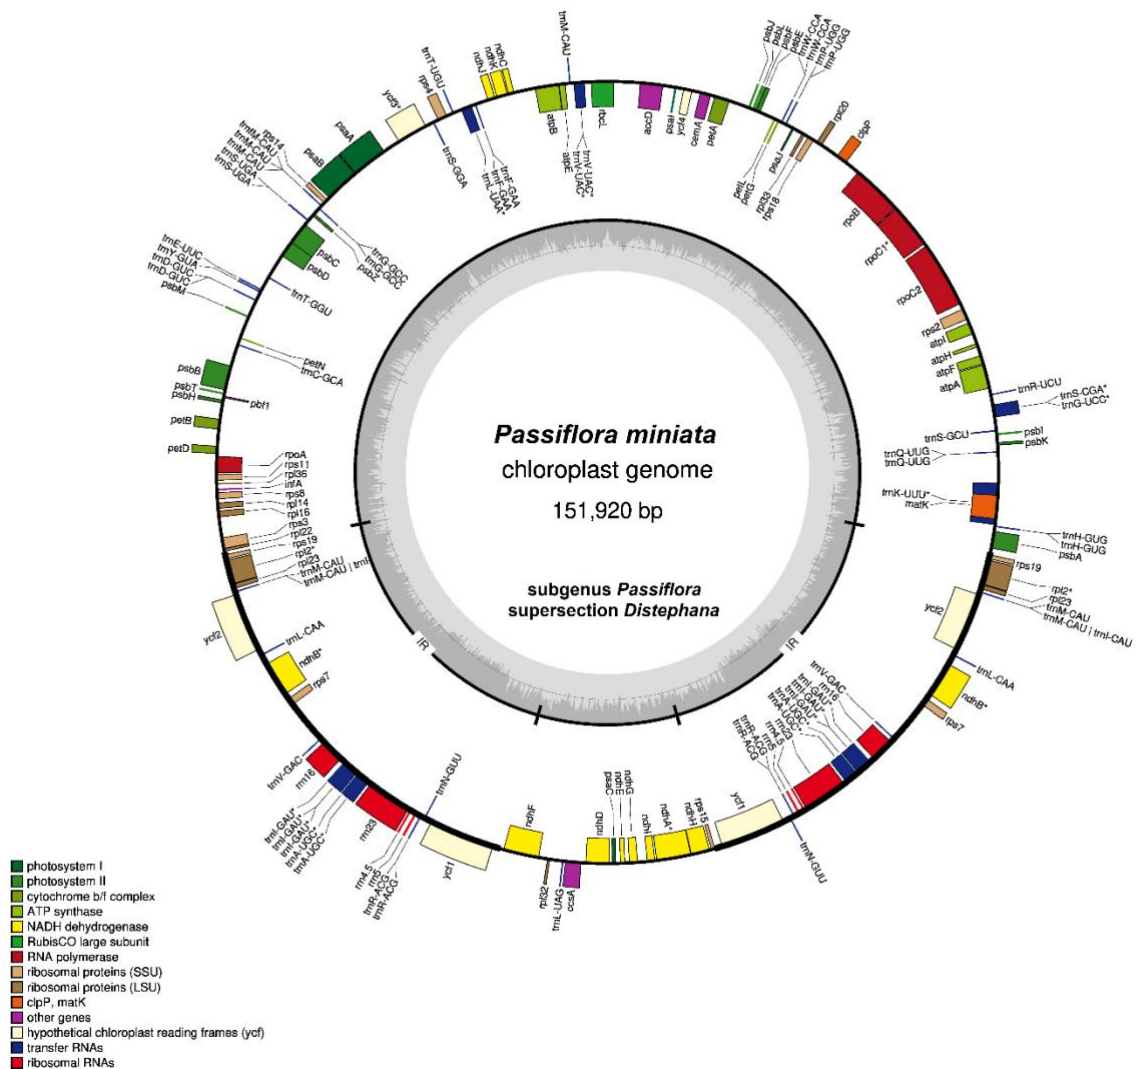

**O.** Chloroplast genome map of *Passiflora miniata*, subgenus *Passiflora*. Genes are represented as boxes inside or outside the large circle to indicate clockwise (inside) or counter clockwise (outside) transcription. The color of the gene boxes indicates the functional group to which the gene belongs. The thickened lines of the large circle indicate IR regions. The inner most circle denotes the GC content across the genome. LSC, large single-copy region; SSC, small single-copy region.

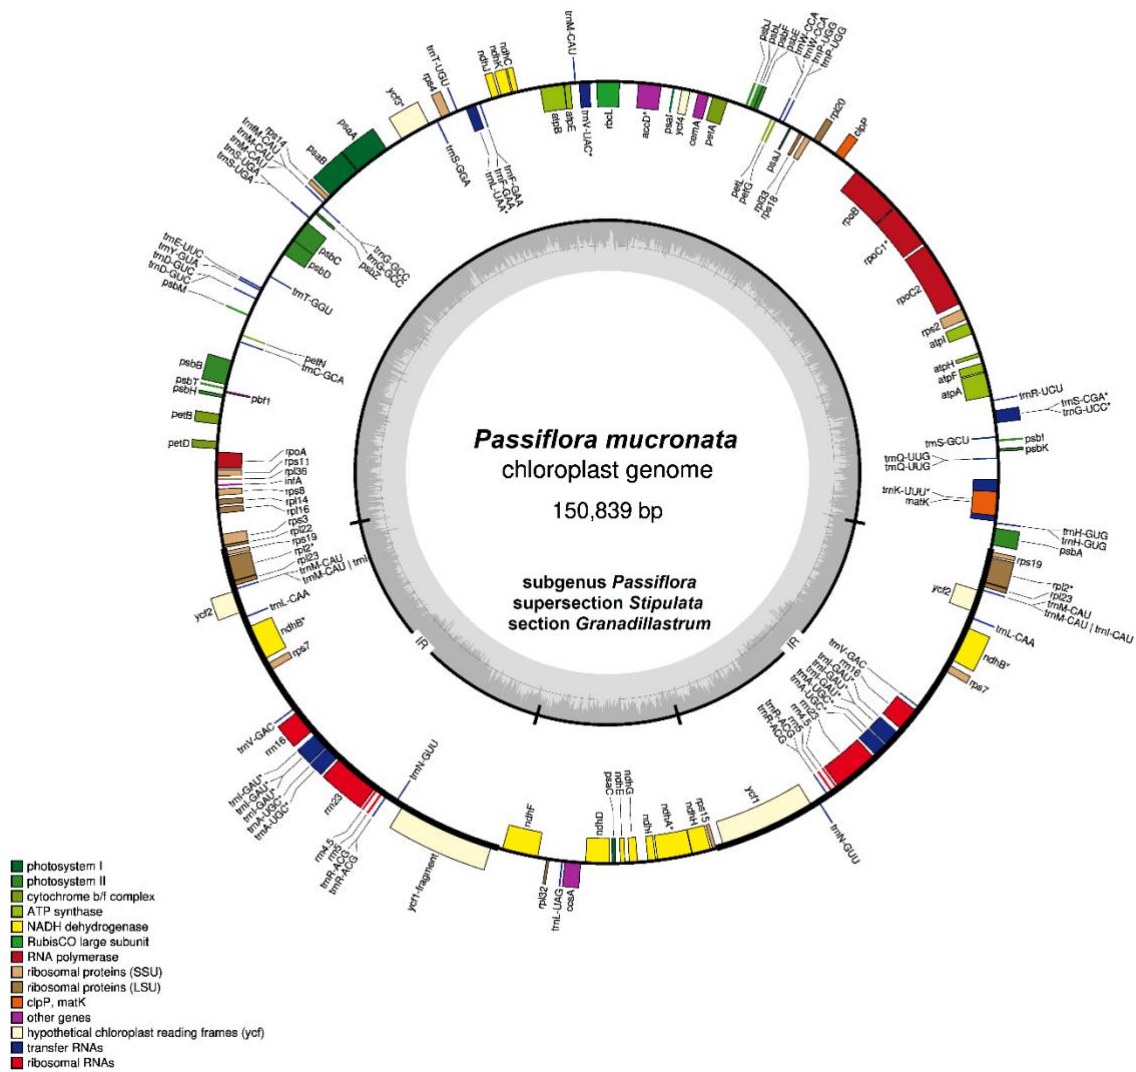

**P.** Chloroplast genome map of *Passiflora mucronata*, subgenus *Passiflora*. Genes are represented as boxes inside or outside the large circle to indicate clockwise (inside) or counter clockwise (outside) transcription. The color of the gene boxes indicates the functional group to which the gene belongs. The thickened lines of the large circle indicate IR regions. The inner most circle denotes the GC content across the genome. LSC, large single-copy region; SSC, small single-copy region.

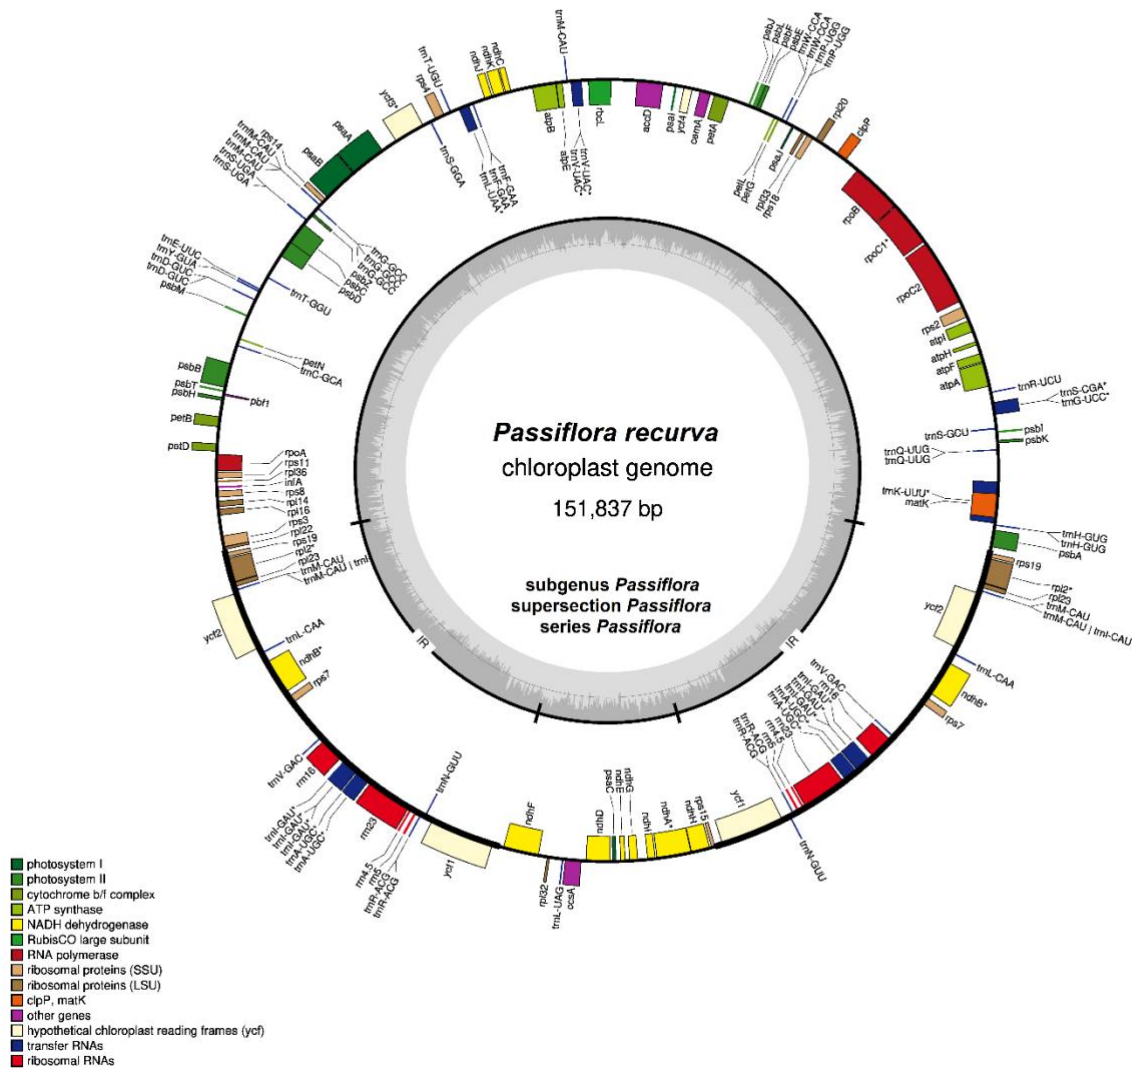

**Q.** Chloroplast genome map of *Passiflora recurva*, subgenus *Passiflora*. Genes are represented as boxes inside or outside the large circle to indicate clockwise (inside) or counter clockwise (outside) transcription. The color of the gene boxes indicates the functional group to which the gene belongs. The thickened lines of the large circle indicate IR regions. The inner most circle denotes the GC content across the genome. LSC, large single-copy region; SSC, small single-copy region.

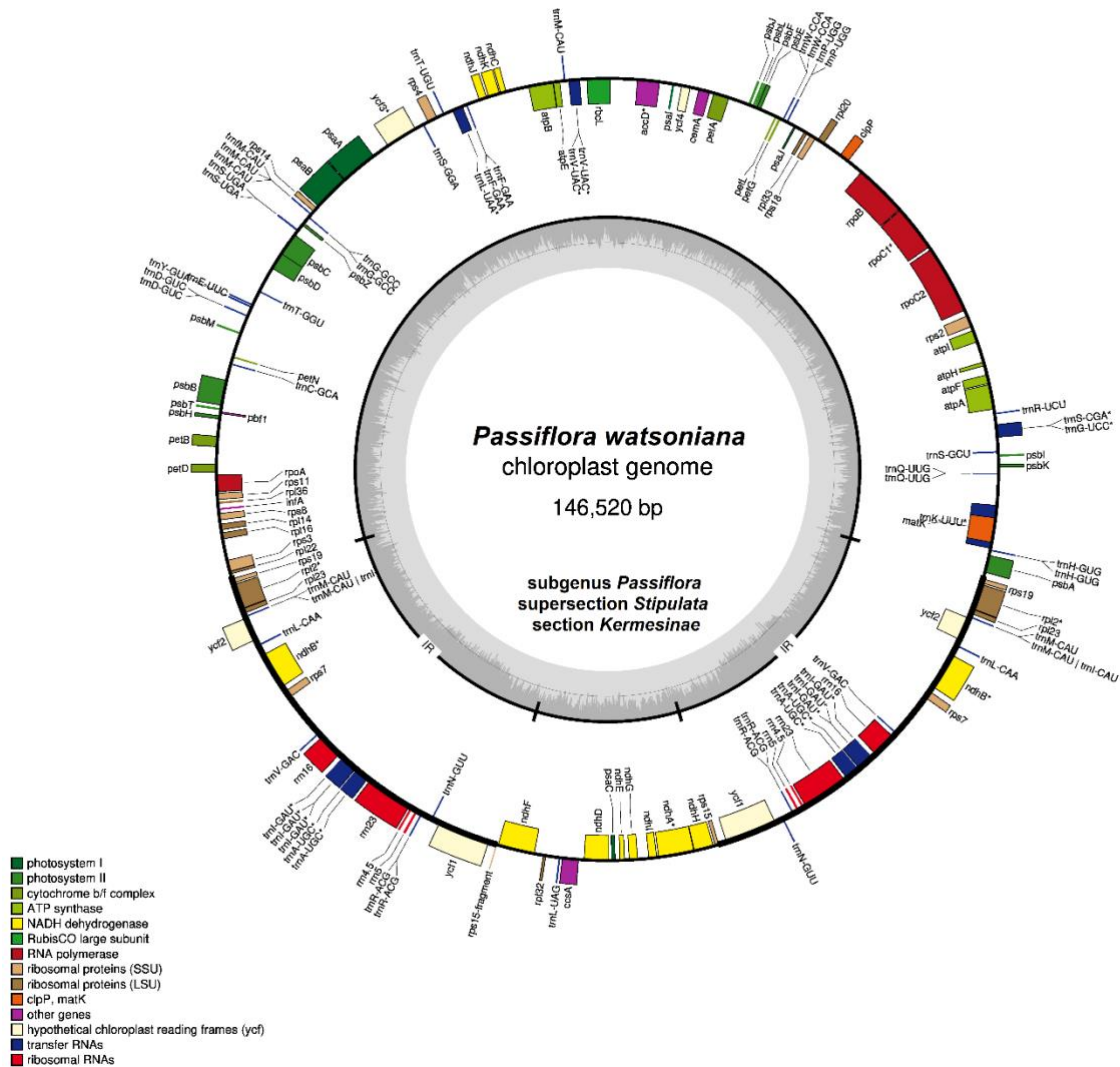

**R.** Chloroplast genome map of *Passiflora watsoniana*, subgenus *Passiflora*. Genes are represented as boxes inside or outside the large circle to indicate clockwise (inside) or counter clockwise (outside) transcription. The color of the gene boxes indicates the functional group to which the gene belongs. The thickened lines of the large circle indicate IR regions. The inner most circle denotes the GC content across the genome. LSC, large single-copy region; SSC, small single-copy region.

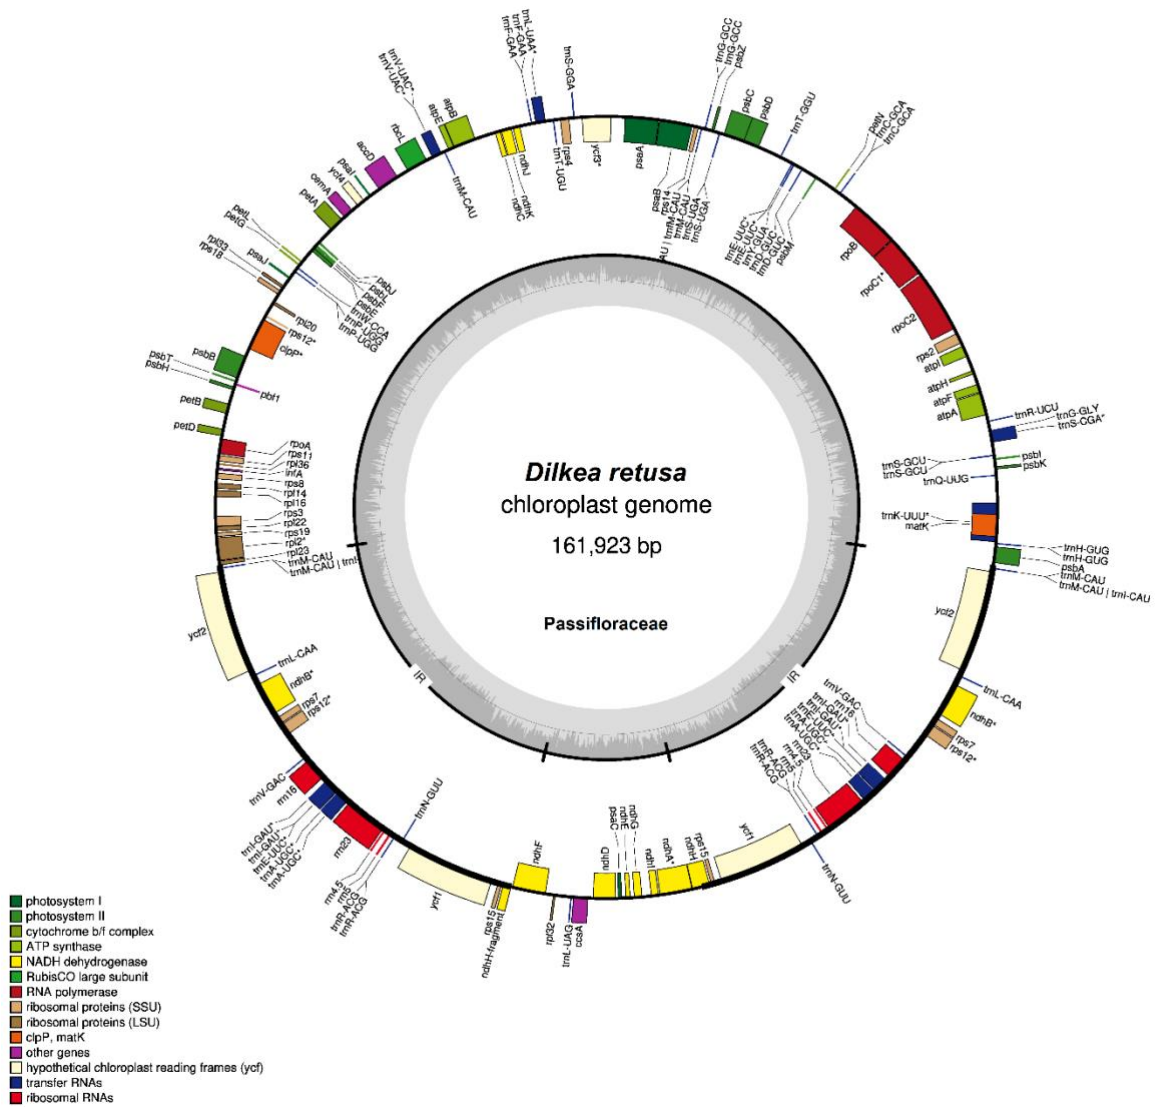

**S.** Chloroplast genome map of *Dilkea retusa*, Passifloraceae. Genes are represented as boxes inside or outside the large circle to indicate clockwise (inside) or counter clockwise (outside) transcription. The color of the gene boxes indicates the functional group to which the gene belongs. The thickened lines of the large circle indicate IR regions. The inner most circle denotes the GC content across the genome. LSC, large single-copy region; SSC, small single-copy region.



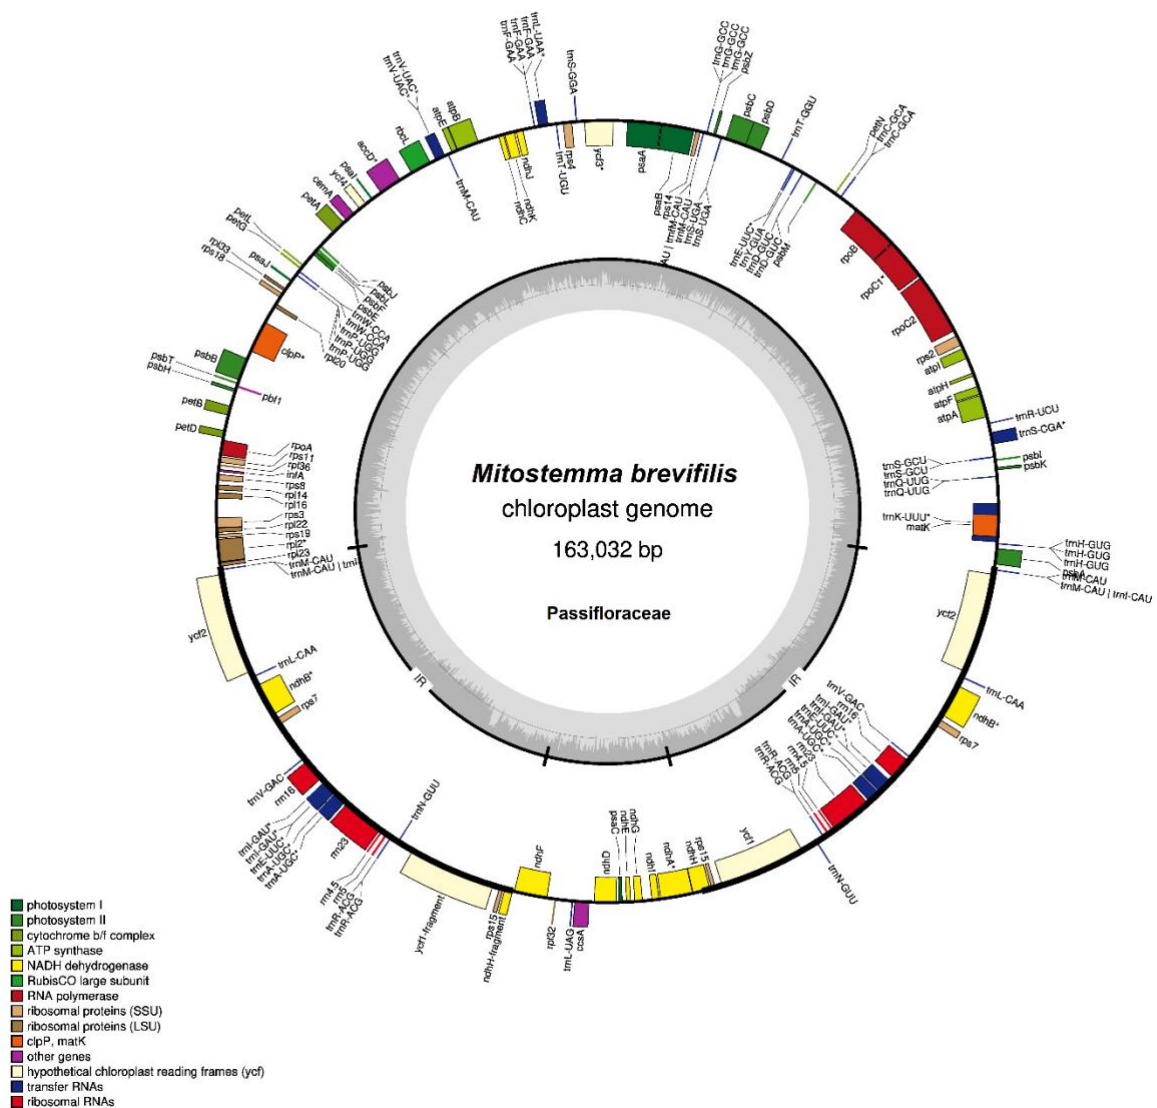

**T.** Chloroplast genome map of *Mitostemma brevifilis*, Passifloraceae. Genes are represented as boxes inside or outside the large circle to indicate clockwise (inside) or counter clockwise (outside) transcription. The color of the gene boxes indicates the functional group to which the gene belongs. The thickened lines of the large circle indicate IR regions. The inner most circle denotes the GC content across the genome. LSC, large single-copy region; SSC, small single-copy region.

**Supplementary Figure S2** Comparative analysis of chloroplast genomes from 18 *Passiflora* species in addition to the Passifloraceae, *Dilkea retusa* and *Mitostemma brevifilis*. *Populus trichocarpa* (Salicaceae) was used as a reference.

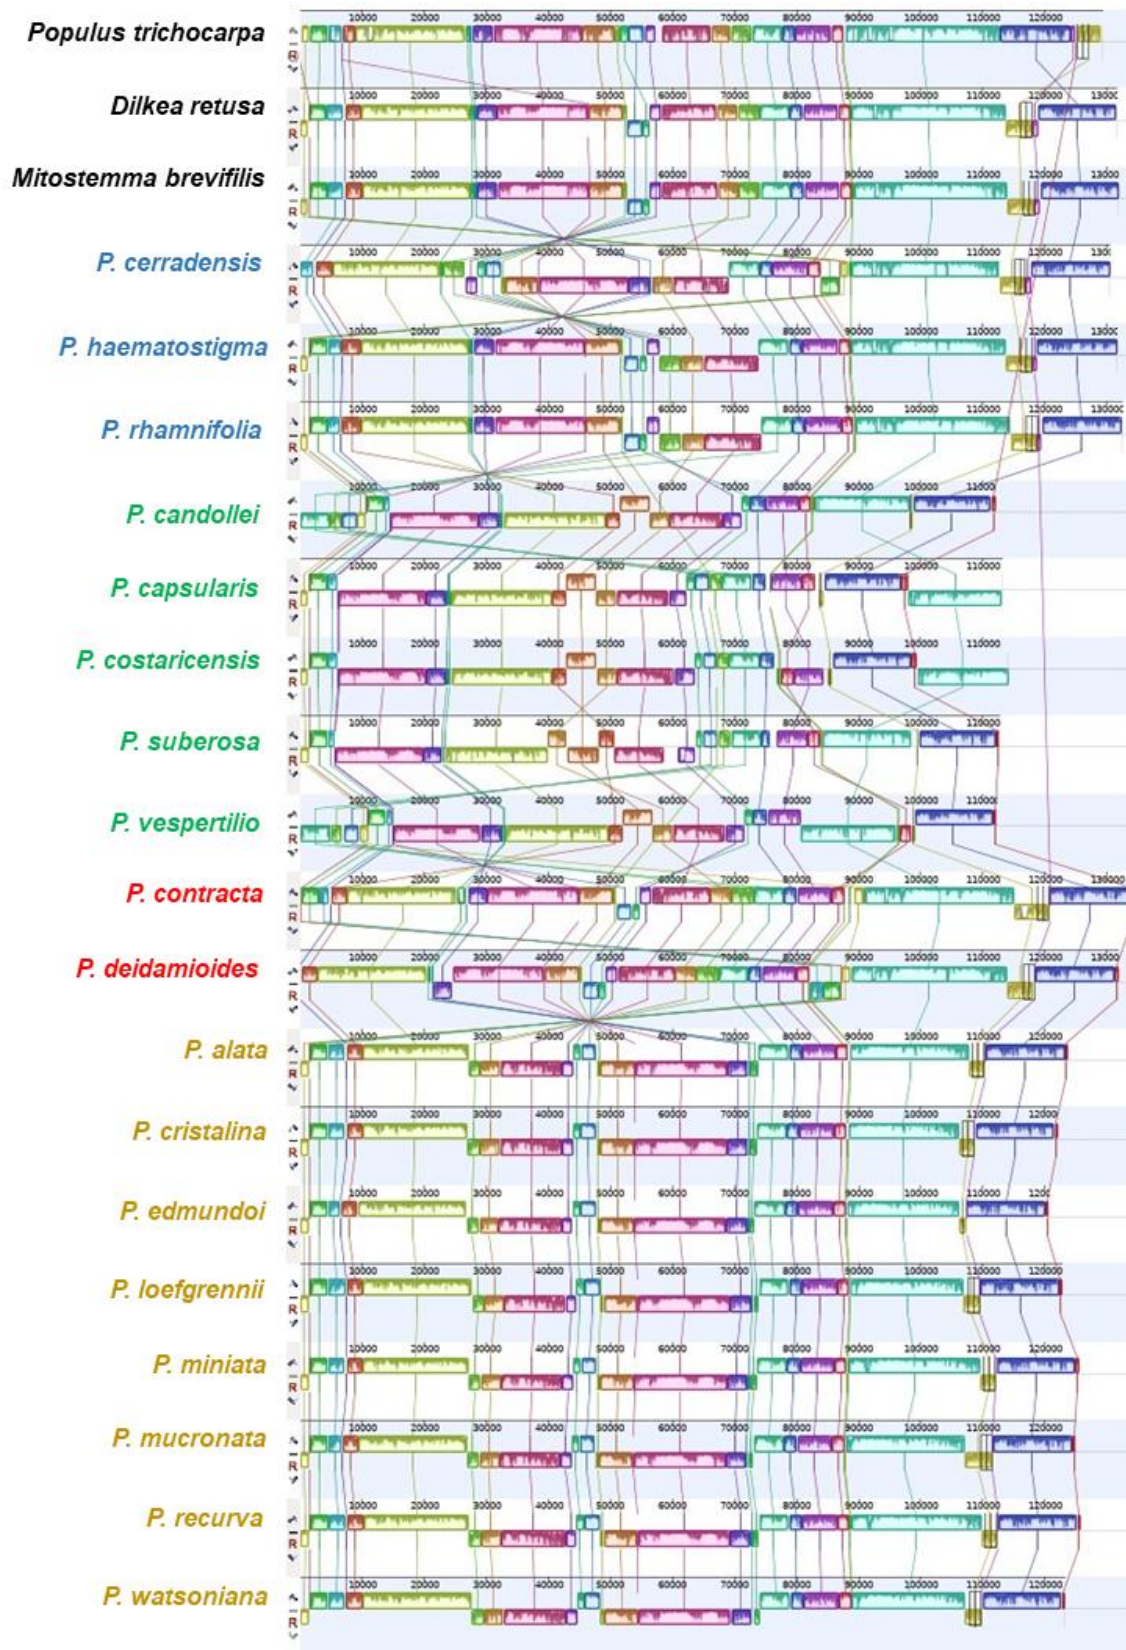

**Supplementary Table S6** Location of the repeats identified in the *Passiflora* chloroplast genomes as well as in *Dilkea retusa* and *Mitostemma brevifilis*. LSC:IG= Intergenic region in LSC; IR:IG= Intergenic region in IRs; SSC:IG= Intergenic region in SCC.

*Passiflora cerradensis*

| Repeat Length 1 | Start Repeat 1 | Orientation | Repeat Length 2 | Start Repeat 2 | Location in cp genome |
|-----------------|----------------|-------------|-----------------|----------------|-----------------------|
| 30              | 1073           | C           | 30              | 127074         | LSC:IG                |
| 30              | 1087           | C           | 30              | 127067         | LSC:IG                |
| 30              | 1096           | P           | 30              | 1096           | LSC:IG                |
| 30              | 1263           | P           | 30              | 1263           | LSC:IG                |
| 30              | 2455           | F           | 30              | 38397          | LSC:IG                |
| 37              | 3017           | P           | 37              | 3017           | LSC:IG                |
| 31              | 4103           | P           | 31              | 46935          | <i>trnG</i> gene      |
| 30              | 4855           | F           | 30              | 7481           | LSC:IG                |
| 31              | 13760          | R           | 31              | 13760          | LSC:IG                |
| 31              | 22115          | R           | 31              | 22115          | LSC:IG                |
| 46              | 29842          | P           | 46              | 29842          | LSC:IG                |
| 30              | 35396          | F           | 30              | 35421          | LSC:IG                |
| 123             | 37215          | F           | 123             | 37243          | LSC:IG                |
| 95              | 37215          | F           | 95              | 37271          | LSC:IG                |
| 67              | 37215          | F           | 67              | 37299          | LSC:IG                |
| 39              | 37215          | F           | 39              | 37327          | LSC:IG                |
| 33              | 38665          | P           | 33              | 38665          | LSC:IG                |
| 42              | 39725          | P           | 42              | 128392         | <i>ycf3</i> gene      |
| 39              | 39725          | P           | 39              | 100610         | <i>ycf3</i> gene      |
| 39              | 39725          | F           | 39              | 148010         | <i>ycf3</i> gene      |
| 33              | 39741          | P           | 33              | 128385         | <i>ycf3</i> gene      |
| 81              | 42477          | F           | 81              | 44701          | <i>psaA</i> gene      |
| 67              | 42491          | F           | 67              | 44715          | <i>psaA</i> gene      |
| 39              | 42519          | F           | 39              | 44743          | <i>psaA</i> gene      |
| 77              | 57118          | F           | 77              | 57136          | <i>rps18</i> gene     |
| 59              | 57118          | F           | 59              | 57154          | <i>rps18</i> gene     |
| 41              | 57118          | F           | 41              | 57172          | <i>rps18</i> gene     |
| 66              | 57493          | F           | 66              | 57511          | <i>rps18</i> gene     |
| 48              | 57493          | F           | 48              | 57529          | <i>rps18</i> gene     |
| 30              | 57493          | F           | 30              | 57547          | <i>rps18</i> gene     |
| 31              | 64894          | P           | 31              | 64894          | LSC:IG                |
| 50              | 65616          | F           | 50              | 65885          | LSC:IG                |
| 193             | 65650          | F           | 193             | 65931          | LSC:IG                |
| 35              | 65693          | F           | 35              | 65785          | LSC:IG                |
| 35              | 65693          | F           | 35              | 66066          | LSC:IG                |

|       |       |   |       |        |                   |
|-------|-------|---|-------|--------|-------------------|
| 31    | 65712 | F | 31    | 66094  | LSC:IG            |
| 30    | 65712 | F | 30    | 65813  | LSC:IG            |
| 35    | 65785 | F | 35    | 65974  | LSC:IG            |
| 30    | 65813 | F | 30    | 65993  | LSC:IG            |
| 35    | 65974 | F | 35    | 66066  | LSC:IG            |
| 31    | 65993 | F | 31    | 66094  | LSC:IG            |
| 46    | 66115 | F | 46    | 82114  | LSC:IG            |
| 35    | 66174 | F | 35    | 66213  | LSC:IG            |
| 84    | 67846 | F | 84    | 67870  | <i>accD</i> gene  |
| 60    | 67846 | F | 60    | 67894  | <i>accD</i> gene  |
| 36    | 67846 | F | 36    | 67918  | <i>accD</i> gene  |
| 117   | 68253 | F | 117   | 68289  | <i>accD</i> gene  |
| 81    | 68253 | F | 81    | 68325  | <i>accD</i> gene  |
| 45    | 68253 | F | 45    | 68361  | <i>accD</i> gene  |
| 46    | 68822 | F | 46    | 68929  | LCS:IG:ACCD       |
| 46    | 68822 | F | 46    | 69092  | LCS:IG:ACCD       |
| 30    | 68853 | F | 30    | 68960  | LCS:IG:ACCD       |
| 30    | 68853 | F | 30    | 69123  | LCS:IG:ACCD       |
| 160   | 68858 | F | 160   | 69021  | LCS:IG:ACCD       |
| 45    | 68858 | F | 45    | 69156  | LCS:IG:ACCD       |
| 30    | 68873 | F | 30    | 69171  | LCS:IG:ACCD       |
| 53    | 68965 | F | 53    | 68993  | LCS:IG:ACCD       |
| 73    | 68993 | F | 73    | 69128  | LCS:IG:ACCD       |
| 30    | 69036 | F | 30    | 69171  | LCS:IG:ACCD       |
| 34    | 71706 | P | 34    | 71716  | LSC:IG            |
| 38    | 83892 | P | 38    | 88598  | <i>rpl23</i> gene |
| 38    | 83892 | F | 38    | 160023 | <i>rpl23</i> gene |
| 45    | 83926 | F | 45    | 88676  | <i>rpl23</i> gene |
| 45    | 83926 | P | 45    | 159938 | <i>rpl23</i> gene |
| 60    | 84085 | F | 60    | 88720  | LSC:IG            |
| 60    | 84085 | P | 60    | 159879 | LSC:IG            |
| 33759 | 84144 | P | 33759 | 130756 | IR                |
| 30    | 87031 | R | 30    | 87031  | IR:IG             |
| 30    | 87031 | C | 30    | 161598 | IR:IG             |
| 59    | 89027 | F | 59    | 89067  | IR:IG             |
| 59    | 89027 | P | 59    | 159533 | IR:IG             |
| 59    | 89067 | P | 59    | 159573 | IR:IG             |
| 32    | 93761 | F | 32    | 93767  | <i>ycf2</i> gene  |
| 32    | 93761 | P | 32    | 154860 | <i>ycf2</i> gene  |
| 39    | 93765 | F | 39    | 93777  | <i>ycf2</i> gene  |
| 39    | 93765 | P | 39    | 154843 | <i>ycf2</i> gene  |
| 32    | 93767 | P | 32    | 154866 | <i>ycf2</i> gene  |
| 39    | 93777 | P | 39    | 154855 | <i>ycf2</i> gene  |
| 49    | 96891 | P | 49    | 96891  | IR:IG             |

|    |        |   |    |        |                  |
|----|--------|---|----|--------|------------------|
| 49 | 96891  | F | 49 | 151719 | IR:IG            |
| 40 | 100610 | F | 40 | 128395 | IR:IG            |
| 52 | 102589 | F | 52 | 102615 | IR:IG            |
| 52 | 102589 | P | 52 | 145992 | IR:IG            |
| 37 | 102604 | F | 37 | 102630 | IR:IG            |
| 37 | 102604 | P | 37 | 145992 | IR:IG            |
| 52 | 102615 | P | 52 | 146018 | IR:IG            |
| 37 | 102630 | P | 37 | 146018 | IR:IG            |
| 30 | 104562 | P | 30 | 104562 | IR:IG            |
| 30 | 104562 | F | 30 | 144067 | IR:IG            |
| 36 | 113646 | F | 36 | 113667 | <i>ycf1</i> gene |
| 36 | 113646 | P | 36 | 134956 | <i>ycf1</i> gene |
| 30 | 113658 | F | 30 | 113679 | <i>ycf1</i> gene |
| 30 | 113658 | P | 30 | 134950 | <i>ycf1</i> gene |
| 36 | 113667 | P | 36 | 134977 | <i>ycf1</i> gene |
| 30 | 113679 | P | 30 | 134971 | <i>ycf1</i> gene |
| 41 | 113751 | F | 41 | 113769 | <i>ycf1</i> gene |
| 41 | 113751 | P | 41 | 134849 | <i>ycf1</i> gene |
| 34 | 113751 | R | 34 | 113758 | <i>ycf1</i> gene |
| 34 | 113751 | C | 34 | 134867 | <i>ycf1</i> gene |
| 35 | 113758 | R | 35 | 113768 | <i>ycf1</i> gene |
| 35 | 113758 | C | 35 | 134856 | <i>ycf1</i> gene |
| 35 | 113768 | C | 35 | 134866 | <i>ycf1</i> gene |
| 41 | 113769 | P | 41 | 134867 | <i>ycf1</i> gene |
| 30 | 122724 | R | 30 | 123355 | <i>ccsA</i> gene |
| 30 | 124958 | P | 30 | 124989 | SSC:IG           |
| 40 | 128395 | P | 40 | 148009 | <i>ndhA</i> gene |
| 31 | 128793 | P | 31 | 128793 | <i>ndhA</i> gene |
| 41 | 134849 | F | 41 | 134867 | <i>ycf1</i> gene |
| 35 | 134856 | R | 35 | 134866 | <i>ycf1</i> gene |
| 34 | 134867 | R | 34 | 134874 | <i>ycf1</i> gene |
| 36 | 134956 | F | 36 | 134977 | <i>ycf1</i> gene |
| 30 | 144067 | P | 30 | 144067 | IR:IG            |
| 52 | 145992 | F | 52 | 146018 | IR:IG            |
| 49 | 151719 | P | 49 | 151719 | IR:IG            |
| 39 | 154843 | F | 39 | 154855 | <i>ycf2</i> gene |
| 32 | 154860 | F | 32 | 154866 | <i>ycf2</i> gene |
| 59 | 159533 | F | 59 | 159573 | IR:IG            |
| 30 | 161598 | R | 30 | 161598 | IR:IG            |

---

*Passiflora haematostigma*

---

| Repeat Length 1 | Start Repeat 1 | Orientation | Repeat Length 2 | Start Repeat 2 | Location in cp genome |
|-----------------|----------------|-------------|-----------------|----------------|-----------------------|
| 53              | 9205           | F           | 53              | 9319           | LSC:IG                |

|    |      |   |    |        |        |
|----|------|---|----|--------|--------|
| 43 | 9205 | F | 43 | 9251   | LSC:IG |
| 41 | 9219 | F | 41 | 9265   | LSC:IG |
| 43 | 9219 | F | 43 | 9293   | LSC:IG |
| 43 | 9235 | C | 43 | 9704   | LSC:IG |
| 33 | 9239 | R | 33 | 9239   | LSC:IG |
| 39 | 9239 | C | 39 | 9706   | LSC:IG |
| 39 | 9239 | P | 39 | 9706   | LSC:IG |
| 39 | 9239 | R | 39 | 9707   | LSC:IG |
| 39 | 9239 | F | 39 | 9707   | LSC:IG |
| 39 | 9239 | P | 39 | 9708   | LSC:IG |
| 39 | 9239 | R | 39 | 9709   | LSC:IG |
| 39 | 9239 | F | 39 | 9709   | LSC:IG |
| 38 | 9239 | R | 38 | 9706   | LSC:IG |
| 38 | 9239 | C | 38 | 9710   | LSC:IG |
| 38 | 9240 | F | 38 | 9706   | LSC:IG |
| 38 | 9240 | P | 38 | 9710   | LSC:IG |
| 42 | 9242 | F | 42 | 63261  | LSC:IG |
| 33 | 9243 | F | 33 | 9313   | LSC:IG |
| 53 | 9251 | F | 53 | 9319   | LSC:IG |
| 47 | 9257 | F | 47 | 9285   | LSC:IG |
| 39 | 9265 | F | 39 | 9333   | LSC:IG |
| 39 | 9293 | F | 39 | 9333   | LSC:IG |
| 50 | 9367 | F | 50 | 9412   | LSC:IG |
| 39 | 9386 | F | 39 | 9400   | LSC:IG |
| 34 | 9701 | F | 34 | 129488 | LSC:IG |
| 44 | 9705 | P | 44 | 9705   | LSC:IG |
| 37 | 9705 | P | 37 | 63261  | LSC:IG |
| 41 | 9706 | R | 41 | 9706   | LSC:IG |
| 41 | 9706 | C | 41 | 9707   | LSC:IG |
| 40 | 9706 | P | 40 | 9706   | LSC:IG |
| 40 | 9706 | F | 40 | 9708   | LSC:IG |
| 39 | 9706 | R | 39 | 9706   | LSC:IG |
| 39 | 9706 | C | 39 | 9709   | LSC:IG |
| 38 | 9706 | P | 38 | 9706   | LSC:IG |
| 38 | 9706 | F | 38 | 9710   | LSC:IG |
| 37 | 9706 | R | 37 | 9706   | LSC:IG |
| 37 | 9706 | C | 37 | 9711   | LSC:IG |
| 36 | 9706 | P | 36 | 9706   | LSC:IG |
| 36 | 9706 | F | 36 | 9712   | LSC:IG |
| 36 | 9706 | F | 36 | 63261  | LSC:IG |
| 35 | 9706 | R | 35 | 9706   | LSC:IG |
| 35 | 9706 | C | 35 | 9713   | LSC:IG |
| 35 | 9706 | R | 35 | 63261  | LSC:IG |
| 35 | 9706 | C | 35 | 63262  | LSC:IG |

|    |       |   |    |       |                   |
|----|-------|---|----|-------|-------------------|
| 34 | 9706  | P | 34 | 9706  | LSC:IG            |
| 34 | 9706  | F | 34 | 9714  | LSC:IG            |
| 34 | 9706  | P | 34 | 63261 | LSC:IG            |
| 34 | 9706  | F | 34 | 63263 | LSC:IG            |
| 33 | 9706  | R | 33 | 9706  | LSC:IG            |
| 33 | 9706  | C | 33 | 9715  | LSC:IG            |
| 33 | 9706  | R | 33 | 63261 | LSC:IG            |
| 33 | 9706  | C | 33 | 63264 | LSC:IG            |
| 32 | 9706  | P | 32 | 9706  | LSC:IG            |
| 32 | 9706  | F | 32 | 9716  | LSC:IG            |
| 32 | 9706  | P | 32 | 63261 | LSC:IG            |
| 32 | 9706  | F | 32 | 63265 | LSC:IG            |
| 41 | 9707  | R | 41 | 9707  | LSC:IG            |
| 36 | 9707  | C | 36 | 63261 | LSC:IG            |
| 36 | 9707  | R | 36 | 63261 | LSC:IG            |
| 40 | 9708  | P | 40 | 9708  | LSC:IG            |
| 36 | 9708  | P | 36 | 63261 | LSC:IG            |
| 36 | 9708  | F | 36 | 63261 | LSC:IG            |
| 39 | 9709  | R | 39 | 9709  | LSC:IG            |
| 36 | 9709  | C | 36 | 63261 | LSC:IG            |
| 36 | 9709  | R | 36 | 63261 | LSC:IG            |
| 38 | 9710  | P | 38 | 9710  | LSC:IG            |
| 36 | 9710  | P | 36 | 63261 | LSC:IG            |
| 36 | 9710  | F | 36 | 63261 | LSC:IG            |
| 37 | 9711  | R | 37 | 9711  | LSC:IG            |
| 36 | 9711  | C | 36 | 63261 | LSC:IG            |
| 36 | 9711  | R | 36 | 63261 | LSC:IG            |
| 37 | 9712  | F | 37 | 63261 | LSC:IG            |
| 36 | 9712  | P | 36 | 9712  | LSC:IG            |
| 36 | 9712  | P | 36 | 63261 | LSC:IG            |
| 35 | 9713  | R | 35 | 9713  | LSC:IG            |
| 35 | 9713  | C | 35 | 63261 | LSC:IG            |
| 35 | 9713  | R | 35 | 63262 | LSC:IG            |
| 34 | 9714  | P | 34 | 9714  | LSC:IG            |
| 34 | 9714  | F | 34 | 63261 | LSC:IG            |
| 34 | 9714  | P | 34 | 63263 | LSC:IG            |
| 33 | 9715  | R | 33 | 9715  | LSC:IG            |
| 33 | 9715  | C | 33 | 63261 | LSC:IG            |
| 33 | 9715  | R | 33 | 63264 | LSC:IG            |
| 32 | 9716  | P | 32 | 9716  | LSC:IG            |
| 32 | 9716  | F | 32 | 63261 | LSC:IG            |
| 32 | 9716  | P | 32 | 63265 | LSC:IG            |
| 43 | 21457 | F | 43 | 21478 | <i>rpoC1</i> gene |
| 39 | 31442 | F | 39 | 31473 | LSC:IG            |

|    |       |   |    |        |                  |
|----|-------|---|----|--------|------------------|
| 81 | 39552 | F | 81 | 41776  | <i>psaB</i> gene |
| 42 | 44584 | F | 42 | 130827 | <i>ycf3</i> gene |
| 39 | 44587 | F | 39 | 101889 | <i>ycf3</i> gene |
| 39 | 44587 | P | 39 | 151565 | <i>ycf3</i> gene |
| 69 | 48771 | F | 69 | 48830  | LSC:IG           |
| 46 | 54531 | P | 46 | 54531  | LSC:IG           |
| 40 | 59185 | F | 40 | 59196  | <i>clpP</i> gene |
| 43 | 59185 | R | 43 | 59185  | <i>clpP</i> gene |
| 32 | 59185 | R | 32 | 59185  | <i>clpP</i> gene |
| 50 | 61785 | F | 50 | 61815  | LSC:IG           |
| 49 | 61785 | F | 49 | 61905  | LSC:IG           |
| 41 | 61785 | F | 41 | 61845  | LSC:IG           |
| 43 | 61797 | F | 43 | 61842  | LSC:IG           |
| 50 | 61800 | F | 50 | 61890  | LSC:IG           |
| 44 | 61806 | F | 44 | 61836  | LSC:IG           |
| 46 | 61809 | F | 46 | 61899  | LSC:IG           |
| 43 | 61827 | F | 43 | 61842  | LSC:IG           |
| 47 | 61839 | F | 47 | 61899  | LSC:IG           |
| 41 | 61839 | F | 41 | 62349  | LSC:IG           |
| 50 | 61890 | F | 50 | 62370  | LSC:IG           |
| 49 | 61890 | F | 49 | 62205  | LSC:IG           |
| 45 | 61895 | F | 45 | 62120  | LSC:IG           |
| 45 | 61895 | F | 45 | 62180  | LSC:IG           |
| 44 | 61895 | F | 44 | 62045  | LSC:IG           |
| 44 | 61895 | F | 44 | 62150  | LSC:IG           |
| 65 | 61904 | F | 65 | 61979  | LSC:IG           |
| 49 | 61911 | F | 49 | 61941  | LSC:IG           |
| 44 | 61914 | F | 44 | 62139  | LSC:IG           |
| 53 | 61917 | F | 53 | 62367  | LSC:IG           |
| 45 | 61925 | F | 45 | 61955  | LSC:IG           |
| 44 | 61925 | F | 44 | 62150  | LSC:IG           |
| 37 | 61932 | F | 37 | 62007  | LSC:IG           |
| 43 | 61962 | F | 43 | 62007  | LSC:IG           |
| 43 | 62007 | F | 43 | 62157  | LSC:IG           |
| 76 | 62019 | F | 76 | 62064  | LSC:IG           |
| 61 | 62019 | F | 61 | 62394  | LSC:IG           |
| 46 | 62019 | F | 46 | 62334  | LSC:IG           |
| 46 | 62019 | F | 46 | 62109  | LSC:IG           |
| 46 | 62019 | F | 46 | 62169  | LSC:IG           |
| 44 | 62024 | F | 44 | 62354  | LSC:IG           |
| 41 | 62024 | F | 41 | 62039  | LSC:IG           |
| 41 | 62024 | F | 41 | 62054  | LSC:IG           |
| 44 | 62030 | F | 44 | 62420  | LSC:IG           |
| 76 | 62034 | F | 76 | 62079  | LSC:IG           |



|     |       |   |     |       |        |
|-----|-------|---|-----|-------|--------|
| 55  | 62034 | F | 55  | 62364 | LSC:IG |
| 55  | 62034 | F | 55  | 62409 | LSC:IG |
| 58  | 62037 | F | 58  | 62202 | LSC:IG |
| 58  | 62037 | F | 58  | 62232 | LSC:IG |
| 58  | 62037 | F | 58  | 62142 | LSC:IG |
| 43  | 62037 | F | 43  | 62067 | LSC:IG |
| 71  | 62039 | F | 71  | 62309 | LSC:IG |
| 71  | 62039 | F | 71  | 62174 | LSC:IG |
| 56  | 62039 | F | 56  | 62114 | LSC:IG |
| 50  | 62039 | F | 50  | 62339 | LSC:IG |
| 41  | 62039 | F | 41  | 62264 | LSC:IG |
| 41  | 62039 | F | 41  | 62399 | LSC:IG |
| 68  | 62045 | F | 68  | 62375 | LSC:IG |
| 44  | 62045 | F | 44  | 62420 | LSC:IG |
| 43  | 62052 | F | 43  | 62067 | LSC:IG |
| 50  | 62054 | F | 50  | 62339 | LSC:IG |
| 41  | 62054 | F | 41  | 62294 | LSC:IG |
| 41  | 62054 | F | 41  | 62399 | LSC:IG |
| 65  | 62060 | F | 65  | 62390 | LSC:IG |
| 50  | 62060 | F | 50  | 62165 | LSC:IG |
| 50  | 62060 | F | 50  | 62225 | LSC:IG |
| 106 | 62067 | F | 106 | 62127 | LSC:IG |
| 76  | 62067 | F | 76  | 62217 | LSC:IG |
| 73  | 62067 | F | 73  | 62352 | LSC:IG |
| 58  | 62067 | F | 58  | 62247 | LSC:IG |
| 46  | 62067 | F | 46  | 62097 | LSC:IG |
| 46  | 62067 | F | 46  | 62187 | LSC:IG |
| 46  | 62067 | F | 46  | 62412 | LSC:IG |
| 43  | 62067 | F | 43  | 62082 | LSC:IG |
| 43  | 62067 | F | 43  | 62322 | LSC:IG |
| 74  | 62069 | F | 74  | 62264 | LSC:IG |
| 71  | 62069 | F | 71  | 62294 | LSC:IG |
| 56  | 62069 | F | 56  | 62399 | LSC:IG |
| 41  | 62069 | F | 41  | 62339 | LSC:IG |
| 41  | 62069 | F | 41  | 62114 | LSC:IG |
| 41  | 62069 | F | 41  | 62174 | LSC:IG |
| 41  | 62069 | F | 41  | 62309 | LSC:IG |
| 44  | 62075 | F | 44  | 62420 | LSC:IG |
| 142 | 62082 | F | 142 | 62142 | LSC:IG |
| 82  | 62082 | F | 82  | 62202 | LSC:IG |
| 73  | 62082 | F | 73  | 62232 | LSC:IG |
| 119 | 62084 | F | 119 | 62174 | LSC:IG |
| 110 | 62084 | F | 110 | 62309 | LSC:IG |
| 80  | 62084 | F | 80  | 62114 | LSC:IG |

|     |       |   |     |       |        |
|-----|-------|---|-----|-------|--------|
| 56  | 62084 | F | 56  | 62264 | LSC:IG |
| 50  | 62090 | F | 50  | 62375 | LSC:IG |
| 44  | 62090 | F | 44  | 62420 | LSC:IG |
| 71  | 62099 | F | 71  | 62294 | LSC:IG |
| 128 | 62105 | F | 128 | 62165 | LSC:IG |
| 80  | 62105 | F | 80  | 62225 | LSC:IG |
| 50  | 62105 | F | 50  | 62390 | LSC:IG |
| 101 | 62114 | F | 101 | 62204 | LSC:IG |
| 71  | 62114 | F | 71  | 62234 | LSC:IG |
| 59  | 62114 | F | 59  | 62144 | LSC:IG |
| 56  | 62114 | F | 56  | 62369 | LSC:IG |
| 51  | 62114 | F | 51  | 62414 | LSC:IG |
| 71  | 62129 | F | 71  | 62294 | LSC:IG |
| 41  | 62129 | F | 41  | 62339 | LSC:IG |
| 80  | 62135 | F | 80  | 62225 | LSC:IG |
| 59  | 62135 | F | 59  | 62165 | LSC:IG |
| 35  | 62135 | F | 35  | 62390 | LSC:IG |
| 58  | 62142 | F | 58  | 62367 | LSC:IG |
| 43  | 62142 | F | 43  | 62412 | LSC:IG |
| 80  | 62144 | F | 80  | 62174 | LSC:IG |
| 65  | 62144 | F | 65  | 62309 | LSC:IG |
| 41  | 62144 | F | 41  | 62264 | LSC:IG |
| 41  | 62144 | F | 41  | 62399 | LSC:IG |
| 65  | 62150 | F | 65  | 62375 | LSC:IG |
| 71  | 62159 | F | 71  | 62294 | LSC:IG |
| 68  | 62165 | F | 68  | 62195 | LSC:IG |
| 68  | 62165 | F | 68  | 62330 | LSC:IG |
| 50  | 62165 | F | 50  | 62255 | LSC:IG |
| 101 | 62174 | F | 101 | 62204 | LSC:IG |
| 71  | 62174 | F | 71  | 62234 | LSC:IG |
| 56  | 62174 | F | 56  | 62369 | LSC:IG |
| 51  | 62174 | F | 51  | 62414 | LSC:IG |
| 71  | 62189 | F | 71  | 62294 | LSC:IG |
| 41  | 62189 | F | 41  | 62339 | LSC:IG |
| 80  | 62195 | F | 80  | 62225 | LSC:IG |
| 50  | 62195 | F | 50  | 62390 | LSC:IG |
| 58  | 62202 | F | 58  | 62367 | LSC:IG |
| 43  | 62202 | F | 43  | 62412 | LSC:IG |
| 43  | 62202 | F | 43  | 62352 | LSC:IG |
| 56  | 62204 | F | 56  | 62309 | LSC:IG |
| 41  | 62204 | F | 41  | 62264 | LSC:IG |
| 41  | 62204 | F | 41  | 62399 | LSC:IG |
| 50  | 62210 | F | 50  | 62375 | LSC:IG |
| 44  | 62210 | F | 44  | 62420 | LSC:IG |

|     |       |   |     |        |                   |
|-----|-------|---|-----|--------|-------------------|
| 71  | 62219 | F | 71  | 62294  | LSC:IG            |
| 50  | 62225 | F | 50  | 62255  | LSC:IG            |
| 35  | 62225 | F | 35  | 62330  | LSC:IG            |
| 73  | 62232 | F | 73  | 62277  | LSC:IG            |
| 58  | 62232 | F | 58  | 62367  | LSC:IG            |
| 43  | 62232 | F | 43  | 62412  | LSC:IG            |
| 56  | 62234 | F | 56  | 62309  | LSC:IG            |
| 56  | 62234 | F | 56  | 62264  | LSC:IG            |
| 50  | 62240 | F | 50  | 62375  | LSC:IG            |
| 44  | 62240 | F | 44  | 62420  | LSC:IG            |
| 80  | 62249 | F | 80  | 62294  | LSC:IG            |
| 35  | 62255 | F | 35  | 62390  | LSC:IG            |
| 50  | 62264 | F | 50  | 62414  | LSC:IG            |
| 41  | 62264 | F | 41  | 62369  | LSC:IG            |
| 41  | 62264 | F | 41  | 62279  | LSC:IG            |
| 56  | 62279 | F | 56  | 62309  | LSC:IG            |
| 41  | 62279 | F | 41  | 62294  | LSC:IG            |
| 41  | 62294 | F | 41  | 62324  | LSC:IG            |
| 41  | 62294 | F | 41  | 62384  | LSC:IG            |
| 41  | 62309 | F | 41  | 62414  | LSC:IG            |
| 65  | 62315 | F | 65  | 62375  | LSC:IG            |
| 50  | 62330 | F | 50  | 62390  | LSC:IG            |
| 41  | 62339 | F | 41  | 62354  | LSC:IG            |
| 56  | 62354 | F | 56  | 62399  | LSC:IG            |
| 44  | 62405 | F | 44  | 62420  | LSC:IG            |
| 53  | 62766 | F | 53  | 62784  | <i>rps18</i> gene |
| 35  | 62766 | F | 35  | 62802  | <i>rps18</i> gene |
| 135 | 63016 | F | 135 | 63064  | LSC:IG            |
| 87  | 63016 | F | 87  | 63112  | LSC:IG            |
| 39  | 63016 | F | 39  | 63160  | LSC:IG            |
| 39  | 63016 | F | 39  | 63200  | LSC:IG            |
| 51  | 63052 | F | 51  | 63188  | LSC:IG            |
| 37  | 63052 | F | 37  | 63228  | LSC:IG            |
| 51  | 63100 | F | 51  | 63188  | LSC:IG            |
| 37  | 63100 | F | 37  | 63228  | LSC:IG            |
| 77  | 63148 | F | 77  | 63188  | LSC:IG            |
| 37  | 63148 | F | 37  | 63228  | LSC:IG            |
| 36  | 63254 | R | 36  | 129493 | LSC:IG            |
| 35  | 63254 | P | 35  | 129493 | LSC:IG            |
| 36  | 63261 | P | 36  | 63261  | LSC:IG            |
| 35  | 63261 | R | 35  | 63261  | LSC:IG            |
| 35  | 63261 | C | 35  | 63262  | LSC:IG            |
| 34  | 63261 | P | 34  | 63261  | LSC:IG            |
| 34  | 63261 | F | 34  | 63263  | LSC:IG            |

|     |       |   |     |       |                  |
|-----|-------|---|-----|-------|------------------|
| 33  | 63261 | R | 33  | 63261 | LSC:IG           |
| 33  | 63261 | C | 33  | 63264 | LSC:IG           |
| 32  | 63261 | P | 32  | 63261 | LSC:IG           |
| 32  | 63261 | F | 32  | 63265 | LSC:IG           |
| 35  | 63262 | R | 35  | 63262 | LSC:IG           |
| 34  | 63263 | P | 34  | 63263 | LSC:IG           |
| 33  | 63264 | R | 33  | 63264 | LSC:IG           |
| 32  | 63265 | P | 32  | 63265 | LSC:IG           |
| 55  | 71280 | F | 55  | 71454 | LSC:IG           |
| 83  | 71296 | F | 83  | 71383 | LSC:IG           |
| 66  | 71313 | F | 66  | 71400 | LSC:IG           |
| 57  | 71313 | F | 57  | 71487 | LSC:IG           |
| 67  | 71383 | F | 67  | 71470 | LSC:IG           |
| 65  | 71392 | F | 65  | 71479 | LSC:IG           |
| 120 | 72937 | F | 120 | 73861 | <i>accD</i> gene |
| 39  | 72979 | F | 39  | 72994 | <i>accD</i> gene |
| 39  | 72979 | F | 39  | 73918 | <i>accD</i> gene |
| 39  | 72994 | F | 39  | 73903 | <i>accD</i> gene |
| 47  | 73111 | F | 47  | 73666 | <i>accD</i> gene |
| 47  | 73111 | F | 47  | 73186 | <i>accD</i> gene |
| 47  | 73111 | F | 47  | 73246 | <i>accD</i> gene |
| 47  | 73111 | F | 47  | 73306 | <i>accD</i> gene |
| 47  | 73111 | F | 47  | 73366 | <i>accD</i> gene |
| 47  | 73111 | F | 47  | 73426 | <i>accD</i> gene |
| 47  | 73111 | F | 47  | 73486 | <i>accD</i> gene |
| 47  | 73111 | F | 47  | 73546 | <i>accD</i> gene |
| 47  | 73111 | F | 47  | 73606 | <i>accD</i> gene |
| 58  | 73123 | F | 58  | 73153 | <i>accD</i> gene |
| 43  | 73138 | F | 43  | 73228 | <i>accD</i> gene |
| 43  | 73138 | F | 43  | 73288 | <i>accD</i> gene |
| 43  | 73138 | F | 43  | 73348 | <i>accD</i> gene |
| 43  | 73138 | F | 43  | 73408 | <i>accD</i> gene |
| 43  | 73138 | F | 43  | 73468 | <i>accD</i> gene |
| 43  | 73138 | F | 43  | 73528 | <i>accD</i> gene |
| 43  | 73138 | F | 43  | 73588 | <i>accD</i> gene |
| 43  | 73138 | F | 43  | 73648 | <i>accD</i> gene |
| 44  | 73144 | F | 44  | 73669 | <i>accD</i> gene |
| 47  | 73149 | F | 47  | 73659 | <i>accD</i> gene |
| 32  | 73149 | F | 32  | 73239 | <i>accD</i> gene |
| 32  | 73149 | F | 32  | 73299 | <i>accD</i> gene |
| 32  | 73149 | F | 32  | 73359 | <i>accD</i> gene |
| 32  | 73149 | F | 32  | 73419 | <i>accD</i> gene |
| 32  | 73149 | F | 32  | 73479 | <i>accD</i> gene |
| 32  | 73149 | F | 32  | 73539 | <i>accD</i> gene |

|       |        |   |       |        |                  |
|-------|--------|---|-------|--------|------------------|
| 32    | 73149  | F | 32    | 73599  | <i>accD</i> gene |
| 35    | 73153  | F | 35    | 73678  | <i>accD</i> gene |
| 474   | 73168  | F | 474   | 73228  | <i>accD</i> gene |
| 414   | 73168  | F | 414   | 73288  | <i>accD</i> gene |
| 354   | 73168  | F | 354   | 73348  | <i>accD</i> gene |
| 294   | 73168  | F | 294   | 73408  | <i>accD</i> gene |
| 234   | 73168  | F | 234   | 73468  | <i>accD</i> gene |
| 174   | 73168  | F | 174   | 73528  | <i>accD</i> gene |
| 114   | 73168  | F | 114   | 73588  | <i>accD</i> gene |
| 54    | 73168  | F | 54    | 73648  | <i>accD</i> gene |
| 476   | 73179  | F | 476   | 73239  | <i>accD</i> gene |
| 416   | 73179  | F | 416   | 73299  | <i>accD</i> gene |
| 356   | 73179  | F | 356   | 73359  | <i>accD</i> gene |
| 296   | 73179  | F | 296   | 73419  | <i>accD</i> gene |
| 236   | 73179  | F | 236   | 73479  | <i>accD</i> gene |
| 176   | 73179  | F | 176   | 73539  | <i>accD</i> gene |
| 116   | 73179  | F | 116   | 73599  | <i>accD</i> gene |
| 56    | 73179  | F | 56    | 73659  | <i>accD</i> gene |
| 73    | 73747  | F | 73    | 73810  | <i>accD</i> gene |
| 39    | 73903  | F | 39    | 73918  | <i>accD</i> gene |
| 30591 | 89718  | P | 30591 | 133184 | IR               |
| 49    | 97835  | P | 49    | 97835  | IR:IG            |
| 49    | 97835  | F | 49    | 155609 | IR:IG            |
| 40    | 101889 | F | 40    | 130830 | IR:IG            |
| 105   | 103828 | F | 105   | 103952 | IR:IG            |
| 105   | 103828 | P | 105   | 149436 | IR:IG            |
| 49    | 103881 | F | 49    | 103907 | IR:IG            |
| 49    | 103881 | P | 49    | 149537 | IR:IG            |
| 34    | 103896 | F | 34    | 103922 | IR:IG            |
| 34    | 103896 | P | 34    | 149537 | IR:IG            |
| 49    | 103907 | F | 49    | 104005 | IR:IG            |
| 49    | 103907 | P | 49    | 149439 | IR:IG            |
| 49    | 103907 | P | 49    | 149563 | IR:IG            |
| 34    | 103922 | F | 34    | 104020 | IR:IG            |
| 34    | 103922 | P | 34    | 149439 | IR:IG            |
| 34    | 103922 | P | 34    | 149563 | IR:IG            |
| 105   | 103952 | P | 105   | 149560 | IR:IG            |
| 49    | 104005 | P | 49    | 149537 | IR:IG            |
| 34    | 104020 | P | 34    | 149537 | IR:IG            |
| 86    | 105891 | F | 86    | 106211 | IR:IG            |
| 86    | 105891 | P | 86    | 147196 | IR:IG            |
| 163   | 105906 | F | 163   | 106068 | IR:IG            |
| 163   | 105906 | P | 163   | 147262 | IR:IG            |
| 163   | 106068 | P | 163   | 147424 | IR:IG            |

|     |        |   |     |        |                  |
|-----|--------|---|-----|--------|------------------|
| 67  | 106068 | F | 67  | 106226 | IR:IG            |
| 67  | 106068 | P | 67  | 147200 | IR:IG            |
| 86  | 106211 | P | 86  | 147516 | IR:IG            |
| 67  | 106226 | P | 67  | 147358 | IR:IG            |
| 66  | 112716 | F | 66  | 112742 | IR:IG            |
| 66  | 112716 | P | 66  | 140685 | IR:IG            |
| 38  | 112718 | F | 38  | 112770 | IR:IG            |
| 38  | 112718 | P | 38  | 140685 | IR:IG            |
| 43  | 112739 | F | 43  | 112765 | IR:IG            |
| 43  | 112739 | P | 43  | 140685 | IR:IG            |
| 66  | 112742 | P | 66  | 140711 | IR:IG            |
| 43  | 112765 | P | 43  | 140711 | IR:IG            |
| 38  | 112770 | P | 38  | 140737 | IR:IG            |
| 77  | 112959 | F | 77  | 113219 | IR:IG            |
| 77  | 112959 | P | 77  | 140197 | IR:IG            |
| 95  | 112994 | F | 95  | 113140 | IR:IG            |
| 95  | 112994 | P | 95  | 140258 | IR:IG            |
| 95  | 113140 | P | 95  | 140404 | IR:IG            |
| 42  | 113140 | F | 42  | 113254 | IR:IG            |
| 42  | 113140 | P | 42  | 140197 | IR:IG            |
| 77  | 113219 | P | 77  | 140457 | IR:IG            |
| 42  | 113254 | P | 42  | 140311 | IR:IG            |
| 41  | 116021 | F | 41  | 116042 | <i>ycf1</i> gene |
| 41  | 116021 | P | 41  | 137410 | <i>ycf1</i> gene |
| 41  | 116042 | P | 41  | 137431 | <i>ycf1</i> gene |
| 41  | 116136 | F | 41  | 116154 | <i>ycf1</i> gene |
| 41  | 116136 | P | 41  | 137298 | <i>ycf1</i> gene |
| 41  | 116154 | P | 41  | 137316 | <i>ycf1</i> gene |
| 61  | 127376 | P | 61  | 127376 | SSC:IG           |
| 39  | 129493 | C | 39  | 129494 | SSC:IG           |
| 38  | 129493 | F | 38  | 129495 | SSC:IG           |
| 40  | 130830 | P | 40  | 151564 | <i>ndhA</i> gene |
| 41  | 137298 | F | 41  | 137316 | <i>ycf1</i> gene |
| 41  | 137410 | F | 41  | 137431 | <i>ycf1</i> gene |
| 77  | 140197 | F | 77  | 140457 | <i>ycf1</i> gene |
| 42  | 140197 | F | 42  | 140311 | <i>ycf1</i> gene |
| 95  | 140258 | F | 95  | 140404 | IR:IG            |
| 66  | 140685 | F | 66  | 140711 | IR:IG            |
| 38  | 140685 | F | 38  | 140737 | IR:IG            |
| 86  | 147196 | F | 86  | 147516 | <i>trnI</i> gene |
| 67  | 147200 | F | 67  | 147358 | <i>trnI</i> gene |
| 163 | 147262 | F | 163 | 147424 | IR:IG            |
| 105 | 149436 | F | 105 | 149560 | IR:IG            |
| 49  | 149439 | F | 49  | 149537 | IR:IG            |

|    |        |   |    |        |       |
|----|--------|---|----|--------|-------|
| 49 | 149537 | F | 49 | 149563 | IR:IG |
| 49 | 155609 | P | 49 | 155609 | IR:IG |

*Passiflora rhamnifolia*

| Repeat Length 1 | Start Repeat 1 | Orientation | Repeat Length 2 | Start Repeat 2 | Location in cp genome |
|-----------------|----------------|-------------|-----------------|----------------|-----------------------|
| 32              | 6967           | F           | 32              | 6993           | LSC:IG                |
| 37              | 7405           | P           | 37              | 7405           | LSC:IG                |
| 61              | 9221           | F           | 61              | 9235           | LSC:IG                |
| 55              | 9221           | R           | 55              | 9221           | LSC:IG                |
| 57              | 9221           | R           | 57              | 9235           | LSC:IG                |
| 56              | 9221           | P           | 56              | 9235           | LSC:IG                |
| 56              | 9221           | C           | 56              | 9236           | LSC:IG                |
| 55              | 9221           | R           | 55              | 9235           | LSC:IG                |
| 55              | 9221           | F           | 55              | 9237           | LSC:IG                |
| 54              | 9221           | P           | 54              | 9235           | LSC:IG                |
| 54              | 9221           | C           | 54              | 9238           | LSC:IG                |
| 53              | 9221           | R           | 53              | 9235           | LSC:IG                |
| 53              | 9221           | F           | 53              | 9239           | LSC:IG                |
| 52              | 9221           | P           | 52              | 9235           | LSC:IG                |
| 52              | 9221           | C           | 52              | 9240           | LSC:IG                |
| 51              | 9221           | R           | 51              | 9235           | LSC:IG                |
| 51              | 9221           | F           | 51              | 9241           | LSC:IG                |
| 50              | 9221           | P           | 50              | 9235           | LSC:IG                |
| 50              | 9221           | C           | 50              | 9242           | LSC:IG                |
| 49              | 9221           | R           | 49              | 9235           | LSC:IG                |
| 49              | 9221           | F           | 49              | 9243           | LSC:IG                |
| 48              | 9221           | P           | 48              | 9235           | LSC:IG                |
| 48              | 9221           | C           | 48              | 9244           | LSC:IG                |
| 47              | 9221           | R           | 47              | 9235           | LSC:IG                |
| 47              | 9221           | F           | 47              | 9249           | LSC:IG                |
| 46              | 9221           | P           | 46              | 9235           | LSC:IG                |
| 46              | 9221           | C           | 46              | 9250           | LSC:IG                |
| 45              | 9221           | R           | 45              | 9235           | LSC:IG                |
| 45              | 9221           | F           | 45              | 9251           | LSC:IG                |
| 44              | 9221           | P           | 44              | 9235           | LSC:IG                |
| 44              | 9221           | C           | 44              | 9252           | LSC:IG                |
| 41              | 9221           | R           | 41              | 9221           | LSC:IG                |
| 43              | 9221           | R           | 43              | 9235           | LSC:IG                |
| 43              | 9221           | F           | 43              | 9253           | LSC:IG                |
| 42              | 9221           | P           | 42              | 9235           | LSC:IG                |
| 42              | 9221           | C           | 42              | 9254           | LSC:IG                |
| 41              | 9221           | F           | 41              | 9255           | LSC:IG                |
| 40              | 9221           | P           | 40              | 9235           | LSC:IG                |

|    |      |   |    |      |        |
|----|------|---|----|------|--------|
| 40 | 9221 | C | 40 | 9256 | LSC:IG |
| 39 | 9221 | R | 39 | 9235 | LSC:IG |
| 39 | 9221 | F | 39 | 9257 | LSC:IG |
| 39 | 9221 | F | 39 | 9265 | LSC:IG |
| 39 | 9221 | F | 39 | 9399 | LSC:IG |
| 39 | 9221 | F | 39 | 9439 | LSC:IG |
| 33 | 9221 | R | 33 | 9433 | LSC:IG |
| 38 | 9221 | P | 38 | 9235 | LSC:IG |
| 38 | 9221 | C | 38 | 9258 | LSC:IG |
| 37 | 9221 | R | 37 | 9235 | LSC:IG |
| 37 | 9221 | F | 37 | 9259 | LSC:IG |
| 36 | 9221 | P | 36 | 9235 | LSC:IG |
| 36 | 9221 | C | 36 | 9260 | LSC:IG |
| 33 | 9221 | R | 33 | 9355 | LSC:IG |
| 35 | 9221 | R | 35 | 9235 | LSC:IG |
| 35 | 9221 | F | 35 | 9261 | LSC:IG |
| 57 | 9222 | C | 57 | 9235 | LSC:IG |
| 57 | 9222 | P | 57 | 9235 | LSC:IG |
| 47 | 9222 | C | 47 | 9249 | LSC:IG |
| 57 | 9223 | R | 57 | 9235 | LSC:IG |
| 57 | 9223 | F | 57 | 9235 | LSC:IG |
| 47 | 9223 | F | 47 | 9249 | LSC:IG |
| 57 | 9224 | C | 57 | 9235 | LSC:IG |
| 57 | 9224 | P | 57 | 9235 | LSC:IG |
| 47 | 9224 | C | 47 | 9249 | LSC:IG |
| 57 | 9225 | R | 57 | 9235 | LSC:IG |
| 57 | 9225 | F | 57 | 9235 | LSC:IG |
| 47 | 9225 | F | 47 | 9249 | LSC:IG |
| 57 | 9226 | C | 57 | 9235 | LSC:IG |
| 57 | 9226 | P | 57 | 9235 | LSC:IG |
| 57 | 9227 | R | 57 | 9235 | LSC:IG |
| 57 | 9227 | F | 57 | 9235 | LSC:IG |
| 57 | 9228 | C | 57 | 9235 | LSC:IG |
| 57 | 9229 | F | 57 | 9235 | LSC:IG |
| 55 | 9229 | R | 55 | 9249 | LSC:IG |
| 47 | 9229 | F | 47 | 9249 | LSC:IG |
| 33 | 9229 | F | 33 | 9433 | LSC:IG |
| 33 | 9229 | F | 33 | 9355 | LSC:IG |
| 57 | 9230 | C | 57 | 9235 | LSC:IG |
| 47 | 9230 | C | 47 | 9249 | LSC:IG |
| 47 | 9231 | F | 47 | 9249 | LSC:IG |
| 35 | 9233 | F | 35 | 9431 | LSC:IG |
| 56 | 9235 | P | 56 | 9235 | LSC:IG |
| 56 | 9235 | C | 56 | 9236 | LSC:IG |



|    |      |   |    |      |        |
|----|------|---|----|------|--------|
| 55 | 9235 | R | 55 | 9235 | LSC:IG |
| 55 | 9235 | F | 55 | 9237 | LSC:IG |
| 57 | 9235 | F | 57 | 9239 | LSC:IG |
| 54 | 9235 | P | 54 | 9235 | LSC:IG |
| 54 | 9235 | C | 54 | 9238 | LSC:IG |
| 53 | 9235 | F | 53 | 9243 | LSC:IG |
| 52 | 9235 | C | 52 | 9244 | LSC:IG |
| 51 | 9235 | F | 51 | 9245 | LSC:IG |
| 47 | 9235 | F | 47 | 9249 | LSC:IG |
| 46 | 9235 | C | 46 | 9250 | LSC:IG |
| 45 | 9235 | F | 45 | 9251 | LSC:IG |
| 44 | 9235 | C | 44 | 9252 | LSC:IG |
| 39 | 9235 | F | 39 | 9257 | LSC:IG |
| 41 | 9235 | F | 41 | 9279 | LSC:IG |
| 38 | 9235 | C | 38 | 9258 | LSC:IG |
| 37 | 9235 | F | 37 | 9259 | LSC:IG |
| 36 | 9235 | C | 36 | 9260 | LSC:IG |
| 35 | 9235 | F | 35 | 9261 | LSC:IG |
| 34 | 9235 | C | 34 | 9262 | LSC:IG |
| 33 | 9235 | F | 33 | 9263 | LSC:IG |
| 33 | 9235 | R | 33 | 9433 | LSC:IG |
| 32 | 9235 | C | 32 | 9264 | LSC:IG |
| 56 | 9236 | P | 56 | 9236 | LSC:IG |
| 47 | 9236 | C | 47 | 9249 | LSC:IG |
| 55 | 9237 | R | 55 | 9237 | LSC:IG |
| 47 | 9237 | F | 47 | 9249 | LSC:IG |
| 54 | 9238 | P | 54 | 9238 | LSC:IG |
| 54 | 9238 | P | 54 | 9242 | LSC:IG |
| 47 | 9238 | C | 47 | 9249 | LSC:IG |
| 53 | 9239 | R | 53 | 9243 | LSC:IG |
| 47 | 9243 | F | 47 | 9249 | LSC:IG |
| 49 | 9243 | R | 49 | 9255 | LSC:IG |
| 33 | 9243 | F | 33 | 9433 | LSC:IG |
| 47 | 9244 | C | 47 | 9249 | LSC:IG |
| 51 | 9245 | R | 51 | 9245 | LSC:IG |
| 30 | 9247 | C | 30 | 9793 | LSC:IG |
| 34 | 9248 | R | 34 | 9433 | LSC:IG |
| 30 | 9248 | R | 30 | 9397 | LSC:IG |
| 42 | 9249 | P | 42 | 9249 | LSC:IG |
| 42 | 9249 | C | 42 | 9250 | LSC:IG |
| 41 | 9249 | R | 41 | 9249 | LSC:IG |
| 41 | 9249 | F | 41 | 9251 | LSC:IG |
| 40 | 9249 | P | 40 | 9249 | LSC:IG |
| 40 | 9249 | C | 40 | 9252 | LSC:IG |

|    |      |   |    |      |        |
|----|------|---|----|------|--------|
| 39 | 9249 | R | 39 | 9249 | LSC:IG |
| 39 | 9249 | F | 39 | 9253 | LSC:IG |
| 35 | 9249 | F | 35 | 9257 | LSC:IG |
| 34 | 9249 | C | 34 | 9258 | LSC:IG |
| 43 | 9249 | F | 43 | 9261 | LSC:IG |
| 33 | 9249 | F | 33 | 9259 | LSC:IG |
| 42 | 9249 | C | 42 | 9262 | LSC:IG |
| 32 | 9249 | C | 32 | 9260 | LSC:IG |
| 41 | 9249 | F | 41 | 9263 | LSC:IG |
| 40 | 9249 | C | 40 | 9264 | LSC:IG |
| 39 | 9249 | F | 39 | 9265 | LSC:IG |
| 38 | 9249 | C | 38 | 9266 | LSC:IG |
| 37 | 9249 | F | 37 | 9267 | LSC:IG |
| 36 | 9249 | C | 36 | 9268 | LSC:IG |
| 33 | 9249 | F | 33 | 9433 | LSC:IG |
| 30 | 9249 | C | 30 | 9793 | LSC:IG |
| 30 | 9249 | R | 30 | 9793 | LSC:IG |
| 35 | 9249 | F | 35 | 9269 | LSC:IG |
| 32 | 9249 | P | 32 | 9433 | LSC:IG |
| 32 | 9249 | C | 32 | 9434 | LSC:IG |
| 42 | 9250 | P | 42 | 9250 | LSC:IG |
| 33 | 9250 | C | 33 | 9433 | LSC:IG |
| 33 | 9250 | P | 33 | 9433 | LSC:IG |
| 30 | 9250 | P | 30 | 9793 | LSC:IG |
| 30 | 9250 | F | 30 | 9793 | LSC:IG |
| 41 | 9251 | R | 41 | 9251 | LSC:IG |
| 33 | 9251 | R | 33 | 9433 | LSC:IG |
| 33 | 9251 | F | 33 | 9433 | LSC:IG |
| 30 | 9251 | C | 30 | 9793 | LSC:IG |
| 30 | 9251 | R | 30 | 9793 | LSC:IG |
| 40 | 9252 | P | 40 | 9252 | LSC:IG |
| 33 | 9252 | C | 33 | 9433 | LSC:IG |
| 33 | 9252 | P | 33 | 9433 | LSC:IG |
| 30 | 9252 | P | 30 | 9793 | LSC:IG |
| 30 | 9252 | F | 30 | 9793 | LSC:IG |
| 39 | 9253 | R | 39 | 9253 | LSC:IG |
| 33 | 9253 | R | 33 | 9433 | LSC:IG |
| 33 | 9253 | F | 33 | 9433 | LSC:IG |
| 30 | 9253 | C | 30 | 9793 | LSC:IG |
| 30 | 9253 | R | 30 | 9793 | LSC:IG |
| 38 | 9254 | P | 38 | 9254 | LSC:IG |
| 38 | 9254 | P | 38 | 9266 | LSC:IG |
| 33 | 9254 | C | 33 | 9433 | LSC:IG |
| 33 | 9254 | P | 33 | 9433 | LSC:IG |

|    |      |   |    |      |        |
|----|------|---|----|------|--------|
| 30 | 9254 | P | 30 | 9793 | LSC:IG |
| 30 | 9254 | F | 30 | 9793 | LSC:IG |
| 33 | 9255 | R | 33 | 9433 | LSC:IG |
| 33 | 9255 | F | 33 | 9433 | LSC:IG |
| 30 | 9255 | C | 30 | 9793 | LSC:IG |
| 30 | 9255 | R | 30 | 9793 | LSC:IG |
| 36 | 9256 | P | 36 | 9256 | LSC:IG |
| 33 | 9256 | C | 33 | 9433 | LSC:IG |
| 33 | 9256 | P | 33 | 9433 | LSC:IG |
| 30 | 9256 | P | 30 | 9793 | LSC:IG |
| 30 | 9256 | F | 30 | 9793 | LSC:IG |
| 35 | 9257 | R | 35 | 9257 | LSC:IG |
| 33 | 9257 | R | 33 | 9433 | LSC:IG |
| 33 | 9257 | F | 33 | 9433 | LSC:IG |
| 30 | 9257 | C | 30 | 9793 | LSC:IG |
| 30 | 9257 | R | 30 | 9793 | LSC:IG |
| 34 | 9258 | P | 34 | 9258 | LSC:IG |
| 33 | 9258 | C | 33 | 9433 | LSC:IG |
| 33 | 9258 | P | 33 | 9433 | LSC:IG |
| 30 | 9258 | P | 30 | 9793 | LSC:IG |
| 30 | 9258 | F | 30 | 9793 | LSC:IG |
| 59 | 9259 | F | 59 | 9433 | LSC:IG |
| 33 | 9259 | R | 33 | 9259 | LSC:IG |
| 33 | 9259 | R | 33 | 9433 | LSC:IG |
| 30 | 9259 | C | 30 | 9793 | LSC:IG |
| 30 | 9259 | R | 30 | 9793 | LSC:IG |
| 32 | 9260 | P | 32 | 9260 | LSC:IG |
| 30 | 9260 | P | 30 | 9793 | LSC:IG |
| 30 | 9260 | F | 30 | 9793 | LSC:IG |
| 30 | 9261 | C | 30 | 9793 | LSC:IG |
| 30 | 9261 | R | 30 | 9793 | LSC:IG |
| 30 | 9262 | P | 30 | 9793 | LSC:IG |
| 30 | 9262 | F | 30 | 9793 | LSC:IG |
| 55 | 9263 | F | 55 | 9397 | LSC:IG |
| 35 | 9263 | R | 35 | 9391 | LSC:IG |
| 30 | 9264 | P | 30 | 9793 | LSC:IG |
| 35 | 9265 | F | 35 | 9361 | LSC:IG |
| 35 | 9265 | R | 35 | 9431 | LSC:IG |
| 30 | 9268 | P | 30 | 9793 | LSC:IG |
| 75 | 9271 | F | 75 | 9299 | LSC:IG |
| 47 | 9271 | F | 47 | 9327 | LSC:IG |
| 35 | 9271 | R | 35 | 9431 | LSC:IG |
| 39 | 9279 | F | 39 | 9413 | LSC:IG |
| 39 | 9279 | F | 39 | 9453 | LSC:IG |

|    |       |   |    |        |                   |
|----|-------|---|----|--------|-------------------|
| 52 | 9294  | F | 52 | 9322   | LSC:IG            |
| 39 | 9307  | F | 39 | 9413   | LSC:IG            |
| 39 | 9307  | F | 39 | 9453   | LSC:IG            |
| 37 | 9311  | F | 37 | 9379   | LSC:IG            |
| 77 | 9335  | F | 77 | 9413   | LSC:IG            |
| 39 | 9335  | F | 39 | 9453   | LSC:IG            |
| 37 | 9335  | F | 37 | 9375   | LSC:IG            |
| 51 | 9361  | F | 51 | 9399   | LSC:IG            |
| 33 | 9379  | F | 33 | 9417   | LSC:IG            |
| 33 | 9379  | F | 33 | 9457   | LSC:IG            |
| 53 | 9399  | F | 53 | 9439   | LSC:IG            |
| 35 | 9399  | R | 35 | 9431   | LSC:IG            |
| 30 | 9487  | F | 30 | 9501   | LSC:IG            |
| 31 | 9489  | F | 31 | 9520   | LSC:IG            |
| 33 | 9790  | F | 33 | 128844 | LSC:IG            |
| 34 | 9791  | P | 34 | 9791   | LSC:IG            |
| 35 | 9792  | R | 35 | 9792   | LSC:IG            |
| 30 | 9794  | P | 30 | 9794   | LSC:IG            |
| 43 | 21540 | F | 43 | 21561  | <i>rpoC1</i> gene |
| 31 | 26801 | R | 31 | 26801  | LSC:IG            |
| 39 | 31525 | F | 39 | 31556  | LSC:IG            |
| 81 | 39634 | F | 81 | 41858  | <i>psaB</i> gene  |
| 42 | 44666 | F | 42 | 130223 | <i>ycf3</i> gene  |
| 39 | 44669 | F | 39 | 101929 | <i>ycf3</i> gene  |
| 39 | 44669 | P | 39 | 150314 | <i>ycf3</i> gene  |
| 33 | 45736 | P | 33 | 45736  | LSC:IG            |
| 40 | 47070 | F | 40 | 47091  | LSC:IG            |
| 38 | 47081 | R | 38 | 47081  | LSC:IG            |
| 39 | 47081 | P | 39 | 47081  | LSC:IG            |
| 46 | 54584 | P | 46 | 54584  | LSC:IG            |
| 32 | 59236 | R | 32 | 59236  | <i>clpP</i> gene  |
| 37 | 59239 | R | 37 | 59239  | <i>clpP</i> gene  |
| 33 | 61819 | F | 33 | 61894  | LSC:IG            |
| 38 | 61853 | F | 38 | 61913  | <i>rps18</i> gene |
| 40 | 61866 | F | 40 | 62016  | <i>rps18</i> gene |
| 35 | 61871 | F | 35 | 61991  | <i>rps18</i> gene |
| 46 | 61877 | F | 46 | 62087  | <i>rps18</i> gene |
| 35 | 61877 | F | 35 | 61952  | <i>rps18</i> gene |
| 46 | 61926 | F | 46 | 62046  | <i>rps18</i> gene |
| 71 | 61931 | F | 71 | 61976  | <i>rps18</i> gene |
| 65 | 61931 | F | 65 | 62066  | <i>rps18</i> gene |
| 61 | 61941 | F | 61 | 61986  | <i>rps18</i> gene |
| 55 | 61941 | F | 55 | 62076  | <i>rps18</i> gene |
| 40 | 61941 | F | 40 | 62091  | <i>rps18</i> gene |

|    |       |   |    |       |                   |
|----|-------|---|----|-------|-------------------|
| 43 | 61944 | F | 43 | 61974 | <i>rps18</i> gene |
| 71 | 61946 | F | 71 | 62021 | <i>rps18</i> gene |
| 50 | 61952 | F | 50 | 61997 | <i>rps18</i> gene |
| 50 | 61952 | F | 50 | 62057 | <i>rps18</i> gene |
| 35 | 61952 | F | 35 | 61982 | <i>rps18</i> gene |
| 35 | 61952 | F | 35 | 62072 | <i>rps18</i> gene |
| 43 | 61959 | F | 43 | 61974 | <i>rps18</i> gene |
| 59 | 61961 | F | 59 | 62051 | <i>rps18</i> gene |
| 73 | 61974 | F | 73 | 62004 | <i>rps18</i> gene |
| 58 | 61974 | F | 58 | 62064 | <i>rps18</i> gene |
| 46 | 61974 | F | 46 | 62079 | <i>rps18</i> gene |
| 43 | 61974 | F | 43 | 61989 | <i>rps18</i> gene |
| 43 | 61974 | F | 43 | 62034 | <i>rps18</i> gene |
| 41 | 61976 | F | 41 | 62051 | <i>rps18</i> gene |
| 41 | 61976 | F | 41 | 62021 | <i>rps18</i> gene |
| 44 | 61982 | F | 44 | 62087 | <i>rps18</i> gene |
| 56 | 61991 | F | 56 | 62021 | <i>rps18</i> gene |
| 35 | 61991 | F | 35 | 62051 | <i>rps18</i> gene |
| 44 | 61997 | F | 44 | 62087 | <i>rps18</i> gene |
| 35 | 62006 | F | 35 | 62051 | <i>rps18</i> gene |
| 41 | 62021 | F | 41 | 62081 | <i>rps18</i> gene |
| 35 | 62021 | F | 35 | 62096 | <i>rps18</i> gene |
| 35 | 62036 | F | 35 | 62051 | <i>rps18</i> gene |
| 41 | 62051 | F | 41 | 62066 | <i>rps18</i> gene |
| 35 | 62057 | F | 35 | 62087 | <i>rps18</i> gene |
| 44 | 62072 | F | 44 | 62087 | <i>rps18</i> gene |
| 53 | 62430 | F | 53 | 62448 | <i>rps18</i> gene |
| 35 | 62430 | F | 35 | 62466 | <i>rps18</i> gene |
| 30 | 62669 | F | 30 | 62749 | LSC:IG            |
| 30 | 62669 | F | 30 | 62798 | LSC:IG            |
| 30 | 62669 | F | 30 | 62847 | LSC:IG            |
| 30 | 62669 | F | 30 | 62896 | LSC:IG            |
| 30 | 62669 | F | 30 | 62945 | LSC:IG            |
| 30 | 62669 | F | 30 | 62994 | LSC:IG            |
| 30 | 62669 | F | 30 | 63043 | LSC:IG            |
| 30 | 62669 | F | 30 | 63120 | LSC:IG            |
| 69 | 62670 | F | 69 | 62710 | LSC:IG            |
| 59 | 62680 | F | 59 | 62769 | LSC:IG            |
| 59 | 62680 | F | 59 | 62818 | LSC:IG            |
| 59 | 62680 | F | 59 | 62867 | LSC:IG            |
| 59 | 62680 | F | 59 | 62916 | LSC:IG            |
| 59 | 62680 | F | 59 | 62965 | LSC:IG            |
| 59 | 62680 | F | 59 | 63014 | LSC:IG            |
| 58 | 62680 | F | 58 | 63063 | LSC:IG            |

|     |       |   |     |       |                  |
|-----|-------|---|-----|-------|------------------|
| 34  | 62680 | F | 34  | 63140 | LSC:IG           |
| 34  | 62705 | F | 34  | 63116 | LSC:IG           |
| 352 | 62720 | F | 352 | 62769 | LSC:IG           |
| 303 | 62720 | F | 303 | 62818 | LSC:IG           |
| 254 | 62720 | F | 254 | 62867 | LSC:IG           |
| 205 | 62720 | F | 205 | 62916 | LSC:IG           |
| 156 | 62720 | F | 156 | 62965 | LSC:IG           |
| 107 | 62720 | F | 107 | 63014 | LSC:IG           |
| 58  | 62720 | F | 58  | 63063 | LSC:IG           |
| 34  | 62720 | F | 34  | 63140 | LSC:IG           |
| 58  | 62745 | F | 58  | 63116 | LSC:IG           |
| 58  | 62794 | F | 58  | 63116 | LSC:IG           |
| 58  | 62843 | F | 58  | 63116 | LSC:IG           |
| 58  | 62892 | F | 58  | 63116 | LSC:IG           |
| 58  | 62941 | F | 58  | 63116 | LSC:IG           |
| 58  | 62990 | F | 58  | 63116 | LSC:IG           |
| 58  | 63039 | F | 58  | 63116 | LSC:IG           |
| 33  | 63088 | F | 33  | 63116 | LSC:IG           |
| 32  | 64745 | F | 32  | 64761 | LSC:IG           |
| 30  | 69485 | F | 30  | 69500 | LSC:IG           |
| 64  | 71130 | F | 64  | 71386 | LSC:IG           |
| 64  | 71130 | F | 64  | 71722 | LSC:IG           |
| 84  | 71198 | F | 84  | 71454 | LSC:IG           |
| 84  | 71198 | F | 84  | 71790 | LSC:IG           |
| 486 | 71201 | F | 486 | 71537 | LSC:IG           |
| 150 | 71201 | F | 150 | 71873 | LSC:IG           |
| 452 | 71235 | F | 452 | 71571 | LSC:IG           |
| 116 | 71235 | F | 116 | 71907 | LSC:IG           |
| 31  | 71362 | F | 31  | 72023 | LSC:IG           |
| 81  | 71457 | F | 81  | 71537 | LSC:IG           |
| 81  | 71457 | F | 81  | 71873 | LSC:IG           |
| 47  | 71491 | F | 47  | 71571 | LSC:IG           |
| 47  | 71491 | F | 47  | 71907 | LSC:IG           |
| 81  | 71537 | F | 81  | 71793 | LSC:IG           |
| 47  | 71571 | F | 47  | 71827 | LSC:IG           |
| 31  | 71698 | F | 31  | 72023 | LSC:IG           |
| 81  | 71793 | F | 81  | 71873 | LSC:IG           |
| 47  | 71827 | F | 47  | 71907 | LSC:IG           |
| 120 | 73341 | F | 120 | 73722 | <i>accD</i> gene |
| 39  | 73383 | F | 39  | 73398 | <i>accD</i> gene |
| 39  | 73383 | F | 39  | 73779 | <i>accD</i> gene |
| 39  | 73398 | F | 39  | 73764 | <i>accD</i> gene |
| 36  | 73515 | F | 36  | 73530 | <i>accD</i> gene |
| 67  | 73542 | F | 67  | 73572 | <i>accD</i> gene |

|       |        |   |       |        |                  |
|-------|--------|---|-------|--------|------------------|
| 35    | 73542  | F | 35    | 73602  | <i>accD</i> gene |
| 31    | 73578  | F | 31    | 73608  | <i>accD</i> gene |
| 39    | 73764  | F | 39    | 73779  | <i>accD</i> gene |
| 61    | 74080  | F | 61    | 74110  | <i>accD</i> gene |
| 31    | 74080  | F | 31    | 74140  | <i>accD</i> gene |
| 47    | 74084  | F | 47    | 74216  | <i>accD</i> gene |
| 37    | 74094  | F | 37    | 74226  | <i>accD</i> gene |
| 47    | 74114  | F | 47    | 74216  | <i>accD</i> gene |
| 37    | 74124  | F | 37    | 74226  | <i>accD</i> gene |
| 63    | 74144  | F | 63    | 74180  | <i>accD</i> gene |
| 51    | 74144  | F | 51    | 74192  | <i>accD</i> gene |
| 41    | 74144  | F | 41    | 74156  | <i>accD</i> gene |
| 53    | 74154  | F | 53    | 74190  | <i>accD</i> gene |
| 47    | 74166  | F | 47    | 74178  | <i>accD</i> gene |
| 33    | 74174  | F | 33    | 74210  | <i>accD</i> gene |
| 34    | 74186  | R | 34    | 74186  | <i>accD</i> gene |
| 35    | 74190  | F | 35    | 74202  | <i>accD</i> gene |
| 35    | 74190  | R | 35    | 74205  | <i>accD</i> gene |
| 38    | 87771  | F | 38    | 87804  | LSC:IG           |
| 29616 | 90065  | P | 29616 | 132601 | IR               |
| 49    | 97875  | P | 49    | 97875  | IR:IG            |
| 49    | 97875  | F | 49    | 154358 | IR:IG            |
| 40    | 101929 | F | 40    | 130226 | IR:IG            |
| 66    | 112346 | F | 66    | 112372 | IR:IG            |
| 66    | 112346 | P | 66    | 139844 | IR:IG            |
| 38    | 112348 | F | 38    | 112400 | IR:IG            |
| 38    | 112348 | P | 38    | 139844 | IR:IG            |
| 43    | 112369 | F | 43    | 112395 | IR:IG            |
| 43    | 112369 | P | 43    | 139844 | IR:IG            |
| 66    | 112372 | P | 66    | 139870 | IR:IG            |
| 43    | 112395 | P | 43    | 139870 | IR:IG            |
| 38    | 112400 | P | 38    | 139896 | IR:IG            |
| 41    | 115391 | F | 41    | 115412 | <i>ycfI</i> gene |
| 41    | 115391 | P | 41    | 136829 | <i>ycfI</i> gene |
| 30    | 115402 | F | 30    | 115423 | <i>ycfI</i> gene |
| 30    | 115402 | P | 30    | 136829 | <i>ycfI</i> gene |
| 41    | 115412 | P | 41    | 136850 | <i>ycfI</i> gene |
| 30    | 115423 | P | 30    | 136850 | <i>ycfI</i> gene |
| 41    | 115506 | F | 41    | 115524 | <i>ycfI</i> gene |
| 41    | 115506 | P | 41    | 136717 | <i>ycfI</i> gene |
| 41    | 115524 | P | 41    | 136735 | <i>ycfI</i> gene |
| 61    | 126731 | P | 61    | 126731 | SSC:IG           |
| 32    | 128651 | F | 32    | 128665 | SSC:IG           |
| 55    | 128861 | F | 55    | 128880 | SSC:IG           |

|    |        |   |    |        |                  |
|----|--------|---|----|--------|------------------|
| 36 | 128861 | F | 36 | 128899 | SSC:IG           |
| 40 | 130226 | P | 40 | 150313 | <i>ndhA</i> gene |
| 41 | 136717 | F | 41 | 136735 | <i>ycf1</i> gene |
| 38 | 136730 | F | 38 | 136748 | <i>ycf1</i> gene |
| 41 | 136829 | F | 41 | 136850 | <i>ycf1</i> gene |
| 66 | 139844 | F | 66 | 139870 | IR:IG            |
| 38 | 139844 | F | 38 | 139896 | IR:IG            |
| 49 | 154358 | P | 49 | 154358 | IR:IG            |

*Passiflora candollei*

| Repeat Length 1 | Start Repeat 1 | Orientation | Repeat Length 2 | Start Repeat 2 | Location in cp genome |
|-----------------|----------------|-------------|-----------------|----------------|-----------------------|
| 48              | 2540           | P           | 48              | 2540           | LSC:IG                |
| 31              | 5430           | F           | 31              | 5442           | LSC:IG                |
| 30              | 6699           | F           | 30              | 89411          | LSC:IG                |
| 30              | 6699           | P           | 30              | 121206         | LSC:IG                |
| 31              | 12355          | F           | 31              | 56455          | <i>trnK</i> gene      |
| 43              | 13635          | F           | 43              | 13659          | LSC:IG                |
| 43              | 14046          | F           | 43              | 14121          | LSC:IG                |
| 30              | 14730          | P           | 30              | 51576          | LSC:IG                |
| 33              | 14999          | P           | 33              | 14999          | LSC:IG                |
| 39              | 16046          | P           | 39              | 87740          | <i>ycf3</i> gene      |
| 39              | 16046          | F           | 39              | 122868         | <i>ycf3</i> gene      |
| 42              | 16046          | P           | 42              | 108799         | <i>ycf3</i> gene      |
| 81              | 18987          | F           | 81              | 21211          | <i>psaA</i> gene      |
| 67              | 19001          | F           | 67              | 21225          | <i>psaA</i> gene      |
| 49              | 19029          | F           | 49              | 21253          | <i>psaA</i> gene      |
| 35              | 19043          | F           | 35              | 21267          | <i>psaA</i> gene      |
| 30              | 23454          | F           | 30              | 49947          | <i>trnG</i> gene      |
| 31              | 29879          | P           | 31              | 29879          | LSC:IG                |
| 30              | 47021          | P           | 30              | 47021          | LSC:IG                |
| 30              | 49495          | P           | 30              | 72765          | LSC:IG                |
| 30              | 49495          | F           | 30              | 137852         | LSC:IG                |
| 47              | 51012          | P           | 47              | 51012          | LSC:IG                |
| 56              | 56581          | F           | 56              | 56633          | LSC:IG                |
| 36              | 56941          | F           | 36              | 57154          | <i>rps18</i> gene     |
| 32              | 56969          | F           | 32              | 57014          | <i>rps18</i> gene     |
| 74              | 56972          | F           | 74              | 57032          | <i>rps18</i> gene     |
| 30              | 56972          | F           | 30              | 57077          | <i>rps18</i> gene     |
| 34              | 56993          | F           | 34              | 57140          | <i>rps18</i> gene     |
| 41              | 57005          | F           | 41              | 57020          | <i>rps18</i> gene     |
| 44              | 57008          | F           | 44              | 57053          | <i>rps18</i> gene     |
| 42              | 57020          | F           | 42              | 57065          | <i>rps18</i> gene     |
| 34              | 57053          | F           | 34              | 57140          | <i>rps18</i> gene     |



|       |       |   |       |        |                   |
|-------|-------|---|-------|--------|-------------------|
| 34    | 57068 | F | 34    | 57140  | <i>rps18</i> gene |
| 43    | 57105 | F | 43    | 57120  | <i>rps18</i> gene |
| 35    | 57795 | F | 35    | 65938  | LSC:IG            |
| 61    | 57815 | F | 61    | 65958  | LSC:IG            |
| 45    | 57831 | F | 45    | 65974  | LSC:IG            |
| 41    | 67468 | P | 41    | 67468  | <i>accD</i> gene  |
| 41    | 68162 | F | 41    | 68195  | <i>accD</i> gene  |
| 165   | 68686 | F | 165   | 68716  | <i>accD</i> gene  |
| 135   | 68686 | F | 135   | 68746  | <i>accD</i> gene  |
| 105   | 68686 | F | 105   | 68776  | <i>accD</i> gene  |
| 75    | 68686 | F | 75    | 68806  | <i>accD</i> gene  |
| 45    | 68686 | F | 45    | 68836  | <i>accD</i> gene  |
| 52    | 68709 | F | 52    | 68829  | <i>accD</i> gene  |
| 52    | 68739 | F | 52    | 68829  | <i>accD</i> gene  |
| 52    | 68769 | F | 52    | 68829  | <i>accD</i> gene  |
| 52    | 68799 | F | 52    | 68829  | <i>accD</i> gene  |
| 30    | 71951 | F | 30    | 71997  | <i>trnV</i> gene  |
| 64    | 72045 | F | 64    | 72097  | LSC:IG            |
| 30    | 72045 | F | 30    | 72149  | LSC:IG            |
| 68    | 72059 | F | 68    | 72111  | LSC:IG            |
| 42    | 72076 | F | 42    | 72220  | LSC:IG            |
| 42    | 72128 | F | 42    | 72220  | LSC:IG            |
| 26005 | 72566 | P | 26005 | 112076 | IR                |
| 201   | 75099 | F | 201   | 75254  | IR:IG             |
| 201   | 75099 | P | 201   | 135192 | IR:IG             |
| 46    | 75099 | F | 46    | 75409  | IR:IG             |
| 46    | 75099 | P | 46    | 135192 | IR:IG             |
| 39    | 75099 | F | 39    | 75173  | IR:IG             |
| 39    | 75099 | F | 39    | 75328  | IR:IG             |
| 39    | 75099 | P | 39    | 135280 | IR:IG             |
| 39    | 75099 | P | 39    | 135435 | IR:IG             |
| 94    | 75118 | F | 94    | 75199  | IR:IG             |
| 94    | 75118 | F | 94    | 75354  | IR:IG             |
| 94    | 75118 | P | 94    | 135199 | IR:IG             |
| 94    | 75118 | P | 94    | 135354 | IR:IG             |
| 83    | 75129 | F | 83    | 75210  | IR:IG             |
| 83    | 75129 | F | 83    | 75365  | IR:IG             |
| 83    | 75129 | P | 83    | 135199 | IR:IG             |
| 83    | 75129 | P | 83    | 135354 | IR:IG             |
| 39    | 75173 | P | 39    | 135509 | IR:IG             |
| 94    | 75199 | F | 94    | 75273  | IR:IG             |
| 94    | 75199 | P | 94    | 135280 | IR:IG             |
| 94    | 75199 | P | 94    | 135435 | IR:IG             |
| 83    | 75210 | F | 83    | 75284  | IR:IG             |

|     |       |   |     |        |                   |
|-----|-------|---|-----|--------|-------------------|
| 83  | 75210 | P | 83  | 135280 | IR:IG             |
| 83  | 75210 | P | 83  | 135435 | IR:IG             |
| 201 | 75254 | P | 201 | 135347 | IR:IG             |
| 94  | 75273 | F | 94  | 75354  | IR:IG             |
| 94  | 75273 | P | 94  | 135199 | IR:IG             |
| 94  | 75273 | P | 94  | 135354 | IR:IG             |
| 83  | 75284 | F | 83  | 75365  | IR:IG             |
| 83  | 75284 | P | 83  | 135199 | IR:IG             |
| 83  | 75284 | P | 83  | 135354 | IR:IG             |
| 39  | 75328 | P | 39  | 135509 | IR:IG             |
| 94  | 75354 | P | 94  | 135280 | IR:IG             |
| 94  | 75354 | P | 94  | 135435 | IR:IG             |
| 83  | 75365 | P | 83  | 135280 | IR:IG             |
| 83  | 75365 | P | 83  | 135435 | IR:IG             |
| 46  | 75409 | P | 46  | 135502 | IR:IG             |
| 38  | 79919 | F | 38  | 79982  | IR:IG             |
| 38  | 79919 | P | 38  | 130627 | IR:IG             |
| 38  | 79982 | P | 38  | 130690 | IR:IG             |
| 37  | 80074 | P | 37  | 80074  | <i>rps19</i> gene |
| 37  | 80074 | F | 37  | 130536 | <i>rps19</i> gene |
| 51  | 84123 | P | 51  | 84123  | IR:IG             |
| 51  | 84123 | F | 51  | 126473 | IR:IG             |
| 40  | 87740 | F | 40  | 108802 | IR:IG             |
| 30  | 87752 | F | 30  | 108814 | IR:IG             |
| 55  | 88590 | F | 55  | 88615  | IR:IG             |
| 55  | 88590 | P | 55  | 121977 | IR:IG             |
| 30  | 88590 | F | 30  | 88640  | IR:IG             |
| 30  | 88590 | P | 30  | 121977 | IR:IG             |
| 55  | 88615 | P | 55  | 122002 | IR:IG             |
| 30  | 88640 | P | 30  | 122027 | IR:IG             |
| 45  | 95042 | F | 45  | 95070  | <i>rrn23</i> gene |
| 45  | 95042 | P | 45  | 115532 | <i>rrn23</i> gene |
| 44  | 95044 | F | 44  | 95184  | <i>rrn23</i> gene |
| 44  | 95044 | P | 44  | 115419 | <i>rrn23</i> gene |
| 32  | 95057 | F | 32  | 95229  | <i>rrn23</i> gene |
| 32  | 95057 | P | 32  | 115386 | <i>rrn23</i> gene |
| 45  | 95070 | P | 45  | 115560 | <i>rrn23</i> gene |
| 55  | 95072 | F | 55  | 95184  | <i>rrn23</i> gene |
| 55  | 95072 | P | 55  | 115408 | <i>rrn23</i> gene |
| 63  | 95090 | F | 63  | 95234  | <i>rrn23</i> gene |
| 63  | 95090 | P | 63  | 115350 | <i>rrn23</i> gene |
| 62  | 95094 | F | 62  | 95120  | <i>rrn23</i> gene |
| 62  | 95094 | P | 62  | 115465 | <i>rrn23</i> gene |
| 36  | 95094 | F | 36  | 95146  | <i>rrn23</i> gene |

|    |        |   |    |        |                   |
|----|--------|---|----|--------|-------------------|
| 36 | 95094  | P | 36 | 115465 | <i>rrn23</i> gene |
| 33 | 95094  | F | 33 | 95264  | <i>rrn23</i> gene |
| 33 | 95094  | P | 33 | 115350 | <i>rrn23</i> gene |
| 46 | 95107  | F | 46 | 95251  | <i>rrn23</i> gene |
| 46 | 95107  | P | 46 | 115350 | <i>rrn23</i> gene |
| 40 | 95116  | F | 40 | 95142  | <i>rrn23</i> gene |
| 40 | 95116  | P | 40 | 115465 | <i>rrn23</i> gene |
| 37 | 95116  | F | 37 | 95260  | <i>rrn23</i> gene |
| 37 | 95116  | P | 37 | 115350 | <i>rrn23</i> gene |
| 62 | 95120  | P | 62 | 115491 | <i>rrn23</i> gene |
| 59 | 95120  | F | 59 | 95238  | <i>rrn23</i> gene |
| 59 | 95120  | P | 59 | 115350 | <i>rrn23</i> gene |
| 33 | 95120  | F | 33 | 95206  | <i>rrn23</i> gene |
| 33 | 95120  | P | 33 | 115408 | <i>rrn23</i> gene |
| 46 | 95133  | F | 46 | 95251  | <i>rrn23</i> gene |
| 46 | 95133  | P | 46 | 115350 | <i>rrn23</i> gene |
| 40 | 95142  | P | 40 | 115491 | <i>rrn23</i> gene |
| 36 | 95146  | F | 36 | 95238  | <i>rrn23</i> gene |
| 36 | 95146  | P | 36 | 115373 | <i>rrn23</i> gene |
| 36 | 95146  | P | 36 | 115517 | <i>rrn23</i> gene |
| 33 | 95146  | F | 33 | 95206  | <i>rrn23</i> gene |
| 33 | 95146  | P | 33 | 115408 | <i>rrn23</i> gene |
| 55 | 95184  | P | 55 | 115520 | <i>rrn23</i> gene |
| 44 | 95184  | P | 44 | 115559 | <i>rrn23</i> gene |
| 42 | 95197  | F | 42 | 95229  | <i>rrn23</i> gene |
| 42 | 95197  | P | 42 | 115376 | <i>rrn23</i> gene |
| 33 | 95206  | F | 33 | 95264  | <i>rrn23</i> gene |
| 33 | 95206  | P | 33 | 115350 | <i>rrn23</i> gene |
| 33 | 95206  | P | 33 | 115468 | <i>rrn23</i> gene |
| 33 | 95206  | P | 33 | 115494 | <i>rrn23</i> gene |
| 42 | 95229  | P | 42 | 115408 | <i>rrn23</i> gene |
| 32 | 95229  | P | 32 | 115558 | <i>rrn23</i> gene |
| 63 | 95234  | P | 63 | 115494 | <i>rrn23</i> gene |
| 59 | 95238  | P | 59 | 115468 | <i>rrn23</i> gene |
| 36 | 95238  | P | 36 | 115465 | <i>rrn23</i> gene |
| 33 | 95238  | F | 33 | 95264  | <i>rrn23</i> gene |
| 33 | 95238  | P | 33 | 115350 | <i>rrn23</i> gene |
| 46 | 95251  | P | 46 | 115468 | <i>rrn23</i> gene |
| 46 | 95251  | P | 46 | 115494 | <i>rrn23</i> gene |
| 37 | 95260  | P | 37 | 115494 | <i>rrn23</i> gene |
| 33 | 95264  | P | 33 | 115408 | <i>rrn23</i> gene |
| 33 | 95264  | P | 33 | 115376 | <i>rrn23</i> gene |
| 33 | 95264  | P | 33 | 115520 | <i>rrn23</i> gene |
| 33 | 102609 | P | 33 | 102609 | SSC:IG            |

|     |        |   |     |        |                   |
|-----|--------|---|-----|--------|-------------------|
| 40  | 108802 | P | 40  | 122867 | <i>ndhA</i> gene  |
| 30  | 108814 | P | 30  | 122865 | <i>ndhA</i> gene  |
| 63  | 115350 | F | 63  | 115494 | <i>rrn23</i> gene |
| 59  | 115350 | F | 59  | 115468 | <i>rrn23</i> gene |
| 33  | 115350 | F | 33  | 115408 | <i>rrn23</i> gene |
| 33  | 115350 | F | 33  | 115376 | <i>rrn23</i> gene |
| 33  | 115350 | F | 33  | 115520 | <i>rrn23</i> gene |
| 57  | 115361 | F | 57  | 115505 | <i>rrn23</i> gene |
| 48  | 115361 | F | 48  | 115479 | <i>rrn23</i> gene |
| 36  | 115373 | F | 36  | 115465 | <i>rrn23</i> gene |
| 42  | 115376 | F | 42  | 115408 | <i>rrn23</i> gene |
| 32  | 115386 | F | 32  | 115558 | <i>rrn23</i> gene |
| 31  | 115387 | F | 31  | 115419 | <i>rrn23</i> gene |
| 30  | 115388 | F | 30  | 115532 | <i>rrn23</i> gene |
| 55  | 115408 | F | 55  | 115520 | <i>rrn23</i> gene |
| 33  | 115408 | F | 33  | 115468 | <i>rrn23</i> gene |
| 33  | 115408 | F | 33  | 115494 | <i>rrn23</i> gene |
| 44  | 115419 | F | 44  | 115559 | <i>rrn23</i> gene |
| 43  | 115420 | F | 43  | 115532 | <i>rrn23</i> gene |
| 62  | 115465 | F | 62  | 115491 | <i>rrn23</i> gene |
| 36  | 115465 | F | 36  | 115517 | <i>rrn23</i> gene |
| 45  | 115532 | F | 45  | 115560 | <i>rrn23</i> gene |
| 55  | 121977 | F | 55  | 122002 | IR:IG             |
| 30  | 121977 | F | 30  | 122027 | IR:IG             |
| 51  | 126473 | P | 51  | 126473 | IR:IG             |
| 37  | 130536 | P | 37  | 130536 | IR:IG             |
| 38  | 130627 | F | 38  | 130690 | IR:IG             |
| 201 | 135192 | F | 201 | 135347 | IR:IG             |
| 46  | 135192 | F | 46  | 135502 | IR:IG             |
| 94  | 135199 | F | 94  | 135280 | IR:IG             |
| 94  | 135199 | F | 94  | 135435 | IR:IG             |
| 94  | 135280 | F | 94  | 135354 | IR:IG             |
| 39  | 135280 | F | 39  | 135509 | IR:IG             |
| 94  | 135354 | F | 94  | 135435 | IR:IG             |
| 39  | 135435 | F | 39  | 135509 | IR:IG             |

*Passiflora capsularis*

| Repeat Length 1 | Start Repeat 1 | Orientation | Repeat Length 2 | Start Repeat 2 | Location in cp genome |
|-----------------|----------------|-------------|-----------------|----------------|-----------------------|
| 37              | 1150           | F           | 37              | 1167           | LSC:IG                |
| 60              | 1449           | F           | 60              | 1459           | LSC:IG                |
| 50              | 1449           | F           | 50              | 1469           | LSC:IG                |
| 40              | 1449           | F           | 40              | 1479           | LSC:IG                |
| 30              | 1449           | F           | 30              | 1489           | LSC:IG                |

|    |       |   |    |        |                   |
|----|-------|---|----|--------|-------------------|
| 43 | 5500  | F | 43 | 5574   | LSC:IG            |
| 30 | 6195  | P | 30 | 42834  | LSC:IG            |
| 39 | 7449  | F | 39 | 108694 | LSC:IG            |
| 42 | 7449  | P | 42 | 94299  | LSC:IG            |
| 81 | 10382 | F | 81 | 12606  | <i>psaA</i> gene  |
| 67 | 10396 | F | 67 | 12620  | <i>psaA</i> gene  |
| 39 | 10424 | F | 39 | 12648  | <i>psaA</i> gene  |
| 32 | 10438 | F | 32 | 12662  | <i>psaA</i> gene  |
| 30 | 14826 | F | 30 | 41203  | LSC:IG            |
| 30 | 21333 | R | 30 | 21341  | LSC:IG            |
| 31 | 34922 | P | 31 | 34922  | LSC:IG            |
| 38 | 41515 | F | 38 | 41534  | <i>trnS</i> gene  |
| 41 | 42290 | P | 41 | 42290  | LSC:IG            |
| 88 | 47551 | P | 88 | 59926  | LSC:IG            |
| 53 | 47908 | F | 53 | 47935  | LSC:IG            |
| 49 | 48227 | F | 49 | 48272  | <i>rps18</i> gene |
| 37 | 48236 | F | 37 | 48296  | <i>rps18</i> gene |
| 37 | 48236 | F | 37 | 48341  | <i>rps18</i> gene |
| 40 | 48236 | F | 40 | 48326  | <i>rps18</i> gene |
| 40 | 48236 | F | 40 | 48356  | <i>rps18</i> gene |
| 36 | 48236 | F | 36 | 48371  | <i>rps18</i> gene |
| 37 | 48236 | F | 37 | 48311  | <i>rps18</i> gene |
| 32 | 48244 | F | 32 | 48349  | <i>rps18</i> gene |
| 32 | 48244 | F | 32 | 48334  | <i>rps18</i> gene |
| 31 | 48244 | F | 31 | 48379  | <i>rps18</i> gene |
| 32 | 48247 | F | 32 | 48307  | <i>rps18</i> gene |
| 31 | 48247 | F | 31 | 48367  | <i>rps18</i> gene |
| 67 | 48281 | F | 67 | 48296  | <i>rps18</i> gene |
| 67 | 48281 | F | 67 | 48326  | <i>rps18</i> gene |
| 52 | 48281 | F | 52 | 48341  | <i>rps18</i> gene |
| 42 | 48281 | F | 42 | 48356  | <i>rps18</i> gene |
| 36 | 48281 | F | 36 | 48371  | <i>rps18</i> gene |
| 37 | 48281 | F | 37 | 48311  | <i>rps18</i> gene |
| 59 | 48289 | F | 59 | 48334  | <i>rps18</i> gene |
| 44 | 48289 | F | 44 | 48349  | <i>rps18</i> gene |
| 31 | 48289 | F | 31 | 48379  | <i>rps18</i> gene |
| 56 | 48292 | F | 56 | 48307  | <i>rps18</i> gene |
| 40 | 48292 | F | 40 | 48367  | <i>rps18</i> gene |
| 55 | 48307 | F | 55 | 48352  | <i>rps18</i> gene |
| 40 | 48307 | F | 40 | 48382  | <i>rps18</i> gene |
| 55 | 48322 | F | 55 | 48352  | <i>rps18</i> gene |
| 41 | 48322 | F | 41 | 48337  | <i>rps18</i> gene |
| 55 | 48337 | F | 55 | 48367  | <i>rps18</i> gene |
| 61 | 49078 | F | 61 | 57129  | LSC:IG            |

|     |       |   |     |        |             |
|-----|-------|---|-----|--------|-------------|
| 51  | 49088 | F | 51  | 57139  | LSC:IG      |
| 38  | 49101 | F | 38  | 57152  | LSC:IG      |
| 31  | 56850 | P | 31  | 56850  | LSC:IG      |
| 35  | 57492 | P | 35  | 57503  | LSC:IG:ACCD |
| 31  | 58290 | F | 31  | 58374  | LSC:IG:ACCD |
| 43  | 58296 | F | 43  | 58362  | LSC:IG:ACCD |
| 50  | 58296 | F | 50  | 58314  | LSC:IG:ACCD |
| 32  | 58296 | F | 32  | 58332  | LSC:IG:ACCD |
| 49  | 58299 | F | 49  | 58347  | LSC:IG:ACCD |
| 45  | 58307 | F | 45  | 58337  | LSC:IG:ACCD |
| 47  | 58317 | F | 47  | 58347  | LSC:IG:ACCD |
| 50  | 58337 | F | 50  | 58355  | LSC:IG:ACCD |
| 32  | 58337 | F | 32  | 58373  | LSC:IG:ACCD |
| 40  | 58347 | F | 40  | 58365  | LSC:IG:ACCD |
| 57  | 59409 | F | 57  | 59532  | LSC:IG:ACCD |
| 35  | 59413 | F | 35  | 59605  | LSC:IG:ACCD |
| 80  | 59422 | F | 80  | 59440  | LSC:IG:ACCD |
| 62  | 59422 | F | 62  | 59458  | LSC:IG:ACCD |
| 44  | 59422 | F | 44  | 59476  | LSC:IG:ACCD |
| 30  | 59422 | F | 30  | 59494  | LSC:IG:ACCD |
| 44  | 59440 | F | 44  | 59545  | LSC:IG:ACCD |
| 44  | 59458 | F | 44  | 59545  | LSC:IG:ACCD |
| 82  | 59476 | F | 82  | 59545  | LSC:IG:ACCD |
| 30  | 59494 | F | 30  | 59545  | LSC:IG:ACCD |
| 46  | 59512 | F | 46  | 59581  | LSC:IG:ACCD |
| 35  | 59536 | F | 35  | 59605  | LSC:IG:ACCD |
| 42  | 59834 | F | 42  | 59864  | LSC:IG:ACCD |
| 37  | 60354 | P | 37  | 60354  | LSC:IG:ACCD |
| 33  | 62198 | F | 33  | 62470  | LSC:IG      |
| 186 | 62224 | F | 186 | 102997 | LSC:IG      |
| 122 | 62288 | F | 122 | 103061 | LSC:IG      |
| 51  | 73757 | P | 51  | 73757  | LSC:IG      |
| 40  | 74943 | F | 40  | 98706  | LSC:IG      |
| 265 | 74948 | P | 265 | 83070  | LSC:IG      |
| 211 | 74948 | F | 211 | 98471  | LSC:IG      |
| 40  | 74956 | F | 40  | 98719  | LSC:IG      |
| 484 | 74999 | F | 484 | 75053  | LSC:IG      |
| 430 | 74999 | F | 430 | 75107  | LSC:IG      |
| 376 | 74999 | F | 376 | 75161  | LSC:IG      |
| 322 | 74999 | F | 322 | 75215  | LSC:IG      |
| 268 | 74999 | F | 268 | 75269  | LSC:IG      |
| 214 | 74999 | F | 214 | 75323  | LSC:IG      |
| 160 | 74999 | F | 160 | 75377  | LSC:IG      |
| 160 | 74999 | P | 160 | 83070  | LSC:IG      |

|     |       |   |     |       |        |
|-----|-------|---|-----|-------|--------|
| 106 | 74999 | F | 106 | 98576 | LSC:IG |
| 106 | 74999 | F | 106 | 75431 | LSC:IG |
| 106 | 74999 | P | 106 | 83070 | LSC:IG |
| 52  | 74999 | F | 52  | 75485 | LSC:IG |
| 52  | 74999 | P | 52  | 83070 | LSC:IG |
| 52  | 74999 | F | 52  | 98630 | LSC:IG |
| 448 | 75035 | F | 448 | 75089 | LSC:IG |
| 394 | 75035 | F | 394 | 75143 | LSC:IG |
| 340 | 75035 | F | 340 | 75197 | LSC:IG |
| 286 | 75035 | F | 286 | 75251 | LSC:IG |
| 232 | 75035 | F | 232 | 75305 | LSC:IG |
| 178 | 75035 | F | 178 | 75359 | LSC:IG |
| 124 | 75035 | F | 124 | 75413 | LSC:IG |
| 124 | 75035 | P | 124 | 83070 | LSC:IG |
| 70  | 75035 | F | 70  | 98612 | LSC:IG |
| 70  | 75035 | F | 70  | 75467 | LSC:IG |
| 70  | 75035 | P | 70  | 83070 | LSC:IG |
| 214 | 75053 | P | 214 | 83070 | LSC:IG |
| 160 | 75053 | F | 160 | 98522 | LSC:IG |
| 178 | 75089 | P | 178 | 83070 | LSC:IG |
| 124 | 75089 | F | 124 | 98558 | LSC:IG |
| 214 | 75107 | P | 214 | 83070 | LSC:IG |
| 160 | 75107 | F | 160 | 98522 | LSC:IG |
| 178 | 75143 | P | 178 | 83070 | LSC:IG |
| 124 | 75143 | F | 124 | 98558 | LSC:IG |
| 214 | 75161 | P | 214 | 83070 | LSC:IG |
| 160 | 75161 | F | 160 | 98522 | LSC:IG |
| 178 | 75197 | P | 178 | 83070 | LSC:IG |
| 124 | 75197 | F | 124 | 98558 | LSC:IG |
| 214 | 75215 | P | 214 | 83070 | LSC:IG |
| 160 | 75215 | F | 160 | 98522 | LSC:IG |
| 178 | 75251 | P | 178 | 83070 | LSC:IG |
| 124 | 75251 | F | 124 | 98558 | LSC:IG |
| 214 | 75269 | P | 214 | 83070 | LSC:IG |
| 160 | 75269 | F | 160 | 98522 | LSC:IG |
| 178 | 75305 | P | 178 | 83070 | LSC:IG |
| 124 | 75305 | F | 124 | 98558 | LSC:IG |
| 497 | 75323 | P | 497 | 82787 | LSC:IG |
| 160 | 75323 | F | 160 | 98522 | LSC:IG |
| 461 | 75359 | P | 461 | 82787 | LSC:IG |
| 124 | 75359 | F | 124 | 98558 | LSC:IG |
| 185 | 75377 | F | 185 | 98522 | LSC:IG |
| 160 | 75377 | P | 160 | 83124 | LSC:IG |
| 149 | 75413 | F | 149 | 98558 | LSC:IG |

|     |       |   |     |        |                  |
|-----|-------|---|-----|--------|------------------|
| 124 | 75413 | P | 124 | 83124  | LSC:IG           |
| 106 | 75431 | P | 106 | 83178  | LSC:IG           |
| 106 | 75431 | F | 106 | 98522  | LSC:IG           |
| 70  | 75467 | P | 70  | 83178  | LSC:IG           |
| 70  | 75467 | F | 70  | 98558  | LSC:IG           |
| 52  | 75485 | P | 52  | 83232  | LSC:IG           |
| 52  | 75485 | F | 52  | 98522  | LSC:IG           |
| 41  | 75521 | F | 41  | 98666  | LSC:IG           |
| 31  | 77218 | F | 31  | 77245  | LSC:IG           |
| 44  | 80453 | F | 44  | 80475  | LSC:IG           |
| 31  | 82394 | F | 31  | 82409  | LSC:IG           |
| 185 | 83045 | P | 185 | 98522  | LSC:IG           |
| 160 | 83070 | F | 160 | 83124  | LSC:IG           |
| 106 | 83070 | F | 106 | 83178  | LSC:IG           |
| 106 | 83070 | P | 106 | 98522  | LSC:IG           |
| 52  | 83070 | F | 52  | 83232  | LSC:IG           |
| 52  | 83070 | P | 52  | 98522  | LSC:IG           |
| 143 | 83087 | F | 143 | 83141  | LSC:IG           |
| 143 | 83087 | P | 143 | 98522  | LSC:IG           |
| 89  | 83087 | F | 89  | 83195  | LSC:IG           |
| 89  | 83087 | P | 89  | 98522  | LSC:IG           |
| 791 | 83124 | P | 791 | 97891  | LSC:IG           |
| 35  | 83141 | F | 35  | 83249  | LSC:IG           |
| 35  | 83141 | P | 35  | 98522  | LSC:IG           |
| 106 | 83178 | P | 106 | 98576  | LSC:IG           |
| 35  | 83195 | F | 35  | 83249  | LSC:IG           |
| 35  | 83195 | P | 35  | 98522  | LSC:IG           |
| 52  | 83232 | P | 52  | 98630  | LSC:IG           |
| 35  | 83249 | P | 35  | 98576  | LSC:IG           |
| 35  | 83249 | P | 35  | 98630  | LSC:IG           |
| 40  | 83287 | P | 40  | 98719  | LSC:IG           |
| 35  | 83300 | P | 35  | 98711  | LSC:IG           |
| 62  | 83919 | P | 62  | 97825  | LSC:IG           |
| 50  | 83941 | P | 50  | 97815  | LSC:IG           |
| 46  | 84113 | P | 46  | 97647  | LSC:IG           |
| 30  | 84129 | P | 30  | 97647  | LSC:IG           |
| 37  | 87405 | P | 37  | 87405  | LSC:IG           |
| 40  | 94302 | P | 40  | 108693 | <i>ndhA</i> gene |
| 30  | 94314 | P | 30  | 108691 | <i>ndhA</i> gene |
| 52  | 94690 | P | 52  | 94690  | <i>ndhA</i> gene |
| 35  | 98471 | F | 35  | 98711  | LSC:IG           |
| 40  | 98479 | F | 40  | 98719  | LSC:IG           |
| 106 | 98522 | F | 106 | 98576  | LSC:IG           |
| 52  | 98522 | F | 52  | 98630  | LSC:IG           |



|    |        |   |    |        |                   |
|----|--------|---|----|--------|-------------------|
| 70 | 98558  | F | 70 | 98612  | LSC:IG            |
| 55 | 101174 | F | 55 | 101263 | <i>rrn23</i> gene |
| 42 | 101174 | F | 42 | 101388 | <i>rrn23</i> gene |
| 33 | 101174 | F | 33 | 101310 | <i>rrn23</i> gene |
| 33 | 101174 | F | 33 | 101336 | <i>rrn23</i> gene |
| 33 | 101174 | F | 33 | 101362 | <i>rrn23</i> gene |
| 45 | 101184 | F | 45 | 101273 | <i>rrn23</i> gene |
| 32 | 101184 | F | 32 | 101398 | <i>rrn23</i> gene |
| 63 | 101186 | F | 63 | 101207 | <i>rrn23</i> gene |
| 42 | 101187 | F | 42 | 101229 | <i>rrn23</i> gene |
| 42 | 101207 | F | 42 | 101275 | <i>rrn23</i> gene |
| 30 | 101207 | F | 30 | 101400 | <i>rrn23</i> gene |
| 41 | 101208 | F | 41 | 101229 | <i>rrn23</i> gene |
| 30 | 101228 | F | 30 | 101400 | <i>rrn23</i> gene |
| 67 | 101229 | F | 67 | 101276 | <i>rrn23</i> gene |
| 52 | 101249 | F | 52 | 101374 | <i>rrn23</i> gene |
| 47 | 101249 | F | 47 | 101348 | <i>rrn23</i> gene |
| 47 | 101249 | F | 47 | 101322 | <i>rrn23</i> gene |
| 41 | 101255 | F | 41 | 101302 | <i>rrn23</i> gene |
| 99 | 101296 | F | 99 | 101322 | <i>rrn23</i> gene |
| 73 | 101296 | F | 73 | 101348 | <i>rrn23</i> gene |
| 47 | 101296 | F | 47 | 101374 | <i>rrn23</i> gene |
| 49 | 101320 | F | 49 | 101372 | <i>rrn23</i> gene |
| 49 | 101346 | F | 49 | 101372 | <i>rrn23</i> gene |
| 35 | 107838 | F | 35 | 107863 | LSC:IG            |
| 51 | 112308 | P | 51 | 112308 | LSC:IG            |

*Passiflora costaricensis*

| Repeat Length 1 | Start Repeat 1 | Orientation | Repeat Length 2 | Start Repeat 2 | Location in cp genome |
|-----------------|----------------|-------------|-----------------|----------------|-----------------------|
| 43              | 5547           | F           | 43              | 5621           | LSC:IG                |
| 30              | 6242           | P           | 30              | 42866          | LSC:IG                |
| 39              | 7476           | F           | 39              | 109940         | <i>ycf3</i> gene      |
| 42              | 7476           | P           | 42              | 95876          | <i>ycf3</i> gene      |
| 47              | 8688           | F           | 47              | 8711           | LSC:IG                |
| 33              | 8688           | F           | 33              | 8734           | LSC:IG                |
| 81              | 10443          | F           | 81              | 12667          | <i>psaA</i> gene      |
| 67              | 10457          | F           | 67              | 12681          | <i>psaA</i> gene      |
| 39              | 10485          | F           | 39              | 12709          | <i>psaA</i> gene      |
| 32              | 10499          | F           | 32              | 12723          | <i>psaA</i> gene      |
| 30              | 14885          | F           | 30              | 41237          | LSC:IG                |
| 30              | 21373          | R           | 30              | 21381          | LSC:IG                |
| 38              | 41549          | F           | 38              | 41568          | <i>trnS</i> gene      |
| 41              | 42322          | P           | 41              | 42322          | LSC:IG                |

|     |       |   |     |       |             |
|-----|-------|---|-----|-------|-------------|
| 54  | 45674 | F | 54  | 45685 | LSC:IG      |
| 43  | 45674 | F | 43  | 45696 | LSC:IG      |
| 32  | 45674 | F | 32  | 45707 | LSC:IG      |
| 88  | 47740 | P | 88  | 61220 | LSC:IG      |
| 80  | 48097 | F | 80  | 48124 | LSC:IG      |
| 53  | 48097 | F | 53  | 48151 | LSC:IG      |
| 81  | 48452 | F | 81  | 48482 | LSC:IG      |
| 78  | 48452 | F | 78  | 48467 | LSC:IG      |
| 66  | 48452 | F | 66  | 48497 | LSC:IG      |
| 51  | 48452 | F | 51  | 48512 | LSC:IG      |
| 36  | 48452 | F | 36  | 48527 | LSC:IG      |
| 74  | 48463 | F | 74  | 48478 | LSC:IG      |
| 67  | 48478 | F | 67  | 48493 | LSC:IG      |
| 55  | 48478 | F | 55  | 48508 | LSC:IG      |
| 40  | 48478 | F | 40  | 48523 | LSC:IG      |
| 32  | 48486 | F | 32  | 48546 | LSC:IG      |
| 32  | 48501 | F | 32  | 48546 | LSC:IG      |
| 61  | 49240 | F | 61  | 57290 | LSC:IG      |
| 51  | 49250 | F | 51  | 57300 | LSC:IG      |
| 38  | 49263 | F | 38  | 57313 | LSC:IG      |
| 35  | 57653 | P | 35  | 57664 | LSC:IG:ACCD |
| 31  | 58450 | F | 31  | 58887 | LSC:IG:ACCD |
| 36  | 58456 | F | 36  | 58605 | LSC:IG:ACCD |
| 32  | 58456 | F | 32  | 58623 | LSC:IG:ACCD |
| 32  | 58456 | F | 32  | 58785 | LSC:IG:ACCD |
| 32  | 58456 | F | 32  | 58827 | LSC:IG:ACCD |
| 32  | 58456 | F | 32  | 58857 | LSC:IG:ACCD |
| 36  | 58456 | F | 36  | 58875 | LSC:IG:ACCD |
| 31  | 58461 | F | 31  | 58592 | LSC:IG:ACCD |
| 31  | 58461 | F | 31  | 58772 | LSC:IG:ACCD |
| 31  | 58461 | F | 31  | 58814 | LSC:IG:ACCD |
| 31  | 58461 | F | 31  | 58844 | LSC:IG:ACCD |
| 30  | 58468 | F | 30  | 58617 | LSC:IG:ACCD |
| 35  | 58518 | F | 35  | 58590 | LSC:IG:ACCD |
| 35  | 58518 | F | 35  | 58770 | LSC:IG:ACCD |
| 35  | 58518 | F | 35  | 58812 | LSC:IG:ACCD |
| 35  | 58518 | F | 35  | 58842 | LSC:IG:ACCD |
| 115 | 58522 | F | 115 | 58702 | LSC:IG:ACCD |
| 97  | 58522 | F | 97  | 58642 | LSC:IG:ACCD |
| 97  | 58522 | F | 97  | 58654 | LSC:IG:ACCD |
| 97  | 58522 | F | 97  | 58666 | LSC:IG:ACCD |
| 97  | 58522 | F | 97  | 58678 | LSC:IG:ACCD |
| 97  | 58522 | F | 97  | 58690 | LSC:IG:ACCD |
| 85  | 58522 | F | 85  | 58534 | LSC:IG:ACCD |

|     |       |   |     |       |             |
|-----|-------|---|-----|-------|-------------|
| 85  | 58522 | F | 85  | 58714 | LSC:IG:ACCD |
| 73  | 58522 | F | 73  | 58546 | LSC:IG:ACCD |
| 73  | 58522 | F | 73  | 58726 | LSC:IG:ACCD |
| 61  | 58522 | F | 61  | 58558 | LSC:IG:ACCD |
| 61  | 58522 | F | 61  | 58738 | LSC:IG:ACCD |
| 49  | 58522 | F | 49  | 58570 | LSC:IG:ACCD |
| 49  | 58522 | F | 49  | 58750 | LSC:IG:ACCD |
| 37  | 58522 | F | 37  | 58582 | LSC:IG:ACCD |
| 37  | 58522 | F | 37  | 58762 | LSC:IG:ACCD |
| 37  | 58522 | F | 37  | 58804 | LSC:IG:ACCD |
| 93  | 58526 | F | 93  | 58634 | LSC:IG:ACCD |
| 45  | 58526 | F | 45  | 58796 | LSC:IG:ACCD |
| 33  | 58526 | F | 33  | 58838 | LSC:IG:ACCD |
| 33  | 58526 | F | 33  | 58868 | LSC:IG:ACCD |
| 81  | 58538 | F | 81  | 58634 | LSC:IG:ACCD |
| 45  | 58538 | F | 45  | 58796 | LSC:IG:ACCD |
| 33  | 58538 | F | 33  | 58838 | LSC:IG:ACCD |
| 33  | 58538 | F | 33  | 58868 | LSC:IG:ACCD |
| 69  | 58550 | F | 69  | 58634 | LSC:IG:ACCD |
| 45  | 58550 | F | 45  | 58796 | LSC:IG:ACCD |
| 33  | 58550 | F | 33  | 58838 | LSC:IG:ACCD |
| 33  | 58550 | F | 33  | 58868 | LSC:IG:ACCD |
| 57  | 58562 | F | 57  | 58634 | LSC:IG:ACCD |
| 45  | 58562 | F | 45  | 58796 | LSC:IG:ACCD |
| 33  | 58562 | F | 33  | 58838 | LSC:IG:ACCD |
| 33  | 58562 | F | 33  | 58868 | LSC:IG:ACCD |
| 63  | 58574 | F | 63  | 58796 | LSC:IG:ACCD |
| 45  | 58574 | F | 45  | 58634 | LSC:IG:ACCD |
| 33  | 58574 | F | 33  | 58838 | LSC:IG:ACCD |
| 33  | 58574 | F | 33  | 58868 | LSC:IG:ACCD |
| 69  | 58586 | F | 69  | 58838 | LSC:IG:ACCD |
| 33  | 58586 | F | 33  | 58634 | LSC:IG:ACCD |
| 33  | 58586 | F | 33  | 58796 | LSC:IG:ACCD |
| 39  | 58586 | F | 39  | 58868 | LSC:IG:ACCD |
| 50  | 58598 | F | 50  | 58868 | LSC:IG:ACCD |
| 39  | 58598 | F | 39  | 58616 | LSC:IG:ACCD |
| 32  | 58598 | F | 32  | 58886 | LSC:IG:ACCD |
| 63  | 58616 | F | 63  | 58778 | LSC:IG:ACCD |
| 51  | 58616 | F | 51  | 58820 | LSC:IG:ACCD |
| 45  | 58616 | F | 45  | 58850 | LSC:IG:ACCD |
| 30  | 58620 | F | 30  | 58890 | LSC:IG:ACCD |
| 153 | 58634 | F | 153 | 58646 | LSC:IG:ACCD |
| 141 | 58634 | F | 141 | 58658 | LSC:IG:ACCD |
| 129 | 58634 | F | 129 | 58670 | LSC:IG:ACCD |

|     |       |   |     |       |             |
|-----|-------|---|-----|-------|-------------|
| 117 | 58634 | F | 117 | 58682 | LSC:IG:ACCD |
| 105 | 58634 | F | 105 | 58694 | LSC:IG:ACCD |
| 93  | 58634 | F | 93  | 58706 | LSC:IG:ACCD |
| 81  | 58634 | F | 81  | 58718 | LSC:IG:ACCD |
| 69  | 58634 | F | 69  | 58730 | LSC:IG:ACCD |
| 57  | 58634 | F | 57  | 58742 | LSC:IG:ACCD |
| 45  | 58634 | F | 45  | 58754 | LSC:IG:ACCD |
| 33  | 58634 | F | 33  | 58766 | LSC:IG:ACCD |
| 33  | 58634 | F | 33  | 58808 | LSC:IG:ACCD |
| 45  | 58646 | F | 45  | 58796 | LSC:IG:ACCD |
| 33  | 58646 | F | 33  | 58838 | LSC:IG:ACCD |
| 33  | 58646 | F | 33  | 58868 | LSC:IG:ACCD |
| 45  | 58658 | F | 45  | 58796 | LSC:IG:ACCD |
| 33  | 58658 | F | 33  | 58838 | LSC:IG:ACCD |
| 33  | 58658 | F | 33  | 58868 | LSC:IG:ACCD |
| 45  | 58670 | F | 45  | 58796 | LSC:IG:ACCD |
| 33  | 58670 | F | 33  | 58838 | LSC:IG:ACCD |
| 33  | 58670 | F | 33  | 58868 | LSC:IG:ACCD |
| 45  | 58682 | F | 45  | 58796 | LSC:IG:ACCD |
| 33  | 58682 | F | 33  | 58838 | LSC:IG:ACCD |
| 33  | 58682 | F | 33  | 58868 | LSC:IG:ACCD |
| 45  | 58694 | F | 45  | 58796 | LSC:IG:ACCD |
| 33  | 58694 | F | 33  | 58838 | LSC:IG:ACCD |
| 33  | 58694 | F | 33  | 58868 | LSC:IG:ACCD |
| 45  | 58706 | F | 45  | 58796 | LSC:IG:ACCD |
| 33  | 58706 | F | 33  | 58838 | LSC:IG:ACCD |
| 33  | 58706 | F | 33  | 58868 | LSC:IG:ACCD |
| 45  | 58718 | F | 45  | 58796 | LSC:IG:ACCD |
| 33  | 58718 | F | 33  | 58838 | LSC:IG:ACCD |
| 33  | 58718 | F | 33  | 58868 | LSC:IG:ACCD |
| 45  | 58730 | F | 45  | 58796 | LSC:IG:ACCD |
| 33  | 58730 | F | 33  | 58838 | LSC:IG:ACCD |
| 33  | 58730 | F | 33  | 58868 | LSC:IG:ACCD |
| 45  | 58742 | F | 45  | 58796 | LSC:IG:ACCD |
| 33  | 58742 | F | 33  | 58838 | LSC:IG:ACCD |
| 33  | 58742 | F | 33  | 58868 | LSC:IG:ACCD |
| 75  | 58754 | F | 75  | 58796 | LSC:IG:ACCD |
| 33  | 58754 | F | 33  | 58838 | LSC:IG:ACCD |
| 33  | 58754 | F | 33  | 58868 | LSC:IG:ACCD |
| 57  | 58766 | F | 57  | 58838 | LSC:IG:ACCD |
| 33  | 58766 | F | 33  | 58796 | LSC:IG:ACCD |
| 39  | 58766 | F | 39  | 58868 | LSC:IG:ACCD |
| 39  | 58778 | F | 39  | 58868 | LSC:IG:ACCD |
| 32  | 58778 | F | 32  | 58886 | LSC:IG:ACCD |

|     |       |   |     |        |             |
|-----|-------|---|-----|--------|-------------|
| 33  | 58796 | F | 33  | 58808  | LSC:IG:ACCD |
| 69  | 58808 | F | 69  | 58838  | LSC:IG:ACCD |
| 39  | 58808 | F | 39  | 58868  | LSC:IG:ACCD |
| 39  | 58820 | F | 39  | 58868  | LSC:IG:ACCD |
| 32  | 58820 | F | 32  | 58886  | LSC:IG:ACCD |
| 39  | 58850 | F | 39  | 58868  | LSC:IG:ACCD |
| 32  | 58850 | F | 32  | 58886  | LSC:IG:ACCD |
| 41  | 59440 | F | 41  | 59461  | LSC:IG:ACCD |
| 33  | 59588 | F | 33  | 59663  | LSC:IG:ACCD |
| 60  | 59590 | F | 60  | 59812  | LSC:IG:ACCD |
| 96  | 59600 | F | 96  | 59747  | LSC:IG:ACCD |
| 34  | 59640 | F | 34  | 59713  | LSC:IG:ACCD |
| 39  | 59657 | F | 39  | 59804  | LSC:IG:ACCD |
| 31  | 59665 | F | 31  | 59812  | LSC:IG:ACCD |
| 34  | 59713 | F | 34  | 59787  | LSC:IG:ACCD |
| 50  | 59747 | F | 50  | 59822  | LSC:IG:ACCD |
| 76  | 59922 | F | 76  | 60123  | LSC:IG:ACCD |
| 86  | 59930 | F | 86  | 60131  | LSC:IG:ACCD |
| 71  | 59949 | F | 71  | 60150  | LSC:IG:ACCD |
| 57  | 59975 | F | 57  | 60176  | LSC:IG:ACCD |
| 33  | 59999 | F | 33  | 60200  | LSC:IG:ACCD |
| 31  | 60048 | F | 31  | 60240  | LSC:IG:ACCD |
| 35  | 60328 | F | 35  | 60364  | LSC:IG:ACCD |
| 105 | 60601 | F | 105 | 60670  | LSC:IG:ACCD |
| 57  | 60601 | F | 57  | 60853  | LSC:IG:ACCD |
| 32  | 60601 | F | 32  | 60739  | LSC:IG:ACCD |
| 32  | 60601 | F | 32  | 60796  | LSC:IG:ACCD |
| 72  | 60634 | F | 72  | 60703  | LSC:IG:ACCD |
| 84  | 60643 | F | 84  | 60826  | LSC:IG:ACCD |
| 63  | 60643 | F | 63  | 60769  | LSC:IG:ACCD |
| 39  | 60667 | F | 39  | 60793  | LSC:IG:ACCD |
| 32  | 60667 | F | 32  | 60922  | LSC:IG:ACCD |
| 120 | 60712 | F | 120 | 60769  | LSC:IG:ACCD |
| 63  | 60712 | F | 63  | 60826  | LSC:IG:ACCD |
| 96  | 60736 | F | 96  | 60793  | LSC:IG:ACCD |
| 32  | 60736 | F | 32  | 60922  | LSC:IG:ACCD |
| 31  | 60791 | F | 31  | 60920  | LSC:IG:ACCD |
| 39  | 60793 | F | 39  | 60850  | LSC:IG:ACCD |
| 32  | 60850 | F | 32  | 60922  | LSC:IG:ACCD |
| 53  | 63416 | F | 53  | 63433  | LSC:IG      |
| 36  | 63416 | F | 36  | 63450  | LSC:IG      |
| 33  | 63542 | F | 33  | 63809  | LSC:IG      |
| 181 | 63568 | F | 181 | 104220 | LSC:IG      |
| 35  | 64826 | R | 35  | 68360  | LSC:IG      |

|     |       |   |     |        |                  |
|-----|-------|---|-----|--------|------------------|
| 31  | 68352 | F | 31  | 68376  | LSC:IG           |
| 34  | 68594 | F | 34  | 68606  | <i>clpP</i> gene |
| 51  | 75130 | P | 51  | 75130  | LSC:IG           |
| 81  | 76288 | F | 81  | 76358  | LSC:IG           |
| 64  | 76451 | P | 64  | 84736  | LSC:IG           |
| 64  | 76451 | F | 64  | 100206 | LSC:IG           |
| 91  | 76461 | P | 91  | 84699  | LSC:IG           |
| 91  | 76461 | F | 91  | 100216 | LSC:IG           |
| 107 | 76475 | P | 107 | 84669  | LSC:IG           |
| 83  | 76475 | F | 83  | 100230 | LSC:IG           |
| 650 | 76499 | F | 650 | 76580  | LSC:IG           |
| 569 | 76499 | F | 569 | 76661  | LSC:IG           |
| 488 | 76499 | F | 488 | 76742  | LSC:IG           |
| 407 | 76499 | F | 407 | 76823  | LSC:IG           |
| 326 | 76499 | F | 326 | 76904  | LSC:IG           |
| 245 | 76499 | F | 245 | 76985  | LSC:IG           |
| 164 | 76499 | F | 164 | 77066  | LSC:IG           |
| 83  | 76499 | F | 83  | 77147  | LSC:IG           |
| 78  | 76504 | P | 78  | 84669  | LSC:IG           |
| 54  | 76504 | F | 54  | 100259 | LSC:IG           |
| 390 | 76516 | F | 390 | 76840  | LSC:IG           |
| 228 | 76516 | F | 228 | 77002  | LSC:IG           |
| 147 | 76516 | F | 147 | 77083  | LSC:IG           |
| 66  | 76516 | F | 66  | 77164  | LSC:IG           |
| 66  | 76516 | P | 66  | 84669  | LSC:IG           |
| 42  | 76516 | F | 42  | 100271 | LSC:IG           |
| 30  | 76553 | P | 30  | 84668  | LSC:IG           |
| 83  | 76580 | P | 83  | 84669  | LSC:IG           |
| 59  | 76580 | F | 59  | 100254 | LSC:IG           |
| 390 | 76597 | F | 390 | 76840  | LSC:IG           |
| 228 | 76597 | F | 228 | 77002  | LSC:IG           |
| 147 | 76597 | F | 147 | 77083  | LSC:IG           |
| 66  | 76597 | F | 66  | 77164  | LSC:IG           |
| 66  | 76597 | P | 66  | 84669  | LSC:IG           |
| 42  | 76597 | F | 42  | 100271 | LSC:IG           |
| 30  | 76634 | P | 30  | 84668  | LSC:IG           |
| 83  | 76661 | P | 83  | 84669  | LSC:IG           |
| 59  | 76661 | F | 59  | 100254 | LSC:IG           |
| 390 | 76678 | F | 390 | 76840  | LSC:IG           |
| 228 | 76678 | F | 228 | 77002  | LSC:IG           |
| 147 | 76678 | F | 147 | 77083  | LSC:IG           |
| 66  | 76678 | F | 66  | 77164  | LSC:IG           |
| 66  | 76678 | P | 66  | 84669  | LSC:IG           |
| 42  | 76678 | F | 42  | 100271 | LSC:IG           |

|      |        |   |      |        |                   |
|------|--------|---|------|--------|-------------------|
| 30   | 76715  | P | 30   | 84668  | LSC:IG            |
| 83   | 76742  | P | 83   | 84669  | LSC:IG            |
| 59   | 76742  | F | 59   | 100254 | LSC:IG            |
| 390  | 76759  | F | 390  | 76840  | LSC:IG            |
| 228  | 76759  | F | 228  | 77002  | LSC:IG            |
| 147  | 76759  | F | 147  | 77083  | LSC:IG            |
| 66   | 76759  | F | 66   | 77164  | LSC:IG            |
| 66   | 76759  | P | 66   | 84669  | LSC:IG            |
| 42   | 76759  | F | 42   | 100271 | LSC:IG            |
| 30   | 76796  | P | 30   | 84668  | LSC:IG            |
| 83   | 76823  | P | 83   | 84669  | LSC:IG            |
| 59   | 76823  | F | 59   | 100254 | LSC:IG            |
| 309  | 76840  | F | 309  | 76921  | LSC:IG            |
| 30   | 76877  | P | 30   | 84668  | LSC:IG            |
| 83   | 76904  | P | 83   | 84669  | LSC:IG            |
| 59   | 76904  | F | 59   | 100254 | LSC:IG            |
| 228  | 76921  | F | 228  | 77002  | LSC:IG            |
| 147  | 76921  | F | 147  | 77083  | LSC:IG            |
| 66   | 76921  | F | 66   | 77164  | LSC:IG            |
| 66   | 76921  | P | 66   | 84669  | LSC:IG            |
| 42   | 76921  | F | 42   | 100271 | LSC:IG            |
| 30   | 76958  | P | 30   | 84668  | LSC:IG            |
| 83   | 76985  | P | 83   | 84669  | LSC:IG            |
| 59   | 76985  | F | 59   | 100254 | LSC:IG            |
| 30   | 77039  | P | 30   | 84668  | LSC:IG            |
| 83   | 77066  | P | 83   | 84669  | LSC:IG            |
| 59   | 77066  | F | 59   | 100254 | LSC:IG            |
| 30   | 77120  | P | 30   | 84668  | LSC:IG            |
| 353  | 77147  | P | 353  | 84399  | LSC:IG            |
| 59   | 77147  | F | 59   | 100254 | LSC:IG            |
| 299  | 77201  | P | 299  | 84399  | LSC:IG            |
| 31   | 77842  | F | 31   | 77857  | LSC:IG            |
| 1070 | 84693  | P | 1070 | 99243  | LSC:IG            |
| 31   | 84785  | F | 31   | 84834  | LSC:IG            |
| 31   | 84785  | P | 31   | 100141 | LSC:IG            |
| 31   | 84834  | P | 31   | 100190 | LSC:IG            |
| 40   | 95879  | P | 40   | 109939 | <i>ndhA</i> gene  |
| 30   | 95891  | P | 30   | 109937 | <i>ndhA</i> gene  |
| 31   | 100141 | F | 31   | 100190 | LSC:IG            |
| 93   | 102541 | F | 93   | 102562 | <i>rrn23</i> gene |
| 72   | 102541 | F | 72   | 102583 | <i>rrn23</i> gene |
| 51   | 102541 | F | 51   | 102604 | <i>rrn23</i> gene |
| 30   | 102541 | F | 30   | 102625 | <i>rrn23</i> gene |
| 50   | 109041 | F | 50   | 109066 | LSC:IG            |

|    |        |   |    |        |        |
|----|--------|---|----|--------|--------|
| 35 | 109041 | F | 35 | 109091 | LSC:IG |
| 51 | 113553 | P | 51 | 113553 | LSC:IG |

*Passiflora suberosa*

| Repeat Length 1 | Start Repeat 1 | Orientation | Repeat Length 2 | Start Repeat 2 | Location in cp genome |
|-----------------|----------------|-------------|-----------------|----------------|-----------------------|
| 39              | 1423           | F           | 39              | 1465           | LSC:IG                |
| 33              | 5621           | F           | 33              | 5731           | <i>trnQ</i> gene      |
| 36              | 6031           | F           | 36              | 6105           | LSC:IG                |
| 30              | 6721           | F           | 30              | 49079          | LSC:IG                |
| 39              | 8044           | P           | 39              | 89679          | LSC:IG                |
| 39              | 8044           | F           | 39              | 125840         | LSC:IG                |
| 42              | 8044           | P           | 42              | 111439         | LSC:IG                |
| 79              | 10984          | F           | 79              | 13208          | <i>psaA</i> gene      |
| 65              | 10998          | F           | 65              | 13222          | <i>psaA</i> gene      |
| 37              | 11026          | F           | 37              | 13250          | <i>psaA</i> gene      |
| 30              | 15445          | P           | 30              | 50756          | LSC:IG                |
| 33              | 42026          | F           | 33              | 42052          | LSC:IG                |
| 38              | 42513          | P           | 38              | 57878          | LSC:IG                |
| 38              | 42513          | F           | 38              | 157642         | LSC:IG                |
| 38              | 42549          | P           | 38              | 57833          | LSC:IG                |
| 38              | 42549          | F           | 38              | 157687         | LSC:IG                |
| 32              | 43237          | F           | 32              | 43318          | <i>rps18</i> gene     |
| 73              | 43661          | F           | 73              | 43685          | <i>rps18</i> gene     |
| 44              | 43661          | F           | 44              | 43709          | <i>rps18</i> gene     |
| 31              | 43661          | F           | 31              | 43733          | <i>rps18</i> gene     |
| 67              | 43671          | F           | 67              | 43695          | <i>rps18</i> gene     |
| 39              | 43671          | F           | 39              | 43719          | <i>rps18</i> gene     |
| 32              | 43682          | F           | 32              | 43730          | <i>rps18</i> gene     |
| 32              | 43706          | F           | 32              | 43730          | <i>rps18</i> gene     |
| 33              | 45914          | F           | 33              | 45960          | LSC:IG                |
| 33              | 47855          | R           | 33              | 47855          | LSC:IG                |
| 33              | 47903          | F           | 33              | 47925          | LSC:IG                |
| 41              | 49616          | P           | 41              | 49616          | LSC:IG                |
| 48              | 50871          | P           | 48              | 50871          | LSC:IG                |
| 31              | 51289          | P           | 31              | 51289          | LSC:IG                |
| 43626           | 57245          | P           | 43626           | 114687         | IR                    |
| 30              | 58659          | C           | 30              | 156874         | <i>accD</i> gene      |
| 63              | 58987          | F           | 63              | 59104          | IR:IG:ACCD            |
| 63              | 58987          | P           | 63              | 156391         | IR:IG:ACCD            |
| 37              | 58987          | F           | 37              | 59038          | IR:IG:ACCD            |
| 37              | 58987          | P           | 37              | 156483         | IR:IG:ACCD            |
| 67              | 59008          | F           | 67              | 59074          | IR:IG:ACCD            |
| 67              | 59008          | P           | 67              | 156417         | IR:IG:ACCD            |



|    |       |   |    |        |            |
|----|-------|---|----|--------|------------|
| 31 | 59019 | F | 31 | 59136  | IR:IG:ACCD |
| 31 | 59019 | P | 31 | 156391 | IR:IG:ACCD |
| 37 | 59038 | P | 37 | 156534 | IR:IG:ACCD |
| 39 | 59059 | F | 39 | 59062  | IR:IG:ACCD |
| 39 | 59059 | P | 39 | 156457 | IR:IG:ACCD |
| 30 | 59059 | R | 30 | 59059  | IR:IG:ACCD |
| 30 | 59059 | C | 30 | 156469 | IR:IG:ACCD |
| 31 | 59059 | R | 31 | 59061  | IR:IG:ACCD |
| 31 | 59059 | C | 31 | 156466 | IR:IG:ACCD |
| 31 | 59059 | F | 31 | 59065  | IR:IG:ACCD |
| 31 | 59059 | P | 31 | 156462 | IR:IG:ACCD |
| 31 | 59059 | F | 31 | 59068  | IR:IG:ACCD |
| 31 | 59059 | P | 31 | 156459 | IR:IG:ACCD |
| 30 | 59059 | C | 30 | 156472 | IR:IG:ACCD |
| 34 | 59060 | R | 34 | 59060  | IR:IG:ACCD |
| 34 | 59060 | C | 34 | 156464 | IR:IG:ACCD |
| 39 | 59062 | P | 39 | 156460 | IR:IG:ACCD |
| 31 | 59063 | R | 31 | 59063  | IR:IG:ACCD |
| 31 | 59063 | C | 31 | 156464 | IR:IG:ACCD |
| 31 | 59065 | P | 31 | 156468 | IR:IG:ACCD |
| 31 | 59066 | C | 31 | 156464 | IR:IG:ACCD |
| 31 | 59068 | P | 31 | 156468 | IR:IG:ACCD |
| 67 | 59074 | P | 67 | 156483 | IR:IG:ACCD |
| 42 | 59074 | F | 42 | 59125  | IR:IG:ACCD |
| 42 | 59074 | P | 42 | 156391 | IR:IG:ACCD |
| 31 | 59085 | F | 31 | 59136  | IR:IG:ACCD |
| 31 | 59085 | P | 31 | 156391 | IR:IG:ACCD |
| 63 | 59104 | P | 63 | 156508 | IR:IG:ACCD |
| 42 | 59125 | P | 42 | 156442 | IR:IG:ACCD |
| 31 | 59136 | P | 31 | 156442 | IR:IG:ACCD |
| 31 | 59136 | P | 31 | 156508 | IR:IG:ACCD |
| 30 | 59656 | F | 30 | 59746  | IR:IG:ACCD |
| 30 | 59656 | P | 30 | 155782 | IR:IG:ACCD |
| 30 | 59746 | P | 30 | 155872 | IR:IG:ACCD |
| 30 | 61391 | C | 30 | 154140 | IR:IG:ACCD |
| 30 | 61617 | F | 30 | 61641  | IR:IG:ACCD |
| 30 | 61617 | P | 30 | 153887 | IR:IG:ACCD |
| 30 | 61641 | P | 30 | 153911 | IR:IG:ACCD |
| 78 | 62387 | F | 78 | 62423  | IR:IG:ACCD |
| 78 | 62387 | P | 78 | 153057 | IR:IG:ACCD |
| 42 | 62387 | F | 42 | 62459  | IR:IG:ACCD |
| 42 | 62387 | P | 42 | 153057 | IR:IG:ACCD |
| 57 | 62408 | F | 57 | 62444  | IR:IG:ACCD |
| 57 | 62408 | P | 57 | 153057 | IR:IG:ACCD |

|     |       |   |     |        |                  |
|-----|-------|---|-----|--------|------------------|
| 78  | 62423 | P | 78  | 153093 | IR:IG:ACCD       |
| 57  | 62444 | P | 57  | 153093 | IR:IG:ACCD       |
| 42  | 62459 | P | 42  | 153129 | IR:IG:ACCD       |
| 36  | 62858 | F | 36  | 63051  | IR:IG:ACCD       |
| 36  | 62858 | P | 36  | 152471 | IR:IG:ACCD       |
| 37  | 62918 | F | 37  | 63009  | IR:IG:ACCD       |
| 37  | 62918 | P | 37  | 152512 | IR:IG:ACCD       |
| 42  | 62943 | F | 42  | 62988  | IR:IG:ACCD       |
| 42  | 62943 | P | 42  | 152528 | IR:IG:ACCD       |
| 42  | 62988 | P | 42  | 152573 | IR:IG:ACCD       |
| 37  | 63009 | P | 37  | 152603 | IR:IG:ACCD       |
| 36  | 63051 | P | 36  | 152664 | IR:IG:ACCD       |
| 48  | 64807 | F | 48  | 65747  | IR:IG            |
| 48  | 64807 | P | 48  | 149763 | IR:IG            |
| 31  | 64824 | F | 31  | 65764  | IR:IG            |
| 31  | 64824 | P | 31  | 149763 | IR:IG            |
| 31  | 64909 | F | 31  | 65812  | IR:IG            |
| 31  | 64909 | P | 31  | 149715 | IR:IG            |
| 31  | 65649 | F | 31  | 65701  | IR:IG            |
| 31  | 65649 | P | 31  | 149826 | IR:IG            |
| 31  | 65701 | P | 31  | 149878 | IR:IG            |
| 48  | 65747 | P | 48  | 150703 | IR:IG            |
| 31  | 65764 | P | 31  | 150703 | IR:IG            |
| 31  | 65812 | P | 31  | 150618 | IR:IG            |
| 43  | 65926 | F | 43  | 66030  | <i>trnM</i> gene |
| 43  | 65926 | P | 43  | 149485 | <i>trnM</i> gene |
| 35  | 65936 | F | 35  | 65988  | <i>trnM</i> gene |
| 35  | 65936 | P | 35  | 149535 | <i>trnM</i> gene |
| 33  | 65988 | F | 33  | 66040  | IR:IG            |
| 33  | 65988 | P | 33  | 149485 | IR:IG            |
| 35  | 65988 | P | 35  | 149587 | IR:IG            |
| 43  | 66030 | P | 43  | 149589 | IR:IG            |
| 33  | 66040 | P | 33  | 149537 | IR:IG            |
| 30  | 69700 | F | 30  | 69712  | <i>clpP</i> gene |
| 30  | 69700 | P | 30  | 145816 | <i>clpP</i> gene |
| 30  | 69712 | P | 30  | 145828 | <i>clpP</i> gene |
| 376 | 70315 | F | 376 | 70390  | IR:IG            |
| 376 | 70315 | P | 376 | 144792 | IR:IG            |
| 301 | 70315 | F | 301 | 70465  | IR:IG            |
| 301 | 70315 | P | 301 | 144792 | IR:IG            |
| 226 | 70315 | F | 226 | 70540  | IR:IG            |
| 226 | 70315 | P | 226 | 144792 | IR:IG            |
| 151 | 70315 | F | 151 | 70615  | IR:IG            |
| 151 | 70315 | P | 151 | 144792 | IR:IG            |

|     |       |   |     |        |                   |
|-----|-------|---|-----|--------|-------------------|
| 76  | 70315 | F | 76  | 70690  | IR:IG             |
| 76  | 70315 | P | 76  | 144792 | IR:IG             |
| 343 | 70348 | F | 343 | 70423  | IR:IG             |
| 343 | 70348 | P | 343 | 144792 | IR:IG             |
| 268 | 70348 | F | 268 | 70498  | IR:IG             |
| 268 | 70348 | P | 268 | 144792 | IR:IG             |
| 193 | 70348 | F | 193 | 70573  | IR:IG             |
| 193 | 70348 | P | 193 | 144792 | IR:IG             |
| 118 | 70348 | F | 118 | 70648  | IR:IG             |
| 118 | 70348 | P | 118 | 144792 | IR:IG             |
| 43  | 70348 | F | 43  | 70723  | IR:IG             |
| 43  | 70348 | P | 43  | 144792 | IR:IG             |
| 376 | 70390 | P | 376 | 144867 | IR:IG             |
| 343 | 70423 | P | 343 | 144867 | IR:IG             |
| 301 | 70465 | P | 301 | 144942 | IR:IG             |
| 268 | 70498 | P | 268 | 144942 | IR:IG             |
| 226 | 70540 | P | 226 | 145017 | IR:IG             |
| 193 | 70573 | P | 193 | 145017 | IR:IG             |
| 151 | 70615 | P | 151 | 145092 | IR:IG             |
| 118 | 70648 | P | 118 | 145092 | IR:IG             |
| 76  | 70690 | P | 76  | 145167 | IR:IG             |
| 43  | 70723 | P | 43  | 145167 | IR:IG             |
| 50  | 73063 | P | 50  | 73063  | IR:IG             |
| 50  | 73063 | F | 50  | 142445 | IR:IG             |
| 30  | 73990 | F | 30  | 74019  | IR:IG             |
| 30  | 73990 | P | 30  | 141509 | IR:IG             |
| 30  | 74019 | P | 30  | 141538 | IR:IG             |
| 34  | 77926 | F | 34  | 77955  | IR:IG             |
| 34  | 77926 | P | 34  | 137569 | IR:IG             |
| 30  | 77935 | F | 30  | 77964  | IR:IG             |
| 30  | 77935 | P | 30  | 137564 | IR:IG             |
| 31  | 77950 | F | 31  | 84907  | IR:IG             |
| 31  | 77950 | P | 31  | 130620 | IR:IG             |
| 30  | 77951 | F | 30  | 84953  | IR:IG             |
| 30  | 77951 | P | 30  | 130575 | IR:IG             |
| 34  | 77955 | P | 34  | 137598 | IR:IG             |
| 30  | 77964 | P | 30  | 137593 | IR:IG             |
| 31  | 77982 | F | 31  | 78127  | IR:IG             |
| 31  | 77982 | P | 31  | 137400 | IR:IG             |
| 56  | 78000 | F | 56  | 78157  | IR:IG             |
| 56  | 78000 | P | 56  | 137345 | IR:IG             |
| 31  | 78127 | P | 31  | 137545 | IR:IG             |
| 56  | 78157 | P | 56  | 137502 | IR:IG             |
| 31  | 84907 | P | 31  | 137577 | <i>rpl23</i> gene |

|     |        |   |     |        |                   |
|-----|--------|---|-----|--------|-------------------|
| 31  | 84910  | F | 31  | 85000  | <i>rpl23</i> gene |
| 31  | 84910  | P | 31  | 130527 | <i>rpl23</i> gene |
| 70  | 84916  | F | 70  | 84961  | <i>rpl23</i> gene |
| 70  | 84916  | P | 70  | 130527 | <i>rpl23</i> gene |
| 30  | 84953  | P | 30  | 137577 | <i>rpl23</i> gene |
| 70  | 84961  | P | 70  | 130572 | <i>rpl23</i> gene |
| 31  | 85000  | P | 31  | 130617 | <i>rpl23</i> gene |
| 37  | 86061  | P | 37  | 86061  | IR:IG             |
| 37  | 86061  | F | 37  | 129460 | IR:IG             |
| 40  | 89679  | F | 40  | 111442 | IR:IG             |
| 30  | 89691  | F | 30  | 111454 | IR:IG             |
| 50  | 90341  | F | 50  | 90366  | IR:IG             |
| 50  | 90341  | P | 50  | 125142 | IR:IG             |
| 41  | 90350  | F | 41  | 90375  | IR:IG             |
| 41  | 90350  | P | 41  | 125142 | IR:IG             |
| 50  | 90366  | P | 50  | 125167 | IR:IG             |
| 41  | 90375  | P | 41  | 125167 | IR:IG             |
| 760 | 104582 | F | 760 | 104601 | SSC:IG            |
| 741 | 104582 | F | 741 | 104620 | SSC:IG            |
| 722 | 104582 | F | 722 | 104639 | SSC:IG            |
| 703 | 104582 | F | 703 | 104658 | SSC:IG            |
| 684 | 104582 | F | 684 | 104677 | SSC:IG            |
| 665 | 104582 | F | 665 | 104696 | SSC:IG            |
| 646 | 104582 | F | 646 | 104715 | SSC:IG            |
| 627 | 104582 | F | 627 | 104734 | SSC:IG            |
| 608 | 104582 | F | 608 | 104753 | SSC:IG            |
| 589 | 104582 | F | 589 | 104772 | SSC:IG            |
| 570 | 104582 | F | 570 | 104791 | SSC:IG            |
| 551 | 104582 | F | 551 | 104810 | SSC:IG            |
| 532 | 104582 | F | 532 | 104829 | SSC:IG            |
| 513 | 104582 | F | 513 | 104848 | SSC:IG            |
| 494 | 104582 | F | 494 | 104867 | SSC:IG            |
| 475 | 104582 | F | 475 | 104886 | SSC:IG            |
| 456 | 104582 | F | 456 | 104905 | SSC:IG            |
| 437 | 104582 | F | 437 | 104924 | SSC:IG            |
| 418 | 104582 | F | 418 | 104943 | SSC:IG            |
| 399 | 104582 | F | 399 | 104962 | SSC:IG            |
| 380 | 104582 | F | 380 | 104981 | SSC:IG            |
| 361 | 104582 | F | 361 | 105000 | SSC:IG            |
| 342 | 104582 | F | 342 | 105019 | SSC:IG            |
| 323 | 104582 | F | 323 | 105038 | SSC:IG            |
| 304 | 104582 | F | 304 | 105057 | SSC:IG            |
| 285 | 104582 | F | 285 | 105076 | SSC:IG            |
| 266 | 104582 | F | 266 | 105095 | SSC:IG            |

|     |        |   |     |        |                   |
|-----|--------|---|-----|--------|-------------------|
| 247 | 104582 | F | 247 | 105114 | SSC:IG            |
| 228 | 104582 | F | 228 | 105133 | SSC:IG            |
| 209 | 104582 | F | 209 | 105152 | SSC:IG            |
| 190 | 104582 | F | 190 | 105171 | SSC:IG            |
| 171 | 104582 | F | 171 | 105190 | SSC:IG            |
| 152 | 104582 | F | 152 | 105209 | SSC:IG            |
| 133 | 104582 | F | 133 | 105228 | SSC:IG            |
| 114 | 104582 | F | 114 | 105247 | SSC:IG            |
| 95  | 104582 | F | 95  | 105266 | SSC:IG            |
| 76  | 104582 | F | 76  | 105285 | SSC:IG            |
| 57  | 104582 | F | 57  | 105304 | SSC:IG            |
| 38  | 104582 | F | 38  | 105323 | SSC:IG            |
| 33  | 105356 | P | 33  | 105356 | SSC:IG            |
| 40  | 111442 | P | 40  | 125839 | <i>ndhA</i> gene  |
| 30  | 111454 | P | 30  | 125837 | <i>ndhA</i> gene  |
| 50  | 125142 | F | 50  | 125167 | IR:IG             |
| 37  | 129460 | P | 37  | 129460 | IR:IG             |
| 70  | 130527 | F | 70  | 130572 | <i>rpl23</i> gene |
| 31  | 130527 | F | 31  | 130617 | <i>rpl23</i> gene |
| 54  | 130543 | F | 54  | 130588 | <i>rpl23</i> gene |
| 30  | 130575 | F | 30  | 137577 | <i>rpl23</i> gene |
| 31  | 130620 | F | 31  | 137577 | <i>rpl23</i> gene |
| 56  | 137345 | F | 56  | 137502 | IR:IG             |
| 31  | 137400 | F | 31  | 137545 | IR:IG             |
| 34  | 137569 | F | 34  | 137598 | IR:IG             |
| 30  | 141509 | F | 30  | 141538 | IR:IG             |
| 50  | 142445 | P | 50  | 142445 | <i>psbN</i> gene  |
| 376 | 144792 | F | 376 | 144867 | IR:IG             |
| 301 | 144792 | F | 301 | 144942 | IR:IG             |
| 226 | 144792 | F | 226 | 145017 | IR:IG             |
| 151 | 144792 | F | 151 | 145092 | IR:IG             |
| 76  | 144792 | F | 76  | 145167 | IR:IG             |
| 32  | 144836 | F | 32  | 145211 | IR:IG             |
| 32  | 144911 | F | 32  | 145211 | IR:IG             |
| 32  | 144986 | F | 32  | 145211 | IR:IG             |
| 32  | 145061 | F | 32  | 145211 | IR:IG             |
| 32  | 145136 | F | 32  | 145211 | IR:IG             |
| 30  | 145820 | F | 30  | 145832 | <i>clpP</i> gene  |
| 43  | 149485 | F | 43  | 149589 | IR:IG             |
| 33  | 149485 | F | 33  | 149537 | IR:IG             |
| 30  | 149502 | F | 30  | 149606 | IR:IG             |
| 35  | 149535 | F | 35  | 149587 | IR:IG             |
| 31  | 149715 | F | 31  | 150618 | IR:IG             |
| 48  | 149763 | F | 48  | 150703 | IR:IG             |

|    |        |   |    |        |            |
|----|--------|---|----|--------|------------|
| 31 | 149826 | F | 31 | 149878 | IR:IG      |
| 36 | 152471 | F | 36 | 152664 | IR:IG:ACCD |
| 37 | 152512 | F | 37 | 152603 | IR:IG:ACCD |
| 42 | 152528 | F | 42 | 152573 | IR:IG:ACCD |
| 78 | 153057 | F | 78 | 153093 | IR:IG:ACCD |
| 42 | 153057 | F | 42 | 153129 | IR:IG:ACCD |
| 61 | 153074 | F | 61 | 153110 | IR:IG:ACCD |
| 30 | 153887 | F | 30 | 153911 | IR:IG:ACCD |
| 30 | 155782 | F | 30 | 155872 | IR:IG:ACCD |
| 63 | 156391 | F | 63 | 156508 | IR:IG:ACCD |
| 42 | 156391 | F | 42 | 156442 | IR:IG:ACCD |
| 67 | 156417 | F | 67 | 156483 | IR:IG:ACCD |
| 31 | 156423 | F | 31 | 156540 | IR:IG:ACCD |
| 39 | 156457 | F | 39 | 156460 | IR:IG:ACCD |
| 31 | 156459 | F | 31 | 156468 | IR:IG:ACCD |
| 31 | 156462 | F | 31 | 156468 | IR:IG:ACCD |
| 34 | 156464 | R | 34 | 156464 | IR:IG:ACCD |
| 31 | 156464 | R | 31 | 156464 | IR:IG:ACCD |
| 31 | 156466 | R | 31 | 156468 | IR:IG:ACCD |
| 30 | 156469 | R | 30 | 156469 | IR:IG:ACCD |
| 37 | 156483 | F | 37 | 156534 | IR:IG:ACCD |

*Passiflora vesperilio*

| Repeat Length 1 | Start Repeat 1 | Orientation | Repeat Length 2 | Start Repeat 2 | Location in cp genome |
|-----------------|----------------|-------------|-----------------|----------------|-----------------------|
| 48              | 2568           | P           | 48              | 2568           | LSC:IG                |
| 31              | 5464           | F           | 31              | 5476           | <i>clpP</i> gene      |
| 30              | 5693           | R           | 30              | 5693           | <i>clpP</i> gene      |
| 30              | 6732           | P           | 30              | 89566          | LSC:IG                |
| 30              | 6732           | F           | 30              | 121767         | LSC:IG                |
| 31              | 6788           | F           | 31              | 7010           | LSC:IG                |
| 31              | 6788           | F           | 31              | 7167           | LSC:IG                |
| 55              | 6789           | F           | 55              | 6835           | LSC:IG                |
| 30              | 6789           | F           | 30              | 6891           | LSC:IG                |
| 42              | 6802           | F           | 42              | 6848           | LSC:IG                |
| 42              | 6823           | F           | 42              | 6879           | LSC:IG                |
| 30              | 6835           | F           | 30              | 7168           | LSC:IG                |
| 40              | 6901           | F           | 40              | 7178           | LSC:IG                |
| 37              | 6904           | F           | 37              | 7024           | LSC:IG                |
| 34              | 6924           | F           | 34              | 6941           | LSC:IG                |
| 63              | 6958           | F           | 63              | 7201           | LSC:IG                |
| 67              | 6963           | F           | 67              | 7049           | LSC:IG                |
| 128             | 6965           | F           | 128             | 7122           | LSC:IG                |
| 127             | 6980           | F           | 127             | 7137           | LSC:IG                |

|    |       |   |    |        |                   |
|----|-------|---|----|--------|-------------------|
| 50 | 6980  | F | 50 | 7066   | LSC:IG            |
| 41 | 6980  | F | 41 | 7223   | LSC:IG            |
| 97 | 7010  | F | 97 | 7167   | LSC:IG            |
| 83 | 7024  | F | 83 | 7181   | LSC:IG            |
| 65 | 7051  | F | 65 | 7122   | LSC:IG            |
| 56 | 7122  | F | 56 | 7208   | LSC:IG            |
| 31 | 12695 | F | 31 | 56912  | LSC:IG            |
| 43 | 14357 | F | 43 | 14432  | LSC:IG            |
| 30 | 15070 | P | 30 | 51996  | LSC:IG            |
| 33 | 15339 | P | 33 | 15339  | LSC:IG            |
| 39 | 16386 | F | 39 | 91297  | <i>ycf3</i> gene  |
| 39 | 16386 | P | 39 | 120027 | <i>ycf3</i> gene  |
| 42 | 16386 | P | 42 | 109059 | <i>ycf3</i> gene  |
| 55 | 19337 | F | 55 | 21561  | <i>psaA</i> gene  |
| 50 | 19351 | F | 50 | 21575  | <i>psaA</i> gene  |
| 39 | 19379 | F | 39 | 21603  | <i>psaA</i> gene  |
| 35 | 19393 | F | 35 | 21617  | <i>psaA</i> gene  |
| 30 | 23807 | F | 30 | 50361  | LSC:IG            |
| 35 | 24403 | P | 35 | 24403  | LSC:IG            |
| 30 | 27965 | F | 30 | 27991  | LSC:IG            |
| 30 | 47513 | P | 30 | 47513  | LSC:IG            |
| 37 | 51431 | P | 37 | 51431  | LSC:IG            |
| 39 | 54831 | F | 39 | 54877  | LSC:IG            |
| 37 | 57317 | F | 37 | 57557  | <i>rps18</i> gene |
| 32 | 57346 | F | 32 | 57406  | <i>rps18</i> gene |
| 32 | 57346 | F | 32 | 57361  | <i>rps18</i> gene |
| 32 | 57346 | F | 32 | 57451  | <i>rps18</i> gene |
| 84 | 57355 | F | 84 | 57400  | <i>rps18</i> gene |
| 39 | 57355 | F | 39 | 57445  | <i>rps18</i> gene |
| 69 | 57370 | F | 69 | 57415  | <i>rps18</i> gene |
| 38 | 57385 | F | 38 | 57487  | <i>rps18</i> gene |
| 34 | 57385 | F | 34 | 57544  | <i>rps18</i> gene |
| 30 | 57410 | F | 30 | 57497  | <i>rps18</i> gene |
| 38 | 57430 | F | 38 | 57487  | <i>rps18</i> gene |
| 34 | 57430 | F | 34 | 57544  | <i>rps18</i> gene |
| 34 | 57445 | F | 34 | 57544  | <i>rps18</i> gene |
| 68 | 57457 | F | 68 | 57499  | <i>rps18</i> gene |
| 39 | 57482 | F | 39 | 57539  | <i>rps18</i> gene |
| 30 | 57492 | F | 30 | 57549  | <i>rps18</i> gene |
| 31 | 57524 | F | 31 | 57539  | <i>rps18</i> gene |
| 35 | 58198 | F | 35 | 66351  | LSC:IG            |
| 61 | 58218 | F | 61 | 66371  | LSC:IG            |
| 45 | 58234 | F | 45 | 66387  | LSC:IG            |
| 30 | 68802 | F | 30 | 68820  | LSC:IG:ACCD       |

|    |       |   |    |       |             |
|----|-------|---|----|-------|-------------|
| 51 | 69142 | F | 51 | 69217 | LSC:IG:ACCD |
| 43 | 69142 | F | 43 | 69307 | LSC:IG:ACCD |
| 36 | 69142 | F | 36 | 69187 | LSC:IG:ACCD |
| 42 | 69143 | F | 42 | 69323 | LSC:IG:ACCD |
| 42 | 69143 | F | 42 | 69233 | LSC:IG:ACCD |
| 42 | 69143 | F | 42 | 69248 | LSC:IG:ACCD |
| 40 | 69145 | F | 40 | 69370 | LSC:IG:ACCD |
| 33 | 69149 | F | 33 | 69344 | LSC:IG:ACCD |
| 42 | 69155 | F | 42 | 69230 | LSC:IG:ACCD |
| 56 | 69156 | F | 56 | 69276 | LSC:IG:ACCD |
| 37 | 69160 | F | 37 | 69370 | LSC:IG:ACCD |
| 31 | 69168 | F | 31 | 69378 | LSC:IG:ACCD |
| 44 | 69171 | F | 44 | 69201 | LSC:IG:ACCD |
| 37 | 69190 | F | 37 | 69370 | LSC:IG:ACCD |
| 41 | 69201 | F | 41 | 69291 | LSC:IG:ACCD |
| 37 | 69224 | F | 37 | 69374 | LSC:IG:ACCD |
| 71 | 69231 | F | 71 | 69246 | LSC:IG:ACCD |
| 71 | 69231 | F | 71 | 69261 | LSC:IG:ACCD |
| 59 | 69231 | F | 59 | 69336 | LSC:IG:ACCD |
| 56 | 69231 | F | 56 | 69321 | LSC:IG:ACCD |
| 56 | 69231 | F | 56 | 69276 | LSC:IG:ACCD |
| 44 | 69231 | F | 44 | 69351 | LSC:IG:ACCD |
| 41 | 69231 | F | 41 | 69291 | LSC:IG:ACCD |
| 69 | 69233 | F | 69 | 69308 | LSC:IG:ACCD |
| 74 | 69243 | F | 74 | 69333 | LSC:IG:ACCD |
| 59 | 69243 | F | 59 | 69318 | LSC:IG:ACCD |
| 30 | 69246 | F | 30 | 69381 | LSC:IG:ACCD |
| 57 | 69248 | F | 57 | 69308 | LSC:IG:ACCD |
| 47 | 69258 | F | 47 | 69318 | LSC:IG:ACCD |
| 44 | 69258 | F | 44 | 69333 | LSC:IG:ACCD |
| 30 | 69261 | F | 30 | 69381 | LSC:IG:ACCD |
| 42 | 69263 | F | 42 | 69308 | LSC:IG:ACCD |
| 47 | 69273 | F | 47 | 69333 | LSC:IG:ACCD |
| 44 | 69273 | F | 44 | 69318 | LSC:IG:ACCD |
| 32 | 69273 | F | 32 | 69378 | LSC:IG:ACCD |
| 41 | 69280 | F | 41 | 69370 | LSC:IG:ACCD |
| 36 | 69288 | F | 36 | 69333 | LSC:IG:ACCD |
| 30 | 69291 | F | 30 | 69381 | LSC:IG:ACCD |
| 39 | 69293 | F | 39 | 69308 | LSC:IG:ACCD |
| 54 | 69308 | F | 54 | 69323 | LSC:IG:ACCD |
| 42 | 69308 | F | 42 | 69353 | LSC:IG:ACCD |
| 39 | 69308 | F | 39 | 69338 | LSC:IG:ACCD |
| 32 | 69318 | F | 32 | 69348 | LSC:IG:ACCD |
| 30 | 69321 | F | 30 | 69381 | LSC:IG:ACCD |



|       |       |   |       |        |                   |
|-------|-------|---|-------|--------|-------------------|
| 41    | 69325 | F | 41    | 69370  | LSC:IG:ACCD       |
| 36    | 69333 | F | 36    | 69348  | LSC:IG:ACCD       |
| 32    | 69333 | F | 32    | 69363  | LSC:IG:ACCD       |
| 30    | 69336 | F | 30    | 69381  | LSC:IG:ACCD       |
| 35    | 69833 | P | 35    | 69833  | LSC:IG:ACCD       |
| 31    | 72367 | F | 31    | 72604  | LSC:IG            |
| 53    | 72372 | F | 53    | 72538  | LSC:IG            |
| 53    | 72372 | F | 53    | 72464  | LSC:IG            |
| 38    | 72387 | F | 38    | 72553  | LSC:IG            |
| 79    | 72443 | F | 79    | 72517  | LSC:IG            |
| 54    | 72473 | F | 54    | 72547  | LSC:IG            |
| 26196 | 72907 | P | 26196 | 112260 | IR                |
| 30    | 72944 | F | 30    | 73142  | IR:IG             |
| 30    | 72944 | P | 30    | 138191 | IR:IG             |
| 39    | 73010 | F | 39    | 73079  | IR:IG             |
| 39    | 73010 | P | 39    | 138245 | IR:IG             |
| 30    | 73043 | F | 30    | 73063  | IR:IG             |
| 30    | 73043 | P | 30    | 138270 | IR:IG             |
| 30    | 73063 | P | 30    | 138290 | IR:IG             |
| 39    | 73079 | P | 39    | 138314 | IR:IG             |
| 30    | 73142 | P | 30    | 138389 | IR:IG             |
| 37    | 75454 | P | 37    | 75454  | IR:IG             |
| 37    | 75454 | F | 37    | 135872 | IR:IG             |
| 151   | 76879 | F | 151   | 77032  | IR:IG             |
| 151   | 76879 | P | 151   | 134180 | IR:IG             |
| 43    | 76987 | F | 43    | 77140  | IR:IG             |
| 43    | 76987 | P | 43    | 134180 | IR:IG             |
| 151   | 77032 | P | 151   | 134333 | IR:IG             |
| 43    | 77140 | P | 43    | 134333 | IR:IG             |
| 47    | 79258 | F | 47    | 79281  | IR:IG             |
| 47    | 79258 | P | 47    | 132035 | IR:IG             |
| 47    | 79281 | P | 47    | 132058 | IR:IG             |
| 37    | 80094 | F | 37    | 80167  | IR:IG             |
| 37    | 80094 | P | 37    | 131159 | IR:IG             |
| 32    | 80128 | F | 32    | 80210  | IR:IG             |
| 32    | 80128 | P | 32    | 131121 | IR:IG             |
| 37    | 80167 | P | 37    | 131232 | IR:IG             |
| 32    | 80210 | P | 32    | 131203 | IR:IG             |
| 33    | 83723 | F | 33    | 83749  | <i>rrn23</i> gene |
| 33    | 83723 | F | 33    | 83781  | <i>rrn23</i> gene |
| 33    | 83723 | P | 33    | 127549 | <i>rrn23</i> gene |
| 33    | 83723 | P | 33    | 127581 | <i>rrn23</i> gene |
| 42    | 83749 | F | 42    | 83781  | <i>rrn23</i> gene |
| 42    | 83749 | P | 42    | 127540 | <i>rrn23</i> gene |

|     |       |   |     |        |                   |
|-----|-------|---|-----|--------|-------------------|
| 33  | 83749 | P | 33  | 127607 | <i>rrn23</i> gene |
| 32  | 83759 | F | 32  | 83819  | <i>rrn23</i> gene |
| 32  | 83759 | F | 32  | 83847  | <i>rrn23</i> gene |
| 32  | 83759 | F | 32  | 83875  | <i>rrn23</i> gene |
| 32  | 83759 | F | 32  | 83903  | <i>rrn23</i> gene |
| 32  | 83759 | P | 32  | 127428 | <i>rrn23</i> gene |
| 32  | 83759 | P | 32  | 127456 | <i>rrn23</i> gene |
| 32  | 83759 | P | 32  | 127484 | <i>rrn23</i> gene |
| 32  | 83759 | P | 32  | 127512 | <i>rrn23</i> gene |
| 42  | 83781 | P | 42  | 127572 | <i>rrn23</i> gene |
| 33  | 83781 | P | 33  | 127607 | <i>rrn23</i> gene |
| 131 | 83791 | F | 131 | 83819  | <i>rrn23</i> gene |
| 131 | 83791 | P | 131 | 127413 | <i>rrn23</i> gene |
| 103 | 83791 | F | 103 | 83847  | <i>rrn23</i> gene |
| 103 | 83791 | P | 103 | 127413 | <i>rrn23</i> gene |
| 75  | 83791 | F | 75  | 83875  | <i>rrn23</i> gene |
| 75  | 83791 | P | 75  | 127413 | <i>rrn23</i> gene |
| 47  | 83791 | F | 47  | 83903  | <i>rrn23</i> gene |
| 47  | 83791 | P | 47  | 127413 | <i>rrn23</i> gene |
| 120 | 83802 | F | 120 | 83830  | <i>rrn23</i> gene |
| 120 | 83802 | P | 120 | 127413 | <i>rrn23</i> gene |
| 92  | 83802 | F | 92  | 83858  | <i>rrn23</i> gene |
| 92  | 83802 | P | 92  | 127413 | <i>rrn23</i> gene |
| 64  | 83802 | F | 64  | 83886  | <i>rrn23</i> gene |
| 64  | 83802 | P | 64  | 127413 | <i>rrn23</i> gene |
| 36  | 83802 | F | 36  | 83914  | <i>rrn23</i> gene |
| 36  | 83802 | P | 36  | 127413 | <i>rrn23</i> gene |
| 131 | 83819 | P | 131 | 127441 | <i>rrn23</i> gene |
| 32  | 83819 | P | 32  | 127572 | <i>rrn23</i> gene |
| 120 | 83830 | P | 120 | 127441 | <i>rrn23</i> gene |
| 103 | 83847 | P | 103 | 127469 | <i>rrn23</i> gene |
| 32  | 83847 | P | 32  | 127572 | <i>rrn23</i> gene |
| 92  | 83858 | P | 92  | 127469 | <i>rrn23</i> gene |
| 75  | 83875 | P | 75  | 127497 | <i>rrn23</i> gene |
| 32  | 83875 | P | 32  | 127572 | <i>rrn23</i> gene |
| 64  | 83886 | P | 64  | 127497 | <i>rrn23</i> gene |
| 47  | 83903 | P | 47  | 127525 | <i>rrn23</i> gene |
| 32  | 83903 | P | 32  | 127572 | <i>rrn23</i> gene |
| 36  | 83914 | P | 36  | 127525 | <i>rrn23</i> gene |
| 105 | 90337 | F | 105 | 90362  | IR:IG             |
| 105 | 90337 | P | 105 | 120896 | IR:IG             |
| 80  | 90337 | F | 80  | 90387  | IR:IG             |
| 80  | 90337 | P | 80  | 120896 | IR:IG             |
| 55  | 90337 | F | 55  | 90412  | IR:IG             |

|     |        |   |     |        |                   |
|-----|--------|---|-----|--------|-------------------|
| 55  | 90337  | P | 55  | 120896 | IR:IG             |
| 30  | 90337  | F | 30  | 90437  | IR:IG             |
| 30  | 90337  | P | 30  | 120896 | IR:IG             |
| 105 | 90362  | P | 105 | 120921 | IR:IG             |
| 80  | 90387  | P | 80  | 120946 | IR:IG             |
| 55  | 90412  | P | 55  | 120971 | IR:IG             |
| 30  | 90437  | P | 30  | 120996 | IR:IG             |
| 30  | 91018  | F | 30  | 91037  | IR:IG             |
| 30  | 91018  | P | 30  | 120296 | IR:IG             |
| 30  | 91037  | P | 30  | 120315 | IR:IG             |
| 40  | 91296  | P | 40  | 109062 | IR:IG             |
| 37  | 94909  | P | 37  | 94909  | IR:IG             |
| 37  | 94909  | F | 37  | 116417 | IR:IG             |
| 33  | 94920  | F | 33  | 116428 | IR:IG             |
| 33  | 102887 | P | 33  | 102887 | SSC:IG            |
| 40  | 109062 | F | 40  | 120027 | <i>ndhA</i> gene  |
| 30  | 109074 | F | 30  | 120039 | <i>ndhA</i> gene  |
| 37  | 116417 | P | 37  | 116417 | IR:IG             |
| 30  | 120296 | F | 30  | 120315 | IR:IG             |
| 105 | 120896 | F | 105 | 120921 | IR:IG             |
| 80  | 120896 | F | 80  | 120946 | IR:IG             |
| 55  | 120896 | F | 55  | 120971 | IR:IG             |
| 30  | 120896 | F | 30  | 120996 | IR:IG             |
| 131 | 127413 | F | 131 | 127441 | <i>rrn23</i> gene |
| 103 | 127413 | F | 103 | 127469 | <i>rrn23</i> gene |
| 75  | 127413 | F | 75  | 127497 | <i>rrn23</i> gene |
| 47  | 127413 | F | 47  | 127525 | <i>rrn23</i> gene |
| 32  | 127428 | F | 32  | 127572 | <i>rrn23</i> gene |
| 32  | 127456 | F | 32  | 127572 | <i>rrn23</i> gene |
| 32  | 127484 | F | 32  | 127572 | <i>rrn23</i> gene |
| 32  | 127512 | F | 32  | 127572 | <i>rrn23</i> gene |
| 42  | 127540 | F | 42  | 127572 | <i>rrn23</i> gene |
| 33  | 127549 | F | 33  | 127607 | <i>rrn23</i> gene |
| 33  | 127581 | F | 33  | 127607 | <i>rrn23</i> gene |
| 32  | 131121 | F | 32  | 131203 | IR:IG             |
| 37  | 131159 | F | 37  | 131232 | IR:IG             |
| 47  | 132035 | F | 47  | 132058 | IR:IG             |
| 151 | 134180 | F | 151 | 134333 | IR:IG             |
| 107 | 134224 | F | 107 | 134377 | IR:IG             |
| 37  | 135872 | P | 37  | 135872 | IR:IG             |
| 30  | 138192 | F | 30  | 138390 | IR:IG             |
| 39  | 138245 | F | 39  | 138314 | IR:IG             |
| 30  | 138273 | F | 30  | 138293 | IR:IG             |

---

*Passiflora contracta*

| Repeat Length 1 | Start Repeat 1 | Orientation | Repeat Length 2 | Start Repeat 2 | Location in cp genome |
|-----------------|----------------|-------------|-----------------|----------------|-----------------------|
| 30              | 3274           | F           | 30              | 86787          | LSC:IG                |
| 34              | 7506           | P           | 34              | 7506           | LSC:IG                |
| 76              | 25133          | F           | 76              | 25206          | LSC:IG                |
| 83              | 25486          | F           | 83              | 26275          | LSC:IG                |
| 42              | 25511          | F           | 42              | 25967          | <i>trnC</i> gene      |
| 57              | 25512          | F           | 57              | 26301          | <i>trnC</i> gene      |
| 56              | 25557          | F           | 56              | 25701          | <i>trnC</i> gene      |
| 47              | 25610          | F           | 47              | 26074          | LSC:IG                |
| 34              | 25629          | F           | 34              | 25797          | LSC:IG                |
| 41              | 25973          | F           | 41              | 26306          | LSC:IG                |
| 81              | 38213          | F           | 81              | 40437          | <i>psaB</i> gene      |
| 41              | 38253          | F           | 41              | 40477          | <i>psaB</i> gene      |
| 39              | 43422          | F           | 39              | 101690         | <i>ycf3</i> gene      |
| 39              | 43422          | P           | 39              | 152143         | <i>ycf3</i> gene      |
| 38              | 43422          | F           | 38              | 130498         | <i>ycf3</i> gene      |
| 49              | 44615          | F           | 49              | 44660          | LSC:IG                |
| 34              | 46681          | F           | 34              | 46700          | LSC:IG                |
| 76              | 57017          | F           | 76              | 57035          | LSC:IG:ACCD           |
| 58              | 57017          | F           | 58              | 57053          | LSC:IG:ACCD           |
| 40              | 57017          | F           | 40              | 57071          | LSC:IG:ACCD           |
| 62              | 57031          | F           | 62              | 57049          | LSC:IG:ACCD           |
| 44              | 57031          | F           | 44              | 57067          | LSC:IG:ACCD           |
| 49              | 57262          | F           | 49              | 57568          | <i>accD</i> gene      |
| 48              | 57262          | F           | 48              | 57328          | <i>accD</i> gene      |
| 48              | 57262          | F           | 48              | 57376          | <i>accD</i> gene      |
| 48              | 57262          | F           | 48              | 57424          | <i>accD</i> gene      |
| 48              | 57262          | F           | 48              | 57472          | <i>accD</i> gene      |
| 48              | 57262          | F           | 48              | 57520          | <i>accD</i> gene      |
| 38              | 57273          | F           | 38              | 57579          | <i>accD</i> gene      |
| 37              | 57273          | F           | 37              | 57339          | <i>accD</i> gene      |
| 37              | 57273          | F           | 37              | 57387          | <i>accD</i> gene      |
| 37              | 57273          | F           | 37              | 57435          | <i>accD</i> gene      |
| 37              | 57273          | F           | 37              | 57483          | <i>accD</i> gene      |
| 37              | 57273          | F           | 37              | 57531          | <i>accD</i> gene      |
| 259             | 57309          | F           | 259             | 57357          | <i>accD</i> gene      |
| 211             | 57309          | F           | 211             | 57405          | <i>accD</i> gene      |
| 163             | 57309          | F           | 163             | 57453          | <i>accD</i> gene      |
| 115             | 57309          | F           | 115             | 57501          | <i>accD</i> gene      |
| 67              | 57309          | F           | 67              | 57549          | <i>accD</i> gene      |
| 122             | 57616          | F           | 122             | 57631          | <i>accD</i> gene      |
| 113             | 57616          | F           | 113             | 57646          | <i>accD</i> gene      |

|       |       |   |       |        |                   |
|-------|-------|---|-------|--------|-------------------|
| 98    | 57616 | F | 98    | 57661  | <i>accD</i> gene  |
| 83    | 57616 | F | 83    | 57676  | <i>accD</i> gene  |
| 68    | 57616 | F | 68    | 57691  | <i>accD</i> gene  |
| 53    | 57616 | F | 53    | 57706  | <i>accD</i> gene  |
| 51    | 59018 | F | 51    | 67335  | LSC:IG            |
| 42    | 59039 | F | 42    | 67356  | LSC:IG            |
| 71    | 68352 | F | 71    | 68682  | <i>rps18</i> gene |
| 52    | 68352 | F | 52    | 68526  | <i>rps18</i> gene |
| 124   | 68365 | F | 124   | 68695  | <i>rps18</i> gene |
| 39    | 68365 | F | 39    | 68539  | <i>rps18</i> gene |
| 102   | 68387 | F | 102   | 68717  | <i>rps18</i> gene |
| 160   | 68418 | F | 160   | 68574  | <i>rps18</i> gene |
| 65    | 68424 | F | 65    | 68754  | <i>rps18</i> gene |
| 45    | 68429 | F | 45    | 68549  | <i>rps18</i> gene |
| 43    | 68431 | F | 43    | 68569  | <i>rps18</i> gene |
| 47    | 68470 | F | 47    | 68785  | <i>rps18</i> gene |
| 35    | 68482 | F | 35    | 68797  | <i>rps18</i> gene |
| 45    | 68549 | F | 45    | 68585  | <i>rps18</i> gene |
| 45    | 68549 | F | 45    | 68759  | <i>rps18</i> gene |
| 43    | 68569 | F | 43    | 68587  | <i>rps18</i> gene |
| 43    | 68569 | F | 43    | 68761  | <i>rps18</i> gene |
| 71    | 68574 | F | 71    | 68748  | <i>rps18</i> gene |
| 47    | 68626 | F | 47    | 68785  | <i>rps18</i> gene |
| 35    | 68638 | F | 35    | 68797  | <i>rps18</i> gene |
| 41    | 70819 | F | 41    | 70915  | <i>clpP</i> gene  |
| 41    | 70819 | F | 41    | 70906  | <i>clpP</i> gene  |
| 33    | 70819 | F | 33    | 70924  | <i>clpP</i> gene  |
| 37    | 70820 | F | 37    | 70823  | <i>clpP</i> gene  |
| 38    | 70820 | F | 38    | 70919  | <i>clpP</i> gene  |
| 34    | 70820 | F | 34    | 70826  | <i>clpP</i> gene  |
| 40    | 70820 | F | 40    | 70910  | <i>clpP</i> gene  |
| 31    | 70820 | F | 31    | 70829  | <i>clpP</i> gene  |
| 37    | 70823 | F | 37    | 70916  | <i>clpP</i> gene  |
| 32    | 70823 | F | 32    | 70925  | <i>clpP</i> gene  |
| 37    | 70823 | F | 37    | 70907  | <i>clpP</i> gene  |
| 31    | 70829 | F | 31    | 70925  | <i>clpP</i> gene  |
| 50    | 70898 | F | 50    | 70907  | <i>clpP</i> gene  |
| 41    | 70898 | F | 41    | 70916  | <i>clpP</i> gene  |
| 42    | 70906 | F | 42    | 70915  | <i>clpP</i> gene  |
| 41    | 70910 | F | 41    | 70916  | <i>clpP</i> gene  |
| 38    | 70916 | F | 38    | 70919  | <i>clpP</i> gene  |
| 36    | 86193 | F | 36    | 86211  | LSC:IG            |
| 32866 | 87314 | P | 32866 | 133692 | IR                |
| 51    | 87436 | F | 51    | 89824  | IR:IG             |

|     |       |   |     |        |                  |
|-----|-------|---|-----|--------|------------------|
| 51  | 87436 | P | 51  | 163997 | IR:IG            |
| 38  | 87449 | F | 38  | 89837  | IR:IG            |
| 38  | 87449 | P | 38  | 163997 | IR:IG            |
| 53  | 87462 | F | 53  | 89717  | IR:IG            |
| 53  | 87462 | P | 53  | 164102 | IR:IG            |
| 49  | 87472 | F | 49  | 89727  | IR:IG            |
| 49  | 87472 | P | 49  | 164096 | IR:IG            |
| 384 | 87480 | F | 384 | 89899  | IR:IG            |
| 384 | 87480 | P | 384 | 163589 | IR:IG            |
| 348 | 87522 | F | 348 | 89941  | IR:IG            |
| 348 | 87522 | P | 348 | 163583 | IR:IG            |
| 228 | 87716 | F | 228 | 90135  | <i>trnM</i> gene |
| 228 | 87716 | P | 228 | 163509 | <i>trnM</i> gene |
| 163 | 87794 | F | 163 | 90213  | IR:IG            |
| 163 | 87794 | P | 163 | 163496 | IR:IG            |
| 52  | 87825 | F | 52  | 90284  | IR:IG            |
| 52  | 87825 | P | 52  | 163536 | IR:IG            |
| 52  | 87825 | F | 52  | 87865  | IR:IG            |
| 52  | 87825 | P | 52  | 165955 | IR:IG            |
| 92  | 87865 | F | 92  | 90284  | IR:IG            |
| 92  | 87865 | P | 92  | 163496 | IR:IG            |
| 52  | 87865 | P | 52  | 165995 | IR:IG            |
| 52  | 87865 | F | 52  | 90244  | IR:IG            |
| 52  | 87865 | P | 52  | 163576 | IR:IG            |
| 40  | 87886 | F | 40  | 90345  | IR:IG            |
| 40  | 87886 | P | 40  | 163487 | IR:IG            |
| 38  | 87929 | F | 38  | 90392  | IR:IG            |
| 38  | 87929 | P | 38  | 163442 | IR:IG            |
| 53  | 89717 | P | 53  | 166357 | IR:IG            |
| 49  | 89727 | P | 49  | 166351 | IR:IG            |
| 41  | 89735 | F | 41  | 89899  | IR:IG            |
| 41  | 89735 | P | 41  | 163932 | IR:IG            |
| 51  | 89824 | P | 51  | 166385 | IR:IG            |
| 38  | 89837 | P | 38  | 166385 | IR:IG            |
| 384 | 89899 | P | 384 | 166008 | IR:IG            |
| 41  | 89899 | P | 41  | 164096 | IR:IG            |
| 348 | 89941 | P | 348 | 166002 | IR:IG            |
| 228 | 90135 | P | 228 | 165928 | <i>trnM</i> gene |
| 163 | 90213 | P | 163 | 165915 | IR:IG            |
| 52  | 90244 | F | 52  | 90284  | IR:IG            |
| 52  | 90244 | P | 52  | 163536 | IR:IG            |
| 52  | 90244 | P | 52  | 165955 | IR:IG            |
| 92  | 90284 | P | 92  | 165915 | IR:IG            |
| 52  | 90284 | P | 52  | 165995 | IR:IG            |

|     |        |   |     |        |                  |
|-----|--------|---|-----|--------|------------------|
| 52  | 90284  | P | 52  | 163576 | IR:IG            |
| 40  | 90305  | F | 40  | 90345  | IR:IG            |
| 40  | 90305  | P | 40  | 163487 | IR:IG            |
| 40  | 90345  | P | 40  | 163527 | IR:IG            |
| 40  | 90345  | P | 40  | 165946 | IR:IG            |
| 38  | 90392  | P | 38  | 165905 | IR:IG            |
| 36  | 92132  | F | 36  | 92159  | <i>ycf2</i> gene |
| 36  | 92132  | P | 36  | 161677 | <i>ycf2</i> gene |
| 36  | 92159  | P | 36  | 161704 | <i>ycf2</i> gene |
| 48  | 92206  | F | 48  | 92251  | <i>ycf2</i> gene |
| 48  | 92206  | P | 48  | 161573 | <i>ycf2</i> gene |
| 42  | 92218  | F | 42  | 92263  | <i>ycf2</i> gene |
| 42  | 92218  | P | 42  | 161567 | <i>ycf2</i> gene |
| 48  | 92251  | P | 48  | 161618 | <i>ycf2</i> gene |
| 42  | 92263  | P | 42  | 161612 | <i>ycf2</i> gene |
| 41  | 96015  | F | 41  | 96081  | <i>ycf2</i> gene |
| 41  | 96015  | P | 41  | 157750 | <i>ycf2</i> gene |
| 41  | 96081  | P | 41  | 157816 | <i>ycf2</i> gene |
| 49  | 97642  | P | 49  | 97642  | IR:IG            |
| 49  | 97642  | F | 49  | 156181 | IR:IG            |
| 38  | 101690 | F | 38  | 130498 | IR:IG            |
| 42  | 102126 | F | 42  | 102161 | IR:IG            |
| 42  | 102126 | P | 42  | 151669 | IR:IG            |
| 42  | 102161 | P | 42  | 151704 | IR:IG            |
| 427 | 112118 | F | 427 | 112236 | IR:IG            |
| 427 | 112118 | P | 427 | 141209 | IR:IG            |
| 309 | 112118 | F | 309 | 112354 | IR:IG            |
| 309 | 112118 | P | 309 | 141209 | IR:IG            |
| 191 | 112118 | F | 191 | 112472 | IR:IG            |
| 191 | 112118 | P | 191 | 141209 | IR:IG            |
| 73  | 112118 | F | 73  | 112590 | IR:IG            |
| 73  | 112118 | P | 73  | 141209 | IR:IG            |
| 427 | 112236 | P | 427 | 141327 | IR:IG            |
| 309 | 112354 | P | 309 | 141445 | IR:IG            |
| 191 | 112472 | P | 191 | 141563 | IR:IG            |
| 73  | 112590 | P | 73  | 141681 | IR:IG            |
| 57  | 115644 | F | 57  | 115914 | <i>ycf1</i> gene |
| 57  | 115644 | P | 57  | 137901 | <i>ycf1</i> gene |
| 68  | 115657 | F | 68  | 115855 | <i>ycf1</i> gene |
| 68  | 115657 | P | 68  | 137949 | <i>ycf1</i> gene |
| 48  | 115657 | F | 48  | 116140 | <i>ycf1</i> gene |
| 48  | 115657 | F | 48  | 116248 | <i>ycf1</i> gene |
| 48  | 115657 | P | 48  | 137576 | <i>ycf1</i> gene |
| 48  | 115657 | P | 48  | 137684 | <i>ycf1</i> gene |

|     |        |   |     |        |                  |
|-----|--------|---|-----|--------|------------------|
| 50  | 115663 | F | 50  | 115933 | <i>ycfI</i> gene |
| 50  | 115663 | P | 50  | 137889 | <i>ycfI</i> gene |
| 40  | 115673 | F | 40  | 115943 | <i>ycfI</i> gene |
| 40  | 115673 | P | 40  | 137889 | <i>ycfI</i> gene |
| 40  | 115673 | F | 40  | 116264 | <i>ycfI</i> gene |
| 40  | 115673 | P | 40  | 137568 | <i>ycfI</i> gene |
| 39  | 115677 | F | 39  | 116214 | <i>ycfI</i> gene |
| 39  | 115677 | P | 39  | 137619 | <i>ycfI</i> gene |
| 43  | 115679 | F | 43  | 115706 | <i>ycfI</i> gene |
| 43  | 115679 | P | 43  | 138123 | <i>ycfI</i> gene |
| 42  | 115680 | F | 42  | 115992 | <i>ycfI</i> gene |
| 42  | 115680 | P | 42  | 137838 | <i>ycfI</i> gene |
| 44  | 115681 | F | 44  | 115825 | <i>ycfI</i> gene |
| 44  | 115681 | F | 44  | 116110 | <i>ycfI</i> gene |
| 44  | 115681 | P | 44  | 137718 | <i>ycfI</i> gene |
| 44  | 115681 | P | 44  | 138003 | <i>ycfI</i> gene |
| 42  | 115685 | F | 42  | 115757 | <i>ycfI</i> gene |
| 42  | 115685 | F | 42  | 116042 | <i>ycfI</i> gene |
| 42  | 115685 | P | 42  | 137788 | <i>ycfI</i> gene |
| 42  | 115685 | P | 42  | 138073 | <i>ycfI</i> gene |
| 37  | 115688 | F | 37  | 116225 | <i>ycfI</i> gene |
| 37  | 115688 | P | 37  | 137610 | <i>ycfI</i> gene |
| 188 | 115696 | F | 188 | 115981 | <i>ycfI</i> gene |
| 188 | 115696 | P | 188 | 137703 | <i>ycfI</i> gene |
| 47  | 115702 | F | 47  | 115819 | <i>ycfI</i> gene |
| 47  | 115702 | F | 47  | 116104 | <i>ycfI</i> gene |
| 47  | 115702 | P | 47  | 137721 | <i>ycfI</i> gene |
| 47  | 115702 | P | 47  | 138006 | <i>ycfI</i> gene |
| 61  | 115706 | F | 61  | 115877 | <i>ycfI</i> gene |
| 61  | 115706 | P | 61  | 137934 | <i>ycfI</i> gene |
| 43  | 115706 | P | 43  | 138150 | <i>ycfI</i> gene |
| 42  | 115712 | F | 42  | 115928 | <i>ycfI</i> gene |
| 42  | 115712 | P | 42  | 137902 | <i>ycfI</i> gene |
| 63  | 115729 | F | 63  | 115900 | <i>ycfI</i> gene |
| 63  | 115729 | P | 63  | 137909 | <i>ycfI</i> gene |
| 42  | 115750 | F | 42  | 115921 | <i>ycfI</i> gene |
| 42  | 115750 | P | 42  | 137909 | <i>ycfI</i> gene |
| 42  | 115757 | P | 42  | 138145 | <i>ycfI</i> gene |
| 40  | 115757 | F | 40  | 115829 | <i>ycfI</i> gene |
| 40  | 115757 | F | 40  | 116114 | <i>ycfI</i> gene |
| 40  | 115757 | P | 40  | 137718 | <i>ycfI</i> gene |
| 40  | 115757 | P | 40  | 138003 | <i>ycfI</i> gene |
| 40  | 115757 | F | 40  | 115883 | <i>ycfI</i> gene |
| 40  | 115757 | P | 40  | 137949 | <i>ycfI</i> gene |



|    |        |   |    |        |                  |
|----|--------|---|----|--------|------------------|
| 98 | 115805 | F | 98 | 116090 | <i>ycfI</i> gene |
| 98 | 115805 | P | 98 | 137684 | <i>ycfI</i> gene |
| 56 | 115814 | F | 56 | 115841 | <i>ycfI</i> gene |
| 56 | 115814 | P | 56 | 137975 | <i>ycfI</i> gene |
| 43 | 115814 | F | 43 | 116126 | <i>ycfI</i> gene |
| 43 | 115814 | P | 43 | 137703 | <i>ycfI</i> gene |
| 53 | 115817 | F | 53 | 115871 | <i>ycfI</i> gene |
| 53 | 115817 | P | 53 | 137948 | <i>ycfI</i> gene |
| 47 | 115819 | P | 47 | 138123 | <i>ycfI</i> gene |
| 45 | 115825 | F | 45 | 115852 | <i>ycfI</i> gene |
| 45 | 115825 | P | 45 | 137975 | <i>ycfI</i> gene |
| 44 | 115825 | P | 44 | 138147 | <i>ycfI</i> gene |
| 45 | 115825 | F | 45 | 115993 | <i>ycfI</i> gene |
| 45 | 115825 | P | 45 | 137834 | <i>ycfI</i> gene |
| 55 | 115829 | F | 55 | 115928 | <i>ycfI</i> gene |
| 55 | 115829 | P | 55 | 137889 | <i>ycfI</i> gene |
| 40 | 115829 | F | 40 | 116042 | <i>ycfI</i> gene |
| 40 | 115829 | P | 40 | 137790 | <i>ycfI</i> gene |
| 40 | 115829 | P | 40 | 138075 | <i>ycfI</i> gene |
| 56 | 115841 | F | 56 | 116099 | <i>ycfI</i> gene |
| 56 | 115841 | P | 56 | 137717 | <i>ycfI</i> gene |
| 56 | 115841 | P | 56 | 138002 | <i>ycfI</i> gene |
| 48 | 115850 | F | 48 | 115877 | <i>ycfI</i> gene |
| 48 | 115850 | P | 48 | 137947 | <i>ycfI</i> gene |
| 45 | 115852 | F | 45 | 116110 | <i>ycfI</i> gene |
| 45 | 115852 | P | 45 | 137717 | <i>ycfI</i> gene |
| 45 | 115852 | P | 45 | 138002 | <i>ycfI</i> gene |
| 68 | 115855 | P | 68 | 138147 | <i>ycfI</i> gene |
| 47 | 115856 | F | 47 | 115928 | <i>ycfI</i> gene |
| 47 | 115856 | P | 47 | 137897 | <i>ycfI</i> gene |
| 53 | 115871 | F | 53 | 116102 | <i>ycfI</i> gene |
| 53 | 115871 | P | 53 | 137717 | <i>ycfI</i> gene |
| 53 | 115871 | P | 53 | 138002 | <i>ycfI</i> gene |
| 40 | 115871 | F | 40 | 115943 | <i>ycfI</i> gene |
| 40 | 115871 | P | 40 | 137889 | <i>ycfI</i> gene |
| 61 | 115877 | P | 61 | 138105 | <i>ycfI</i> gene |
| 48 | 115877 | P | 48 | 137974 | <i>ycfI</i> gene |
| 60 | 115878 | F | 60 | 115992 | <i>ycfI</i> gene |
| 60 | 115878 | P | 60 | 137820 | <i>ycfI</i> gene |
| 42 | 115883 | F | 42 | 115928 | <i>ycfI</i> gene |
| 42 | 115883 | P | 42 | 137902 | <i>ycfI</i> gene |
| 40 | 115883 | F | 40 | 116042 | <i>ycfI</i> gene |
| 40 | 115883 | P | 40 | 137790 | <i>ycfI</i> gene |
| 40 | 115883 | P | 40 | 138075 | <i>ycfI</i> gene |

|     |        |   |     |        |                  |
|-----|--------|---|-----|--------|------------------|
| 39  | 115886 | F | 39  | 116225 | <i>ycfI</i> gene |
| 39  | 115886 | P | 39  | 137608 | <i>ycfI</i> gene |
| 63  | 115900 | F | 63  | 116014 | <i>ycfI</i> gene |
| 63  | 115900 | P | 63  | 137795 | <i>ycfI</i> gene |
| 63  | 115900 | P | 63  | 138080 | <i>ycfI</i> gene |
| 57  | 115914 | P | 57  | 138171 | <i>ycfI</i> gene |
| 42  | 115921 | F | 42  | 116035 | <i>ycfI</i> gene |
| 42  | 115921 | P | 42  | 137795 | <i>ycfI</i> gene |
| 42  | 115921 | P | 42  | 138080 | <i>ycfI</i> gene |
| 57  | 115928 | F | 57  | 116114 | <i>ycfI</i> gene |
| 57  | 115928 | P | 57  | 137701 | <i>ycfI</i> gene |
| 55  | 115928 | P | 55  | 137988 | <i>ycfI</i> gene |
| 47  | 115928 | P | 47  | 137969 | <i>ycfI</i> gene |
| 43  | 115928 | F | 43  | 116141 | <i>ycfI</i> gene |
| 43  | 115928 | P | 43  | 137688 | <i>ycfI</i> gene |
| 42  | 115928 | F | 42  | 115997 | <i>ycfI</i> gene |
| 42  | 115928 | P | 42  | 137833 | <i>ycfI</i> gene |
| 42  | 115928 | P | 42  | 137947 | <i>ycfI</i> gene |
| 42  | 115928 | P | 42  | 138118 | <i>ycfI</i> gene |
| 73  | 115933 | F | 73  | 116254 | <i>ycfI</i> gene |
| 73  | 115933 | P | 73  | 137545 | <i>ycfI</i> gene |
| 50  | 115933 | P | 50  | 138159 | <i>ycfI</i> gene |
| 40  | 115943 | P | 40  | 138159 | <i>ycfI</i> gene |
| 40  | 115943 | P | 40  | 137961 | <i>ycfI</i> gene |
| 59  | 115947 | F | 59  | 116268 | <i>ycfI</i> gene |
| 59  | 115947 | P | 59  | 137545 | <i>ycfI</i> gene |
| 50  | 115956 | F | 50  | 116277 | <i>ycfI</i> gene |
| 50  | 115956 | P | 50  | 137545 | <i>ycfI</i> gene |
| 34  | 115972 | F | 34  | 116293 | <i>ycfI</i> gene |
| 34  | 115972 | P | 34  | 137545 | <i>ycfI</i> gene |
| 188 | 115981 | P | 188 | 137988 | <i>ycfI</i> gene |
| 60  | 115992 | P | 60  | 137934 | <i>ycfI</i> gene |
| 42  | 115992 | P | 42  | 138150 | <i>ycfI</i> gene |
| 45  | 115993 | F | 45  | 116110 | <i>ycfI</i> gene |
| 45  | 115993 | P | 45  | 137717 | <i>ycfI</i> gene |
| 45  | 115993 | P | 45  | 138002 | <i>ycfI</i> gene |
| 42  | 115997 | P | 42  | 137902 | <i>ycfI</i> gene |
| 63  | 116014 | P | 63  | 137909 | <i>ycfI</i> gene |
| 42  | 116035 | P | 42  | 137909 | <i>ycfI</i> gene |
| 42  | 116042 | P | 42  | 138145 | <i>ycfI</i> gene |
| 40  | 116042 | F | 40  | 116114 | <i>ycfI</i> gene |
| 40  | 116042 | P | 40  | 137718 | <i>ycfI</i> gene |
| 40  | 116042 | P | 40  | 138003 | <i>ycfI</i> gene |
| 40  | 116042 | P | 40  | 137949 | <i>ycfI</i> gene |

|    |        |   |    |        |                  |
|----|--------|---|----|--------|------------------|
| 98 | 116090 | P | 98 | 137969 | <i>ycfI</i> gene |
| 56 | 116099 | P | 56 | 137975 | <i>ycfI</i> gene |
| 43 | 116099 | F | 43 | 116126 | <i>ycfI</i> gene |
| 43 | 116099 | P | 43 | 137703 | <i>ycfI</i> gene |
| 53 | 116102 | P | 53 | 137948 | <i>ycfI</i> gene |
| 47 | 116104 | P | 47 | 138123 | <i>ycfI</i> gene |
| 45 | 116110 | P | 45 | 137975 | <i>ycfI</i> gene |
| 44 | 116110 | P | 44 | 138147 | <i>ycfI</i> gene |
| 45 | 116110 | P | 45 | 137834 | <i>ycfI</i> gene |
| 57 | 116114 | P | 57 | 137887 | <i>ycfI</i> gene |
| 40 | 116114 | P | 40 | 137790 | <i>ycfI</i> gene |
| 40 | 116114 | P | 40 | 138075 | <i>ycfI</i> gene |
| 43 | 116126 | P | 43 | 137730 | <i>ycfI</i> gene |
| 43 | 116126 | P | 43 | 138015 | <i>ycfI</i> gene |
| 48 | 116140 | P | 48 | 138167 | <i>ycfI</i> gene |
| 43 | 116141 | P | 43 | 137901 | <i>ycfI</i> gene |
| 76 | 116146 | F | 76 | 116200 | <i>ycfI</i> gene |
| 76 | 116146 | P | 76 | 137596 | <i>ycfI</i> gene |
| 62 | 116160 | F | 62 | 116214 | <i>ycfI</i> gene |
| 62 | 116160 | P | 62 | 137596 | <i>ycfI</i> gene |
| 53 | 116189 | F | 53 | 116243 | <i>ycfI</i> gene |
| 53 | 116189 | P | 53 | 137576 | <i>ycfI</i> gene |
| 76 | 116200 | P | 76 | 137650 | <i>ycfI</i> gene |
| 62 | 116214 | P | 62 | 137650 | <i>ycfI</i> gene |
| 39 | 116214 | P | 39 | 138156 | <i>ycfI</i> gene |
| 37 | 116225 | P | 37 | 138147 | <i>ycfI</i> gene |
| 39 | 116225 | P | 39 | 137947 | <i>ycfI</i> gene |
| 53 | 116243 | P | 53 | 137630 | <i>ycfI</i> gene |
| 48 | 116248 | P | 48 | 138167 | <i>ycfI</i> gene |
| 73 | 116254 | P | 73 | 137866 | <i>ycfI</i> gene |
| 40 | 116264 | P | 40 | 138159 | <i>ycfI</i> gene |
| 59 | 116268 | P | 59 | 137866 | <i>ycfI</i> gene |
| 50 | 116277 | P | 50 | 137866 | <i>ycfI</i> gene |
| 34 | 116293 | P | 34 | 137866 | <i>ycfI</i> gene |
| 51 | 117542 | F | 51 | 117563 | <i>ycfI</i> gene |
| 51 | 117542 | P | 51 | 136258 | <i>ycfI</i> gene |
| 30 | 117542 | F | 30 | 117584 | <i>ycfI</i> gene |
| 51 | 117563 | P | 51 | 136279 | <i>ycfI</i> gene |
| 78 | 119406 | F | 78 | 119487 | <i>ycfI</i> gene |
| 78 | 119406 | P | 78 | 134307 | <i>ycfI</i> gene |
| 64 | 119420 | F | 64 | 119501 | <i>ycfI</i> gene |
| 64 | 119420 | P | 64 | 134307 | <i>ycfI</i> gene |
| 41 | 119443 | F | 41 | 119524 | <i>ycfI</i> gene |
| 41 | 119443 | P | 41 | 134307 | <i>ycfI</i> gene |

|     |        |   |     |        |                  |
|-----|--------|---|-----|--------|------------------|
| 78  | 119487 | P | 78  | 134388 | <i>ycfI</i> gene |
| 64  | 119501 | P | 64  | 134388 | <i>ycfI</i> gene |
| 41  | 119524 | P | 41  | 134388 | <i>ycfI</i> gene |
| 54  | 127061 | P | 54  | 127061 | SSC:IG           |
| 38  | 130498 | P | 38  | 152144 | <i>ndhA</i> gene |
| 78  | 134307 | F | 78  | 134388 | <i>ycfI</i> gene |
| 51  | 136258 | F | 51  | 136279 | <i>ycfI</i> gene |
| 73  | 137545 | F | 73  | 137866 | <i>ycfI</i> gene |
| 40  | 137568 | F | 40  | 138159 | <i>ycfI</i> gene |
| 53  | 137576 | F | 53  | 137630 | <i>ycfI</i> gene |
| 48  | 137576 | F | 48  | 138167 | <i>ycfI</i> gene |
| 43  | 137580 | F | 43  | 137901 | <i>ycfI</i> gene |
| 76  | 137596 | F | 76  | 137650 | <i>ycfI</i> gene |
| 39  | 137608 | F | 39  | 137947 | <i>ycfI</i> gene |
| 37  | 137610 | F | 37  | 138147 | <i>ycfI</i> gene |
| 39  | 137619 | F | 39  | 138156 | <i>ycfI</i> gene |
| 49  | 137630 | F | 49  | 137684 | <i>ycfI</i> gene |
| 98  | 137684 | F | 98  | 137969 | <i>ycfI</i> gene |
| 48  | 137684 | F | 48  | 138167 | <i>ycfI</i> gene |
| 43  | 137688 | F | 43  | 137901 | <i>ycfI</i> gene |
| 186 | 137694 | F | 186 | 137979 | <i>ycfI</i> gene |
| 57  | 137701 | F | 57  | 137887 | <i>ycfI</i> gene |
| 188 | 137703 | F | 188 | 137988 | <i>ycfI</i> gene |
| 43  | 137703 | F | 43  | 137730 | <i>ycfI</i> gene |
| 43  | 137703 | F | 43  | 138015 | <i>ycfI</i> gene |
| 41  | 137711 | F | 41  | 138023 | <i>ycfI</i> gene |
| 56  | 137717 | F | 56  | 137975 | <i>ycfI</i> gene |
| 53  | 137717 | F | 53  | 137948 | <i>ycfI</i> gene |
| 45  | 137717 | F | 45  | 137834 | <i>ycfI</i> gene |
| 41  | 137717 | F | 41  | 137903 | <i>ycfI</i> gene |
| 41  | 137717 | F | 41  | 137744 | <i>ycfI</i> gene |
| 44  | 137718 | F | 44  | 138147 | <i>ycfI</i> gene |
| 40  | 137718 | F | 40  | 137790 | <i>ycfI</i> gene |
| 40  | 137718 | F | 40  | 138075 | <i>ycfI</i> gene |
| 47  | 137721 | F | 47  | 138123 | <i>ycfI</i> gene |
| 41  | 137744 | F | 41  | 138002 | <i>ycfI</i> gene |
| 108 | 137783 | F | 108 | 138068 | <i>ycfI</i> gene |
| 42  | 137788 | F | 42  | 138145 | <i>ycfI</i> gene |
| 40  | 137790 | F | 40  | 138003 | <i>ycfI</i> gene |
| 40  | 137790 | F | 40  | 137949 | <i>ycfI</i> gene |
| 63  | 137795 | F | 63  | 137909 | <i>ycfI</i> gene |
| 48  | 137810 | F | 48  | 137924 | <i>ycfI</i> gene |
| 60  | 137820 | F | 60  | 137934 | <i>ycfI</i> gene |
| 42  | 137833 | F | 42  | 137902 | <i>ycfI</i> gene |

|     |        |   |     |        |                  |
|-----|--------|---|-----|--------|------------------|
| 45  | 137834 | F | 45  | 138002 | <i>ycf1</i> gene |
| 42  | 137838 | F | 42  | 137952 | <i>ycf1</i> gene |
| 42  | 137838 | F | 42  | 138150 | <i>ycf1</i> gene |
| 55  | 137889 | F | 55  | 137988 | <i>ycf1</i> gene |
| 50  | 137889 | F | 50  | 138159 | <i>ycf1</i> gene |
| 40  | 137889 | F | 40  | 137961 | <i>ycf1</i> gene |
| 47  | 137897 | F | 47  | 137969 | <i>ycf1</i> gene |
| 57  | 137901 | F | 57  | 138171 | <i>ycf1</i> gene |
| 42  | 137902 | F | 42  | 137947 | <i>ycf1</i> gene |
| 42  | 137902 | F | 42  | 138118 | <i>ycf1</i> gene |
| 41  | 137903 | F | 41  | 138002 | <i>ycf1</i> gene |
| 63  | 137909 | F | 63  | 138080 | <i>ycf1</i> gene |
| 48  | 137924 | F | 48  | 138095 | <i>ycf1</i> gene |
| 61  | 137934 | F | 61  | 138105 | <i>ycf1</i> gene |
| 48  | 137947 | F | 48  | 137974 | <i>ycf1</i> gene |
| 53  | 137948 | F | 53  | 138002 | <i>ycf1</i> gene |
| 68  | 137949 | F | 68  | 138147 | <i>ycf1</i> gene |
| 40  | 137949 | F | 40  | 138075 | <i>ycf1</i> gene |
| 47  | 137952 | F | 47  | 138123 | <i>ycf1</i> gene |
| 56  | 137975 | F | 56  | 138002 | <i>ycf1</i> gene |
| 38  | 137979 | F | 38  | 138177 | <i>ycf1</i> gene |
| 41  | 137996 | F | 41  | 138023 | <i>ycf1</i> gene |
| 44  | 138003 | F | 44  | 138147 | <i>ycf1</i> gene |
| 40  | 138003 | F | 40  | 138075 | <i>ycf1</i> gene |
| 47  | 138006 | F | 47  | 138123 | <i>ycf1</i> gene |
| 42  | 138073 | F | 42  | 138145 | <i>ycf1</i> gene |
| 43  | 138123 | F | 43  | 138150 | <i>ycf1</i> gene |
| 427 | 141209 | F | 427 | 141327 | IR:IG            |
| 309 | 141209 | F | 309 | 141445 | IR:IG            |
| 191 | 141209 | F | 191 | 141563 | IR:IG            |
| 73  | 141209 | F | 73  | 141681 | IR:IG            |
| 42  | 151669 | F | 42  | 151704 | IR:IG            |
| 49  | 156181 | P | 49  | 156181 | IR:IG            |
| 41  | 157750 | F | 41  | 157816 | <i>ycf2</i> gene |
| 48  | 161573 | F | 48  | 161618 | <i>ycf2</i> gene |
| 36  | 161677 | F | 36  | 161704 | <i>ycf2</i> gene |
| 38  | 163442 | F | 38  | 165905 | IR:IG            |
| 40  | 163487 | F | 40  | 163527 | IR:IG            |
| 40  | 163487 | F | 40  | 165946 | IR:IG            |
| 163 | 163496 | F | 163 | 165915 | IR:IG            |
| 228 | 163509 | F | 228 | 165928 | IR:IG            |
| 52  | 163536 | F | 52  | 165995 | IR:IG            |
| 52  | 163536 | F | 52  | 163576 | IR:IG            |
| 52  | 163576 | F | 52  | 165955 | IR:IG            |

|     |        |   |     |        |                  |
|-----|--------|---|-----|--------|------------------|
| 384 | 163589 | F | 384 | 166008 | IR:IG            |
| 313 | 163660 | F | 313 | 166079 | IR:IG            |
| 235 | 163738 | F | 235 | 166157 | <i>trnM</i> gene |
| 41  | 163932 | F | 41  | 166351 | IR:IG            |
| 41  | 163932 | F | 41  | 164096 | IR:IG            |
| 51  | 163997 | F | 51  | 166385 | IR:IG            |
| 53  | 164102 | F | 53  | 166357 | IR:IG            |
| 52  | 165955 | F | 52  | 165995 | IR:IG            |

*Passiflora deidamioides*

| Repeat Length 1 | Start Repeat 1 | Orientation | Repeat Length 2 | Start Repeat 2 | Location in cp genome |
|-----------------|----------------|-------------|-----------------|----------------|-----------------------|
| 30              | 226            | P           | 30              | 39335          | LSC:IG                |
| 41              | 780            | P           | 41              | 780            | LSC:IG                |
| 125             | 20352          | F           | 125             | 20420          | LSC:IG                |
| 65              | 20352          | F           | 65              | 20488          | LSC:IG                |
| 89              | 20388          | F           | 89              | 20456          | LSC:IG                |
| 48              | 20658          | F           | 48              | 20712          | LSC:IG                |
| 49              | 20658          | F           | 49              | 20685          | LSC:IG                |
| 61              | 20669          | F           | 61              | 20696          | LSC:IG                |
| 37              | 20669          | F           | 37              | 20723          | LSC:IG                |
| 34              | 20677          | F           | 34              | 20731          | LSC:IG                |
| 49              | 20681          | F           | 49              | 20708          | LSC:IG                |
| 81              | 32755          | F           | 81              | 34979          | <i>psaB</i> gene      |
| 41              | 32795          | F           | 41              | 35019          | <i>psaB</i> gene      |
| 40              | 36704          | F           | 40              | 36744          | LSC:IG                |
| 39              | 37967          | F           | 39              | 100551         | <i>ycf3</i> gene      |
| 39              | 37967          | P           | 39              | 149935         | <i>ycf3</i> gene      |
| 37              | 37967          | F           | 37              | 128913         | <i>ycf3</i> gene      |
| 33              | 39051          | P           | 33              | 39051          | LSC:IG                |
| 36              | 40420          | R           | 36              | 40431          | LSC:IG                |
| 37              | 40420          | P           | 37              | 40431          | LSC:IG                |
| 34              | 42295          | F           | 34              | 42306          | LSC:IG                |
| 43              | 42395          | F           | 43              | 42420          | LSC:IG                |
| 36              | 47929          | P           | 36              | 47929          | LSC:IG                |
| 84              | 51666          | F           | 84              | 51756          | <i>accD</i> gene      |
| 40              | 51666          | F           | 40              | 51720          | <i>accD</i> gene      |
| 79              | 51671          | F           | 79              | 51743          | <i>accD</i> gene      |
| 75              | 51671          | F           | 75              | 51797          | <i>accD</i> gene      |
| 53              | 51671          | F           | 53              | 51779          | <i>accD</i> gene      |
| 53              | 51671          | F           | 53              | 51815          | <i>accD</i> gene      |
| 44              | 51671          | F           | 44              | 51689          | <i>accD</i> gene      |
| 49              | 51679          | F           | 49              | 51823          | <i>accD</i> gene      |
| 45              | 51679          | F           | 45              | 51733          | <i>accD</i> gene      |

|    |       |   |    |       |                  |
|----|-------|---|----|-------|------------------|
| 89 | 51680 | F | 89 | 51770 | <i>accD</i> gene |
| 66 | 51680 | F | 66 | 51806 | <i>accD</i> gene |
| 62 | 51680 | F | 62 | 51788 | <i>accD</i> gene |
| 52 | 51680 | F | 52 | 51698 | <i>accD</i> gene |
| 34 | 51680 | F | 34 | 51716 | <i>accD</i> gene |
| 71 | 51689 | F | 71 | 51761 | <i>accD</i> gene |
| 44 | 51689 | F | 44 | 51725 | <i>accD</i> gene |
| 48 | 51698 | F | 48 | 51824 | <i>accD</i> gene |
| 52 | 51698 | F | 52 | 51734 | <i>accD</i> gene |
| 52 | 51698 | F | 52 | 51752 | <i>accD</i> gene |
| 43 | 51707 | F | 43 | 51761 | <i>accD</i> gene |
| 44 | 51716 | F | 44 | 51752 | <i>accD</i> gene |
| 57 | 51725 | F | 57 | 51815 | <i>accD</i> gene |
| 53 | 51725 | F | 53 | 51797 | <i>accD</i> gene |
| 53 | 51734 | F | 53 | 51770 | <i>accD</i> gene |
| 53 | 51734 | F | 53 | 51806 | <i>accD</i> gene |
| 62 | 51743 | F | 62 | 51761 | <i>accD</i> gene |
| 49 | 51751 | F | 49 | 51823 | <i>accD</i> gene |
| 84 | 51752 | F | 84 | 51788 | <i>accD</i> gene |
| 80 | 51752 | F | 80 | 51770 | <i>accD</i> gene |
| 53 | 51752 | F | 53 | 51806 | <i>accD</i> gene |
| 30 | 51752 | F | 30 | 51842 | <i>accD</i> gene |
| 80 | 51761 | F | 80 | 51779 | <i>accD</i> gene |
| 75 | 51761 | F | 75 | 51797 | <i>accD</i> gene |
| 57 | 51761 | F | 57 | 51815 | <i>accD</i> gene |
| 39 | 51761 | F | 39 | 51833 | <i>accD</i> gene |
| 48 | 51770 | F | 48 | 51824 | <i>accD</i> gene |
| 48 | 51788 | F | 48 | 51824 | <i>accD</i> gene |
| 44 | 51806 | F | 44 | 51824 | <i>accD</i> gene |
| 49 | 52034 | F | 49 | 52100 | <i>accD</i> gene |
| 38 | 52045 | F | 38 | 52111 | <i>accD</i> gene |
| 46 | 52054 | F | 46 | 52120 | <i>accD</i> gene |
| 32 | 52068 | F | 32 | 52224 | <i>accD</i> gene |
| 32 | 52068 | F | 32 | 52251 | <i>accD</i> gene |
| 50 | 52129 | F | 50 | 52237 | <i>accD</i> gene |
| 96 | 52134 | F | 96 | 52143 | <i>accD</i> gene |
| 87 | 52134 | F | 87 | 52152 | <i>accD</i> gene |
| 87 | 52134 | F | 87 | 52179 | <i>accD</i> gene |
| 78 | 52134 | F | 78 | 52161 | <i>accD</i> gene |
| 78 | 52134 | F | 78 | 52188 | <i>accD</i> gene |
| 69 | 52134 | F | 69 | 52197 | <i>accD</i> gene |
| 60 | 52134 | F | 60 | 52206 | <i>accD</i> gene |
| 51 | 52134 | F | 51 | 52215 | <i>accD</i> gene |
| 41 | 52134 | F | 41 | 52224 | <i>accD</i> gene |

|     |       |   |     |       |                  |
|-----|-------|---|-----|-------|------------------|
| 36  | 52134 | F | 36  | 52251 | <i>accD</i> gene |
| 90  | 52140 | F | 90  | 52176 | <i>accD</i> gene |
| 45  | 52143 | F | 45  | 52242 | <i>accD</i> gene |
| 111 | 52149 | F | 111 | 52176 | <i>accD</i> gene |
| 45  | 52152 | F | 45  | 52242 | <i>accD</i> gene |
| 81  | 52158 | F | 81  | 52176 | <i>accD</i> gene |
| 45  | 52161 | F | 45  | 52242 | <i>accD</i> gene |
| 72  | 52167 | F | 72  | 52176 | <i>accD</i> gene |
| 45  | 52170 | F | 45  | 52242 | <i>accD</i> gene |
| 84  | 52176 | F | 84  | 52203 | <i>accD</i> gene |
| 63  | 52176 | F | 63  | 52185 | <i>accD</i> gene |
| 63  | 52176 | F | 63  | 52194 | <i>accD</i> gene |
| 54  | 52176 | F | 54  | 52212 | <i>accD</i> gene |
| 45  | 52176 | F | 45  | 52221 | <i>accD</i> gene |
| 36  | 52176 | F | 36  | 52230 | <i>accD</i> gene |
| 45  | 52179 | F | 45  | 52242 | <i>accD</i> gene |
| 45  | 52188 | F | 45  | 52242 | <i>accD</i> gene |
| 42  | 52197 | F | 42  | 52242 | <i>accD</i> gene |
| 33  | 52206 | F | 33  | 52242 | <i>accD</i> gene |
| 55  | 52215 | F | 55  | 52242 | <i>accD</i> gene |
| 61  | 52486 | F | 61  | 52762 | <i>accD</i> gene |
| 49  | 52486 | F | 49  | 52738 | <i>accD</i> gene |
| 43  | 52486 | F | 43  | 52786 | <i>accD</i> gene |
| 37  | 52486 | F | 37  | 52510 | <i>accD</i> gene |
| 45  | 52490 | F | 45  | 52559 | <i>accD</i> gene |
| 33  | 52490 | F | 33  | 52544 | <i>accD</i> gene |
| 53  | 52491 | F | 53  | 52719 | <i>accD</i> gene |
| 50  | 52497 | F | 50  | 52749 | <i>accD</i> gene |
| 32  | 52497 | F | 32  | 52797 | <i>accD</i> gene |
| 44  | 52506 | F | 44  | 52560 | <i>accD</i> gene |
| 32  | 52506 | F | 32  | 52575 | <i>accD</i> gene |
| 39  | 52508 | R | 39  | 52790 | <i>accD</i> gene |
| 68  | 52512 | R | 68  | 52526 | <i>accD</i> gene |
| 63  | 52514 | F | 63  | 52529 | <i>accD</i> gene |
| 48  | 52514 | F | 48  | 52544 | <i>accD</i> gene |
| 33  | 52514 | R | 33  | 52514 | <i>accD</i> gene |
| 33  | 52514 | F | 33  | 52559 | <i>accD</i> gene |
| 36  | 52526 | R | 36  | 52568 | <i>accD</i> gene |
| 51  | 52529 | R | 51  | 52541 | <i>accD</i> gene |
| 38  | 52529 | R | 38  | 52785 | <i>accD</i> gene |
| 39  | 52529 | F | 39  | 52568 | <i>accD</i> gene |
| 33  | 52529 | F | 33  | 52790 | <i>accD</i> gene |
| 41  | 52536 | F | 41  | 52710 | <i>accD</i> gene |
| 38  | 52536 | F | 38  | 52665 | <i>accD</i> gene |



|     |       |   |     |       |                  |
|-----|-------|---|-----|-------|------------------|
| 38  | 52536 | F | 38  | 52680 | <i>accD</i> gene |
| 38  | 52536 | F | 38  | 52695 | <i>accD</i> gene |
| 41  | 52541 | R | 41  | 52563 | <i>accD</i> gene |
| 38  | 52544 | R | 38  | 52785 | <i>accD</i> gene |
| 36  | 52544 | R | 36  | 52556 | <i>accD</i> gene |
| 33  | 52544 | F | 33  | 52766 | <i>accD</i> gene |
| 33  | 52544 | F | 33  | 52790 | <i>accD</i> gene |
| 44  | 52545 | F | 44  | 52659 | <i>accD</i> gene |
| 44  | 52545 | F | 44  | 52674 | <i>accD</i> gene |
| 44  | 52545 | F | 44  | 52689 | <i>accD</i> gene |
| 56  | 52551 | F | 56  | 52710 | <i>accD</i> gene |
| 38  | 52551 | F | 38  | 52566 | <i>accD</i> gene |
| 38  | 52556 | R | 38  | 52566 | <i>accD</i> gene |
| 33  | 52556 | F | 33  | 52655 | <i>accD</i> gene |
| 45  | 52559 | F | 45  | 52766 | <i>accD</i> gene |
| 39  | 52559 | F | 39  | 52790 | <i>accD</i> gene |
| 47  | 52560 | F | 47  | 52719 | <i>accD</i> gene |
| 41  | 52566 | F | 41  | 52749 | <i>accD</i> gene |
| 33  | 52571 | R | 33  | 52571 | <i>accD</i> gene |
| 32  | 52575 | F | 32  | 52734 | <i>accD</i> gene |
| 35  | 52598 | F | 35  | 52823 | <i>accD</i> gene |
| 134 | 52599 | F | 134 | 52614 | <i>accD</i> gene |
| 53  | 52599 | F | 53  | 52629 | <i>accD</i> gene |
| 38  | 52599 | F | 38  | 52644 | <i>accD</i> gene |
| 34  | 52614 | F | 34  | 52824 | <i>accD</i> gene |
| 34  | 52629 | F | 34  | 52824 | <i>accD</i> gene |
| 78  | 52640 | F | 78  | 52670 | <i>accD</i> gene |
| 63  | 52640 | F | 63  | 52685 | <i>accD</i> gene |
| 48  | 52640 | F | 48  | 52700 | <i>accD</i> gene |
| 78  | 52655 | F | 78  | 52670 | <i>accD</i> gene |
| 63  | 52655 | F | 63  | 52685 | <i>accD</i> gene |
| 48  | 52655 | F | 48  | 52700 | <i>accD</i> gene |
| 33  | 52655 | F | 33  | 52715 | <i>accD</i> gene |
| 65  | 52719 | F | 65  | 52767 | <i>accD</i> gene |
| 41  | 52719 | F | 41  | 52791 | <i>accD</i> gene |
| 83  | 52725 | F | 83  | 52749 | <i>accD</i> gene |
| 59  | 52749 | F | 59  | 52773 | <i>accD</i> gene |
| 35  | 52773 | F | 35  | 52797 | <i>accD</i> gene |
| 41  | 52903 | R | 41  | 52903 | <i>accD</i> gene |
| 32  | 52903 | R | 32  | 52903 | <i>accD</i> gene |
| 40  | 52903 | R | 40  | 52913 | <i>accD</i> gene |
| 42  | 52904 | F | 42  | 52913 | <i>accD</i> gene |
| 33  | 52904 | F | 33  | 52922 | <i>accD</i> gene |
| 63  | 54123 | F | 63  | 62454 | LSC:IG:ACCD      |

|       |        |   |       |        |                  |
|-------|--------|---|-------|--------|------------------|
| 53    | 54133  | F | 53    | 62464  | LSC:IG:ACCD      |
| 42    | 54144  | F | 42    | 62475  | LSC:IG:ACCD      |
| 53    | 54153  | F | 53    | 62484  | LSC:IG:ACCD      |
| 31    | 63522  | F | 31    | 63588  | LSC:IG           |
| 46    | 65584  | F | 46    | 65617  | <i>clpP</i> gene |
| 36    | 65648  | F | 36    | 65657  | <i>clpP</i> gene |
| 37    | 74071  | F | 37    | 74107  | <i>rpoA</i> gene |
| 33    | 82411  | F | 33    | 89061  | LSC:IG           |
| 33    | 82411  | P | 33    | 161431 | LSC:IG           |
| 62    | 82486  | F | 62    | 88973  | LSC:IG           |
| 62    | 82486  | P | 62    | 161490 | LSC:IG           |
| 43    | 82493  | F | 43    | 89247  | LSC:IG           |
| 43    | 82493  | P | 43    | 161235 | LSC:IG           |
| 35819 | 82572  | P | 35819 | 132134 | IR               |
| 46    | 88980  | F | 46    | 89247  | <i>ycf2</i> gene |
| 46    | 88980  | P | 46    | 161232 | <i>ycf2</i> gene |
| 46    | 89247  | P | 46    | 161499 | <i>ycf2</i> gene |
| 36    | 89452  | F | 36    | 89470  | <i>ycf2</i> gene |
| 36    | 89452  | P | 36    | 161019 | <i>ycf2</i> gene |
| 36    | 89470  | P | 36    | 161037 | <i>ycf2</i> gene |
| 33    | 90967  | F | 33    | 90994  | <i>ycf2</i> gene |
| 33    | 90967  | P | 33    | 159498 | <i>ycf2</i> gene |
| 33    | 90994  | P | 33    | 159525 | <i>ycf2</i> gene |
| 48    | 91041  | F | 48    | 91086  | <i>ycf2</i> gene |
| 48    | 91041  | P | 48    | 159391 | <i>ycf2</i> gene |
| 42    | 91053  | F | 42    | 91098  | <i>ycf2</i> gene |
| 42    | 91053  | P | 42    | 159385 | <i>ycf2</i> gene |
| 33    | 91062  | F | 33    | 91107  | <i>ycf2</i> gene |
| 33    | 91062  | P | 33    | 159385 | <i>ycf2</i> gene |
| 48    | 91086  | P | 48    | 159436 | <i>ycf2</i> gene |
| 42    | 91098  | P | 42    | 159430 | <i>ycf2</i> gene |
| 33    | 91107  | P | 33    | 159430 | <i>ycf2</i> gene |
| 34    | 94875  | F | 34    | 94938  | <i>ycf2</i> gene |
| 34    | 94875  | P | 34    | 155553 | <i>ycf2</i> gene |
| 34    | 94938  | P | 34    | 155616 | <i>ycf2</i> gene |
| 49    | 96503  | P | 49    | 96503  | IR:IG            |
| 49    | 96503  | F | 49    | 153973 | IR:IG            |
| 39    | 100549 | F | 39    | 128911 | IR:IG            |
| 156   | 104218 | F | 156   | 104333 | IR:IG            |
| 156   | 104218 | P | 156   | 146036 | IR:IG            |
| 141   | 104218 | F | 141   | 104563 | IR:IG            |
| 141   | 104218 | P | 141   | 145821 | IR:IG            |
| 41    | 104218 | F | 41    | 104448 | IR:IG            |
| 41    | 104218 | P | 41    | 146036 | IR:IG            |

|     |        |   |     |        |       |
|-----|--------|---|-----|--------|-------|
| 352 | 104237 | F | 352 | 104352 | IR:IG |
| 352 | 104237 | P | 352 | 145821 | IR:IG |
| 237 | 104237 | F | 237 | 104467 | IR:IG |
| 237 | 104237 | P | 237 | 145821 | IR:IG |
| 122 | 104237 | F | 122 | 104582 | IR:IG |
| 122 | 104237 | P | 122 | 145821 | IR:IG |
| 120 | 104239 | F | 120 | 104644 | IR:IG |
| 120 | 104239 | P | 120 | 145761 | IR:IG |
| 91  | 104239 | F | 91  | 104704 | IR:IG |
| 91  | 104239 | P | 91  | 145730 | IR:IG |
| 60  | 104239 | F | 60  | 104299 | IR:IG |
| 60  | 104239 | F | 60  | 104414 | IR:IG |
| 60  | 104239 | F | 60  | 104529 | IR:IG |
| 60  | 104239 | P | 60  | 145936 | IR:IG |
| 60  | 104239 | P | 60  | 146051 | IR:IG |
| 60  | 104239 | P | 60  | 146166 | IR:IG |
| 31  | 104239 | F | 31  | 104764 | IR:IG |
| 31  | 104239 | P | 31  | 145730 | IR:IG |
| 344 | 104245 | F | 344 | 104360 | IR:IG |
| 344 | 104245 | P | 344 | 145821 | IR:IG |
| 229 | 104245 | F | 229 | 104475 | IR:IG |
| 229 | 104245 | P | 229 | 145821 | IR:IG |
| 114 | 104245 | F | 114 | 104590 | IR:IG |
| 114 | 104245 | P | 114 | 145821 | IR:IG |
| 214 | 104260 | F | 214 | 104490 | IR:IG |
| 214 | 104260 | P | 214 | 145821 | IR:IG |
| 60  | 104299 | F | 60  | 104354 | IR:IG |
| 60  | 104299 | F | 60  | 104584 | IR:IG |
| 60  | 104299 | P | 60  | 145881 | IR:IG |
| 60  | 104299 | P | 60  | 146111 | IR:IG |
| 60  | 104299 | F | 60  | 104469 | IR:IG |
| 60  | 104299 | P | 60  | 145996 | IR:IG |
| 60  | 104299 | P | 60  | 146226 | IR:IG |
| 39  | 104320 | F | 39  | 104490 | IR:IG |
| 39  | 104320 | P | 39  | 145996 | IR:IG |
| 156 | 104333 | P | 156 | 146151 | IR:IG |
| 352 | 104352 | P | 352 | 145936 | IR:IG |
| 120 | 104354 | F | 120 | 104644 | IR:IG |
| 120 | 104354 | P | 120 | 145761 | IR:IG |
| 91  | 104354 | F | 91  | 104704 | IR:IG |
| 91  | 104354 | P | 91  | 145730 | IR:IG |
| 60  | 104354 | F | 60  | 104414 | IR:IG |
| 60  | 104354 | F | 60  | 104529 | IR:IG |
| 60  | 104354 | P | 60  | 145936 | IR:IG |

|     |        |   |     |        |       |
|-----|--------|---|-----|--------|-------|
| 60  | 104354 | P | 60  | 146051 | IR:IG |
| 60  | 104354 | P | 60  | 146166 | IR:IG |
| 344 | 104360 | P | 344 | 145936 | IR:IG |
| 214 | 104375 | F | 214 | 104490 | IR:IG |
| 214 | 104375 | P | 214 | 145821 | IR:IG |
| 60  | 104414 | F | 60  | 104584 | IR:IG |
| 60  | 104414 | P | 60  | 145881 | IR:IG |
| 60  | 104414 | P | 60  | 146111 | IR:IG |
| 60  | 104414 | F | 60  | 104469 | IR:IG |
| 60  | 104414 | P | 60  | 145996 | IR:IG |
| 60  | 104414 | P | 60  | 146226 | IR:IG |
| 39  | 104435 | F | 39  | 104490 | IR:IG |
| 39  | 104435 | P | 39  | 145996 | IR:IG |
| 41  | 104448 | P | 41  | 146266 | IR:IG |
| 237 | 104467 | P | 237 | 146051 | IR:IG |
| 120 | 104469 | F | 120 | 104644 | IR:IG |
| 120 | 104469 | P | 120 | 145761 | IR:IG |
| 91  | 104469 | F | 91  | 104704 | IR:IG |
| 91  | 104469 | P | 91  | 145730 | IR:IG |
| 60  | 104469 | F | 60  | 104529 | IR:IG |
| 60  | 104469 | P | 60  | 145936 | IR:IG |
| 60  | 104469 | P | 60  | 146051 | IR:IG |
| 60  | 104469 | P | 60  | 146166 | IR:IG |
| 229 | 104475 | P | 229 | 146051 | IR:IG |
| 214 | 104490 | P | 214 | 146051 | IR:IG |
| 214 | 104490 | P | 214 | 145936 | IR:IG |
| 99  | 104490 | F | 99  | 104605 | IR:IG |
| 99  | 104490 | F | 99  | 104665 | IR:IG |
| 99  | 104490 | P | 99  | 145761 | IR:IG |
| 99  | 104490 | P | 99  | 145821 | IR:IG |
| 70  | 104490 | F | 70  | 104725 | IR:IG |
| 70  | 104490 | P | 70  | 145730 | IR:IG |
| 39  | 104490 | F | 39  | 104550 | IR:IG |
| 39  | 104490 | P | 39  | 145936 | IR:IG |
| 39  | 104490 | P | 39  | 146051 | IR:IG |
| 39  | 104490 | P | 39  | 146166 | IR:IG |
| 60  | 104529 | F | 60  | 104584 | IR:IG |
| 60  | 104529 | P | 60  | 145881 | IR:IG |
| 60  | 104529 | P | 60  | 146111 | IR:IG |
| 60  | 104529 | P | 60  | 145996 | IR:IG |
| 60  | 104529 | P | 60  | 146226 | IR:IG |
| 39  | 104550 | P | 39  | 145996 | IR:IG |
| 141 | 104563 | P | 141 | 146166 | IR:IG |
| 122 | 104582 | P | 122 | 146166 | IR:IG |

|     |        |   |     |        |       |
|-----|--------|---|-----|--------|-------|
| 151 | 104584 | F | 151 | 104644 | IR:IG |
| 151 | 104584 | P | 151 | 145730 | IR:IG |
| 91  | 104584 | F | 91  | 104704 | IR:IG |
| 91  | 104584 | P | 91  | 145730 | IR:IG |
| 60  | 104584 | P | 60  | 145936 | IR:IG |
| 60  | 104584 | P | 60  | 146051 | IR:IG |
| 60  | 104584 | P | 60  | 146166 | IR:IG |
| 114 | 104590 | P | 114 | 146166 | IR:IG |
| 99  | 104605 | P | 99  | 145936 | IR:IG |
| 151 | 104644 | P | 151 | 145790 | IR:IG |
| 120 | 104644 | P | 120 | 146051 | IR:IG |
| 120 | 104644 | P | 120 | 145936 | IR:IG |
| 120 | 104644 | P | 120 | 146166 | IR:IG |
| 99  | 104665 | P | 99  | 145936 | IR:IG |
| 91  | 104704 | P | 91  | 145850 | IR:IG |
| 91  | 104704 | P | 91  | 146080 | IR:IG |
| 91  | 104704 | P | 91  | 145965 | IR:IG |
| 91  | 104704 | P | 91  | 146195 | IR:IG |
| 70  | 104725 | P | 70  | 145965 | IR:IG |
| 31  | 104764 | P | 31  | 146255 | IR:IG |
| 56  | 111467 | F | 56  | 111489 | IR:IG |
| 56  | 111467 | P | 56  | 138980 | IR:IG |
| 34  | 111467 | F | 34  | 111511 | IR:IG |
| 34  | 111467 | P | 34  | 138980 | IR:IG |
| 56  | 111489 | P | 56  | 139002 | IR:IG |
| 34  | 111511 | P | 34  | 139024 | IR:IG |
| 72  | 111658 | F | 72  | 111736 | IR:IG |
| 72  | 111658 | P | 72  | 138717 | IR:IG |
| 72  | 111658 | F | 72  | 111697 | IR:IG |
| 72  | 111658 | P | 72  | 138756 | IR:IG |
| 42  | 111658 | F | 42  | 111775 | IR:IG |
| 42  | 111658 | P | 42  | 138708 | IR:IG |
| 33  | 111667 | F | 33  | 111835 | IR:IG |
| 33  | 111667 | P | 33  | 138657 | IR:IG |
| 83  | 111695 | F | 83  | 111734 | IR:IG |
| 83  | 111695 | P | 83  | 138708 | IR:IG |
| 72  | 111697 | P | 72  | 138795 | IR:IG |
| 33  | 111706 | F | 33  | 111835 | IR:IG |
| 33  | 111706 | P | 33  | 138657 | IR:IG |
| 83  | 111734 | P | 83  | 138747 | IR:IG |
| 44  | 111734 | F | 44  | 111773 | IR:IG |
| 44  | 111734 | P | 44  | 138708 | IR:IG |
| 72  | 111736 | P | 72  | 138795 | IR:IG |
| 33  | 111745 | F | 33  | 111835 | IR:IG |

|     |        |   |     |        |                  |
|-----|--------|---|-----|--------|------------------|
| 33  | 111745 | P | 33  | 138657 | IR:IG            |
| 44  | 111773 | P | 44  | 138747 | IR:IG            |
| 42  | 111775 | P | 42  | 138825 | IR:IG            |
| 62  | 111784 | F | 62  | 111835 | IR:IG            |
| 62  | 111784 | P | 62  | 138628 | IR:IG            |
| 62  | 111835 | P | 62  | 138679 | IR:IG            |
| 33  | 111835 | P | 33  | 138747 | IR:IG            |
| 33  | 111835 | P | 33  | 138825 | IR:IG            |
| 33  | 111835 | P | 33  | 138786 | IR:IG            |
| 47  | 115835 | F | 47  | 115874 | <i>ycfI</i> gene |
| 47  | 115835 | P | 47  | 134604 | <i>ycfI</i> gene |
| 47  | 115874 | P | 47  | 134643 | <i>ycfI</i> gene |
| 54  | 125473 | P | 54  | 125473 | SSC:IG           |
| 34  | 127583 | P | 34  | 127583 | SSC:IG           |
| 39  | 128911 | P | 39  | 149937 | <i>ndhA</i> gene |
| 47  | 134604 | F | 47  | 134643 | <i>ycfI</i> gene |
| 62  | 138628 | F | 62  | 138679 | IR:IG            |
| 33  | 138657 | F | 33  | 138747 | IR:IG            |
| 33  | 138657 | F | 33  | 138825 | IR:IG            |
| 33  | 138657 | F | 33  | 138786 | IR:IG            |
| 83  | 138708 | F | 83  | 138747 | IR:IG            |
| 42  | 138708 | F | 42  | 138825 | IR:IG            |
| 72  | 138717 | F | 72  | 138795 | IR:IG            |
| 72  | 138756 | F | 72  | 138795 | IR:IG            |
| 33  | 138795 | F | 33  | 138834 | IR:IG            |
| 56  | 138980 | F | 56  | 139002 | IR:IG            |
| 34  | 138980 | F | 34  | 139024 | IR:IG            |
| 151 | 145730 | F | 151 | 145790 | IR:IG            |
| 91  | 145730 | F | 91  | 145850 | IR:IG            |
| 91  | 145730 | F | 91  | 146080 | IR:IG            |
| 91  | 145730 | F | 91  | 145965 | IR:IG            |
| 91  | 145730 | F | 91  | 146195 | IR:IG            |
| 31  | 145730 | F | 31  | 146255 | IR:IG            |
| 70  | 145751 | F | 70  | 145871 | IR:IG            |
| 70  | 145751 | F | 70  | 146101 | IR:IG            |
| 70  | 145751 | F | 70  | 145986 | IR:IG            |
| 70  | 145751 | F | 70  | 146216 | IR:IG            |
| 125 | 145756 | F | 125 | 145816 | IR:IG            |
| 120 | 145761 | F | 120 | 146051 | IR:IG            |
| 120 | 145761 | F | 120 | 145936 | IR:IG            |
| 120 | 145761 | F | 120 | 146166 | IR:IG            |
| 352 | 145821 | F | 352 | 145936 | IR:IG            |
| 237 | 145821 | F | 237 | 146051 | IR:IG            |
| 141 | 145821 | F | 141 | 146166 | IR:IG            |

|     |        |   |     |        |                  |
|-----|--------|---|-----|--------|------------------|
| 60  | 145881 | F | 60  | 145936 | IR:IG            |
| 60  | 145881 | F | 60  | 146051 | IR:IG            |
| 60  | 145881 | F | 60  | 146166 | IR:IG            |
| 252 | 145921 | F | 252 | 146036 | IR:IG            |
| 60  | 145936 | F | 60  | 146111 | IR:IG            |
| 60  | 145936 | F | 60  | 145996 | IR:IG            |
| 60  | 145936 | F | 60  | 146226 | IR:IG            |
| 60  | 145996 | F | 60  | 146051 | IR:IG            |
| 60  | 145996 | F | 60  | 146166 | IR:IG            |
| 156 | 146036 | F | 156 | 146151 | IR:IG            |
| 41  | 146036 | F | 41  | 146266 | IR:IG            |
| 60  | 146051 | F | 60  | 146111 | IR:IG            |
| 60  | 146051 | F | 60  | 146226 | IR:IG            |
| 60  | 146111 | F | 60  | 146166 | IR:IG            |
| 60  | 146166 | F | 60  | 146226 | IR:IG            |
| 49  | 153973 | P | 49  | 153973 | IR:IG            |
| 34  | 155553 | F | 34  | 155616 | <i>ycf2</i> gene |
| 48  | 159391 | F | 48  | 159436 | <i>ycf2</i> gene |
| 33  | 159498 | F | 33  | 159525 | <i>ycf2</i> gene |
| 36  | 161019 | F | 36  | 161037 | <i>ycf2</i> gene |
| 46  | 161232 | F | 46  | 161499 | <i>ycf2</i> gene |

*Passiflora alata*

| Repeat Length 1 | Start Repeat 1 | Orientation | Repeat Length 2 | Start Repeat 2 | Location in cp genome |
|-----------------|----------------|-------------|-----------------|----------------|-----------------------|
| 56              | 7158           | F           | 56              | 7236           | LSC:IG                |
| 30              | 7493           | F           | 30              | 53912          | LSC:IG                |
| 47              | 8038           | P           | 47              | 8038           | LSC:IG                |
| 31              | 9123           | P           | 31              | 62870          | LSC:IG                |
| 31              | 9844           | F           | 31              | 9864           | LSC:IG                |
| 38              | 9905           | P           | 38              | 9905           | LSC:IG                |
| 35              | 9918           | F           | 35              | 9950           | LSC:IG                |
| 32              | 26844          | P           | 32              | 73318          | LSC:IG                |
| 30              | 26846          | P           | 30              | 73257          | LSC:IG                |
| 30              | 26946          | P           | 30              | 73374          | LSC:IG                |
| 33              | 27472          | F           | 33              | 27481          | <i>clpP</i> gene      |
| 33              | 27480          | F           | 33              | 27489          | <i>clpP</i> gene      |
| 30              | 27489          | F           | 30              | 27498          | <i>clpP</i> gene      |
| 44              | 30443          | F           | 44              | 38815          | LSC:IG                |
| 47              | 30486          | F           | 47              | 38859          | LSC:IG                |
| 31              | 30502          | F           | 31              | 38875          | LSC:IG                |
| 31              | 37246          | R           | 31              | 37246          | LSC:IG                |
| 30              | 40139          | F           | 30              | 40349          | <i>accD</i> gene      |
| 30              | 40158          | F           | 30              | 40353          | <i>accD</i> gene      |

|    |       |   |    |       |                  |
|----|-------|---|----|-------|------------------|
| 33 | 40179 | F | 33 | 40194 | <i>accD</i> gene |
| 33 | 40179 | F | 33 | 40254 | <i>accD</i> gene |
| 66 | 40184 | F | 66 | 40244 | <i>accD</i> gene |
| 32 | 40188 | F | 32 | 40203 | <i>accD</i> gene |
| 32 | 40188 | F | 32 | 40263 | <i>accD</i> gene |
| 33 | 40199 | F | 33 | 40244 | <i>accD</i> gene |
| 33 | 40218 | F | 33 | 40347 | <i>accD</i> gene |
| 33 | 40244 | F | 33 | 40259 | <i>accD</i> gene |
| 32 | 40278 | F | 32 | 40347 | <i>accD</i> gene |
| 33 | 40284 | F | 33 | 40314 | <i>accD</i> gene |
| 47 | 40285 | F | 47 | 40300 | <i>accD</i> gene |
| 32 | 40300 | F | 32 | 40315 | <i>accD</i> gene |
| 30 | 40314 | F | 30 | 40353 | <i>accD</i> gene |
| 52 | 40526 | F | 52 | 40658 | <i>accD</i> gene |
| 82 | 40559 | F | 82 | 40586 | <i>accD</i> gene |
| 55 | 40559 | F | 55 | 40613 | <i>accD</i> gene |
| 30 | 40559 | F | 30 | 40640 | <i>accD</i> gene |
| 74 | 40567 | F | 74 | 40594 | <i>accD</i> gene |
| 47 | 40567 | F | 47 | 40621 | <i>accD</i> gene |
| 61 | 40860 | F | 61 | 41004 | LSC:IG:ACCD      |
| 31 | 40864 | F | 31 | 41338 | LSC:IG:ACCD      |
| 46 | 40875 | F | 46 | 41019 | LSC:IG:ACCD      |
| 96 | 40895 | F | 96 | 41321 | LSC:IG:ACCD      |
| 36 | 40898 | F | 36 | 40994 | LSC:IG:ACCD      |
| 75 | 40902 | F | 75 | 40950 | LSC:IG:ACCD      |
| 41 | 40902 | F | 41 | 41376 | LSC:IG:ACCD      |
| 79 | 40912 | F | 79 | 41338 | LSC:IG:ACCD      |
| 65 | 40926 | F | 65 | 41352 | LSC:IG:ACCD      |
| 61 | 40930 | F | 61 | 40978 | LSC:IG:ACCD      |
| 70 | 40960 | F | 70 | 41338 | LSC:IG:ACCD      |
| 63 | 40978 | F | 63 | 41356 | LSC:IG:ACCD      |
| 32 | 40998 | F | 32 | 41328 | LSC:IG:ACCD      |
| 30 | 41063 | F | 30 | 41111 | LSC:IG:ACCD      |
| 49 | 41065 | F | 49 | 41089 | LSC:IG:ACCD      |
| 33 | 41124 | F | 33 | 41301 | LSC:IG:ACCD      |
| 31 | 41338 | F | 31 | 41386 | LSC:IG:ACCD      |
| 50 | 41715 | F | 50 | 41754 | LSC:IG:ACCD      |
| 62 | 45323 | P | 62 | 45323 | LSC:IG           |
| 31 | 47260 | F | 31 | 47305 | <i>atpB</i> gene |
| 35 | 47337 | R | 35 | 47337 | LSC:IG           |
| 31 | 50642 | F | 31 | 50672 | LSC:IG           |
| 30 | 50880 | F | 30 | 50909 | LSC:IG           |
| 30 | 50999 | P | 30 | 50999 | LSC:IG           |
| 33 | 54181 | P | 33 | 54181 | LSC:IG           |



|       |        |   |       |        |                  |
|-------|--------|---|-------|--------|------------------|
| 39    | 55257  | P | 39    | 94992  | <i>ycf3</i> gene |
| 39    | 55257  | P | 39    | 120283 | <i>ycf3</i> gene |
| 39    | 55257  | F | 39    | 138278 | <i>ycf3</i> gene |
| 32    | 56471  | R | 32    | 56471  | LSC:IG           |
| 31    | 56497  | R | 31    | 73815  | LSC:IG           |
| 34    | 56516  | F | 34    | 56537  | LSC:IG           |
| 32    | 56561  | P | 32    | 56561  | LSC:IG           |
| 32    | 56575  | P | 32    | 56575  | LSC:IG           |
| 57    | 56677  | F | 57    | 56697  | LSC:IG           |
| 41    | 56677  | F | 41    | 56717  | LSC:IG           |
| 43    | 56695  | F | 43    | 56715  | LSC:IG           |
| 79    | 58391  | F | 79    | 60615  | <i>psaA</i> gene |
| 67    | 58403  | F | 67    | 60627  | <i>psaA</i> gene |
| 39    | 58431  | F | 39    | 60655  | <i>psaA</i> gene |
| 30    | 62034  | F | 30    | 62056  | LSC:IG           |
| 30    | 68409  | F | 30    | 68428  | LSC:IG           |
| 48    | 68883  | P | 48    | 68883  | LSC:IG           |
| 33    | 72922  | F | 33    | 73047  | LSC:IG           |
| 56    | 73231  | F | 56    | 73292  | LSC:IG           |
| 44    | 75711  | P | 44    | 75711  | LSC:IG           |
| 24372 | 85536  | P | 24372 | 123401 | IR               |
| 35    | 86767  | F | 35    | 86785  | <i>rpl2</i> gene |
| 35    | 86767  | P | 35    | 146489 | <i>rpl2</i> gene |
| 35    | 86785  | P | 35    | 146507 | <i>rpl2</i> gene |
| 49    | 90950  | P | 49    | 90950  | IR:IG            |
| 49    | 90950  | F | 49    | 142310 | IR:IG            |
| 42    | 94990  | F | 42    | 120281 | IR:IG            |
| 123   | 106909 | F | 123   | 106972 | <i>ycf1</i> gene |
| 123   | 106909 | P | 123   | 126214 | <i>ycf1</i> gene |
| 60    | 106909 | F | 60    | 107035 | <i>ycf1</i> gene |
| 60    | 106909 | P | 60    | 126214 | <i>ycf1</i> gene |
| 123   | 106972 | P | 123   | 126277 | <i>ycf1</i> gene |
| 60    | 107035 | P | 60    | 126340 | <i>ycf1</i> gene |
| 32    | 108388 | F | 32    | 108559 | <i>ycf1</i> gene |
| 32    | 108388 | P | 32    | 124718 | <i>ycf1</i> gene |
| 31    | 108406 | F | 31    | 108424 | <i>ycf1</i> gene |
| 31    | 108406 | P | 31    | 124854 | <i>ycf1</i> gene |
| 31    | 108424 | P | 31    | 124872 | <i>ycf1</i> gene |
| 33    | 108551 | F | 33    | 108569 | <i>ycf1</i> gene |
| 33    | 108551 | P | 33    | 124707 | <i>ycf1</i> gene |
| 32    | 108559 | P | 32    | 124889 | <i>ycf1</i> gene |
| 33    | 108569 | P | 33    | 124725 | <i>ycf1</i> gene |
| 30    | 114640 | P | 30    | 114648 | SSC:IG           |
| 54    | 116832 | P | 54    | 116832 | SSC:IG           |

|     |        |   |     |        |                  |
|-----|--------|---|-----|--------|------------------|
| 42  | 120281 | P | 42  | 138277 | <i>ndhA</i> gene |
| 33  | 124707 | F | 33  | 124725 | <i>ycfI</i> gene |
| 32  | 124718 | F | 32  | 124889 | <i>ycfI</i> gene |
| 31  | 124854 | F | 31  | 124872 | <i>ycfI</i> gene |
| 123 | 126214 | F | 123 | 126277 | <i>ycfI</i> gene |
| 60  | 126214 | F | 60  | 126340 | <i>ycfI</i> gene |
| 49  | 142310 | P | 49  | 142310 | IR:IG            |
| 35  | 146489 | F | 35  | 146507 | <i>rpl2</i> gene |

*Passiflora cristalina*

| Repeat Length 1 | Start Repeat 1 | Orientation | Repeat Length 2 | Start Repeat 2 | Location in cp genome |
|-----------------|----------------|-------------|-----------------|----------------|-----------------------|
| 30              | 1627           | F           | 30              | 1654           | LSC:IG                |
| 32              | 4948           | F           | 32              | 4991           | LSC:IG                |
| 30              | 7467           | F           | 30              | 53927          | LSC:IG                |
| 47              | 8022           | P           | 47              | 8022           | LSC:IG                |
| 31              | 9105           | P           | 31              | 62794          | <i>trnG</i> gene      |
| 32              | 9894           | P           | 32              | 9894           | LSC:IG                |
| 30              | 26773          | P           | 30              | 73478          | LSC:IG                |
| 31              | 27413          | F           | 31              | 27440          | <i>clpP</i> gene      |
| 34              | 30366          | F           | 34              | 38782          | LSC:IG                |
| 47              | 30409          | F           | 47              | 38827          | LSC:IG                |
| 31              | 30425          | F           | 31              | 38843          | LSC:IG                |
| 32              | 31471          | F           | 32              | 31499          | LSC:IG                |
| 30              | 34111          | F           | 30              | 103031         | LSC:IG                |
| 30              | 34111          | P           | 30              | 127656         | LSC:IG                |
| 33              | 37196          | F           | 33              | 37210          | LSC:IG                |
| 31              | 37197          | R           | 31              | 37197          | LSC:IG                |
| 31              | 37197          | R           | 31              | 37211          | LSC:IG                |
| 33              | 40100          | F           | 33              | 40115          | <i>accD</i> gene      |
| 30              | 40115          | F           | 30              | 40244          | <i>accD</i> gene      |
| 32              | 40136          | F           | 32              | 40151          | <i>accD</i> gene      |
| 42              | 40196          | F           | 42              | 40220          | <i>accD</i> gene      |
| 37              | 40417          | F           | 37              | 40495          | <i>accD</i> gene      |
| 50              | 40446          | F           | 50              | 40515          | <i>accD</i> gene      |
| 34              | 40462          | F           | 34              | 40531          | <i>accD</i> gene      |
| 102             | 40715          | F           | 102             | 40763          | LSC:IG:ACCD           |
| 54              | 40715          | F           | 54              | 40811          | LSC:IG:ACCD           |
| 31              | 40846          | F           | 31              | 40918          | LSC:IG:ACCD           |
| 30              | 40861          | F           | 30              | 40885          | LSC:IG:ACCD           |
| 33              | 40898          | F           | 33              | 41153          | LSC:IG:ACCD           |
| 34              | 41265          | F           | 34              | 41280          | LSC:IG:ACCD           |
| 50              | 41612          | F           | 50              | 41651          | LSC:IG:ACCD           |
| 66              | 41726          | F           | 66              | 41770          | LSC:IG:ACCD           |

|     |       |   |     |        |                  |
|-----|-------|---|-----|--------|------------------|
| 57  | 41735 | F | 57  | 41779  | LSC:IG:ACCD      |
| 62  | 45273 | P | 62  | 45273  | LSC:IG           |
| 31  | 47210 | F | 31  | 47255  | <i>atpB</i> gene |
| 30  | 47739 | F | 30  | 47740  | LSC:IG           |
| 31  | 48193 | F | 31  | 48212  | LSC:IG           |
| 35  | 50872 | F | 35  | 50901  | LSC:IG           |
| 33  | 54196 | P | 33  | 54196  | LSC:IG           |
| 39  | 55271 | P | 39  | 93613  | <i>ycf3</i> gene |
| 39  | 55271 | P | 39  | 119007 | <i>ycf3</i> gene |
| 39  | 55271 | F | 39  | 137065 | <i>ycf3</i> gene |
| 30  | 56475 | R | 30  | 56475  | LSC:IG           |
| 32  | 56507 | R | 32  | 117668 | LSC:IG           |
| 30  | 56516 | P | 30  | 56516  | LSC:IG           |
| 79  | 58316 | F | 79  | 60540  | <i>psaA</i> gene |
| 67  | 58328 | F | 67  | 60552  | <i>psaA</i> gene |
| 39  | 58356 | F | 39  | 60580  | <i>psaA</i> gene |
| 30  | 61959 | F | 30  | 61981  | LSC:IG           |
| 30  | 62939 | F | 30  | 62964  | LSC:IG           |
| 36  | 72909 | F | 36  | 73039  | LSC:IG           |
| 36  | 72909 | F | 36  | 73133  | LSC:IG           |
| 32  | 72913 | F | 32  | 72990  | LSC:IG           |
| 32  | 72913 | F | 32  | 73207  | LSC:IG           |
| 50  | 72965 | F | 50  | 73182  | LSC:IG           |
| 59  | 72980 | F | 59  | 73197  | LSC:IG           |
| 70  | 72990 | F | 70  | 73137  | LSC:IG           |
| 49  | 72990 | F | 49  | 73043  | LSC:IG           |
| 57  | 73003 | F | 57  | 73150  | LSC:IG           |
| 36  | 73003 | F | 36  | 73056  | LSC:IG           |
| 36  | 73003 | F | 36  | 73220  | LSC:IG           |
| 83  | 73009 | F | 83  | 73103  | LSC:IG           |
| 30  | 73030 | F | 30  | 73177  | LSC:IG           |
| 49  | 73043 | F | 49  | 73207  | LSC:IG           |
| 32  | 73050 | F | 32  | 73091  | LSC:IG           |
| 30  | 73062 | F | 30  | 73103  | LSC:IG           |
| 30  | 73062 | F | 30  | 73226  | LSC:IG           |
| 42  | 73091 | F | 42  | 73214  | LSC:IG           |
| 32  | 73091 | F | 32  | 73144  | LSC:IG           |
| 32  | 73101 | F | 32  | 73224  | LSC:IG           |
| 51  | 73103 | F | 51  | 73156  | LSC:IG           |
| 30  | 73124 | F | 30  | 73177  | LSC:IG           |
| 49  | 73137 | F | 49  | 73207  | LSC:IG           |
| 30  | 73156 | F | 30  | 73226  | LSC:IG           |
| 119 | 73314 | F | 119 | 73387  | LSC:IG           |
| 46  | 73314 | F | 46  | 73460  | LSC:IG           |

|       |        |   |       |        |                  |
|-------|--------|---|-------|--------|------------------|
| 22931 | 85663  | P | 22931 | 122123 | IR               |
| 38    | 86926  | F | 38    | 86962  | <i>rpl2</i> gene |
| 38    | 86926  | P | 38    | 143717 | <i>rpl2</i> gene |
| 53    | 86929  | F | 53    | 86947  | <i>rpl2</i> gene |
| 53    | 86929  | P | 53    | 143717 | <i>rpl2</i> gene |
| 53    | 86947  | P | 53    | 143735 | <i>rpl2</i> gene |
| 35    | 86947  | F | 35    | 86965  | <i>rpl2</i> gene |
| 35    | 86947  | P | 35    | 143717 | <i>rpl2</i> gene |
| 38    | 86962  | P | 38    | 143753 | <i>rpl2</i> gene |
| 35    | 86965  | P | 35    | 143735 | <i>rpl2</i> gene |
| 49    | 89565  | P | 49    | 89565  | IR:IG            |
| 49    | 89565  | F | 49    | 141103 | IR:IG            |
| 42    | 93611  | F | 42    | 119005 | <i>rps7</i> gene |
| 35    | 103803 | F | 35    | 103843 | IR:IG            |
| 35    | 103803 | P | 35    | 126839 | IR:IG            |
| 32    | 103811 | F | 32    | 103880 | IR:IG            |
| 32    | 103811 | P | 32    | 126805 | IR:IG            |
| 35    | 103843 | P | 35    | 126879 | IR:IG            |
| 37    | 103851 | F | 37    | 103880 | IR:IG            |
| 37    | 103851 | P | 37    | 126800 | IR:IG            |
| 37    | 103880 | P | 37    | 126829 | IR:IG            |
| 32    | 103880 | P | 32    | 126874 | IR:IG            |
| 123   | 105585 | F | 123   | 105648 | <i>ycf1</i> gene |
| 123   | 105585 | P | 123   | 124946 | <i>ycf1</i> gene |
| 60    | 105585 | F | 60    | 105711 | <i>ycf1</i> gene |
| 60    | 105585 | P | 60    | 124946 | <i>ycf1</i> gene |
| 123   | 105648 | P | 123   | 125009 | <i>ycf1</i> gene |
| 60    | 105711 | P | 60    | 125072 | <i>ycf1</i> gene |
| 32    | 107064 | F | 32    | 107235 | <i>ycf1</i> gene |
| 32    | 107064 | P | 32    | 123450 | <i>ycf1</i> gene |
| 31    | 107082 | F | 31    | 107100 | <i>ycf1</i> gene |
| 31    | 107082 | P | 31    | 123586 | <i>ycf1</i> gene |
| 31    | 107100 | P | 31    | 123604 | <i>ycf1</i> gene |
| 33    | 107227 | F | 33    | 107245 | <i>ycf1</i> gene |
| 33    | 107227 | P | 33    | 123439 | <i>ycf1</i> gene |
| 32    | 107235 | P | 32    | 123621 | <i>ycf1</i> gene |
| 33    | 107245 | P | 33    | 123457 | <i>ycf1</i> gene |
| 30    | 108742 | F | 30    | 108763 | IR:IG            |
| 30    | 108837 | F | 30    | 108853 | IR:IG            |
| 54    | 115542 | P | 54    | 115542 | IR:IG            |
| 42    | 119005 | P | 42    | 137064 | <i>ndhA</i> gene |
| 33    | 123439 | F | 33    | 123457 | <i>ycf1</i> gene |
| 32    | 123450 | F | 32    | 123621 | <i>ycf1</i> gene |
| 31    | 123586 | F | 31    | 123604 | <i>ycf1</i> gene |

|     |        |   |     |        |                  |
|-----|--------|---|-----|--------|------------------|
| 123 | 124946 | F | 123 | 125009 | <i>ycf1</i> gene |
| 60  | 124946 | F | 60  | 125072 | <i>ycf1</i> gene |
| 37  | 126800 | F | 37  | 126829 | IR:IG            |
| 32  | 126805 | F | 32  | 126874 | IR:IG            |
| 35  | 126839 | F | 35  | 126879 | IR:IG            |
| 49  | 141103 | P | 49  | 141103 | IR:IG            |
| 53  | 143717 | F | 53  | 143735 | <i>rpl2</i> gene |
| 38  | 143717 | F | 38  | 143753 | <i>rpl2</i> gene |

*Passiflora edmundoi*

| Repeat Length 1 | Start Repeat 1 | Orientation | Repeat Length 2 | Start Repeat 2 | Location in cp genome |
|-----------------|----------------|-------------|-----------------|----------------|-----------------------|
| 32              | 4950           | F           | 32              | 5000           | LSC:IG                |
| 31              | 5343           | P           | 31              | 5343           | LSC:IG                |
| 30              | 6705           | F           | 30              | 53967          | LSC:IG                |
| 47              | 7255           | P           | 47              | 7255           | LSC:IG                |
| 31              | 8342           | P           | 31              | 62800          | <i>trnG</i> gene      |
| 42              | 8557           | F           | 42              | 8578           | LSC:IG                |
| 34              | 8565           | F           | 34              | 8586           | LSC:IG                |
| 30              | 12903          | F           | 30              | 12918          | LSC:IG                |
| 32              | 26621          | F           | 32              | 26696          | LSC:IG                |
| 39              | 26631          | P           | 39              | 73254          | LSC:IG                |
| 44              | 26640          | P           | 44              | 73240          | LSC:IG                |
| 32              | 26655          | P           | 32              | 73237          | LSC:IG                |
| 44              | 30226          | F           | 44              | 38567          | LSC:IG                |
| 33              | 37000          | F           | 33              | 37014          | LSC:IG                |
| 31              | 37001          | R           | 31              | 37001          | LSC:IG                |
| 31              | 37001          | R           | 31              | 37015          | LSC:IG                |
| 31              | 39902          | F           | 31              | 40310          | <i>accD</i> gene      |
| 31              | 39943          | F           | 31              | 40018          | <i>accD</i> gene      |
| 55              | 39946          | R           | 55              | 39963          | <i>accD</i> gene      |
| 54              | 39946          | F           | 54              | 39988          | <i>accD</i> gene      |
| 39              | 39946          | R           | 39              | 39946          | <i>accD</i> gene      |
| 30              | 39946          | R           | 30              | 39946          | <i>accD</i> gene      |
| 35              | 39947          | F           | 35              | 40169          | <i>accD</i> gene      |
| 45              | 39948          | R           | 45              | 40004          | <i>accD</i> gene      |
| 33              | 39949          | F           | 33              | 40213          | <i>accD</i> gene      |
| 44              | 39957          | R           | 44              | 40005          | <i>accD</i> gene      |
| 35              | 39961          | F           | 35              | 40003          | <i>accD</i> gene      |
| 31              | 39962          | R           | 31              | 39962          | <i>accD</i> gene      |
| 31              | 39962          | R           | 31              | 40004          | <i>accD</i> gene      |
| 30              | 39962          | F           | 30              | 39971          | <i>accD</i> gene      |
| 31              | 39962          | F           | 31              | 40013          | <i>accD</i> gene      |
| 30              | 39962          | F           | 30              | 40430          | <i>accD</i> gene      |

|     |       |   |     |       |                  |
|-----|-------|---|-----|-------|------------------|
| 31  | 39968 | R | 31  | 40424 | <i>accD</i> gene |
| 33  | 39970 | F | 33  | 40429 | <i>accD</i> gene |
| 45  | 39971 | F | 45  | 40004 | <i>accD</i> gene |
| 30  | 39971 | R | 30  | 39972 | <i>accD</i> gene |
| 30  | 39971 | R | 30  | 40014 | <i>accD</i> gene |
| 31  | 39980 | F | 31  | 40268 | <i>accD</i> gene |
| 31  | 39980 | F | 31  | 40292 | <i>accD</i> gene |
| 31  | 39989 | F | 31  | 40169 | <i>accD</i> gene |
| 45  | 39990 | R | 45  | 40004 | <i>accD</i> gene |
| 33  | 39991 | F | 33  | 40213 | <i>accD</i> gene |
| 34  | 39991 | F | 34  | 40255 | <i>accD</i> gene |
| 31  | 39994 | F | 31  | 40282 | <i>accD</i> gene |
| 31  | 40004 | F | 31  | 40013 | <i>accD</i> gene |
| 30  | 40004 | F | 30  | 40430 | <i>accD</i> gene |
| 31  | 40005 | R | 31  | 40429 | <i>accD</i> gene |
| 36  | 40006 | R | 36  | 40006 | <i>accD</i> gene |
| 35  | 40007 | F | 35  | 40424 | <i>accD</i> gene |
| 30  | 40012 | F | 30  | 40420 | <i>accD</i> gene |
| 30  | 40019 | R | 30  | 40170 | <i>accD</i> gene |
| 33  | 40025 | F | 33  | 40157 | <i>accD</i> gene |
| 30  | 40028 | F | 30  | 40202 | <i>accD</i> gene |
| 30  | 40028 | F | 30  | 40244 | <i>accD</i> gene |
| 39  | 40030 | F | 39  | 40099 | <i>accD</i> gene |
| 51  | 40036 | F | 51  | 40051 | <i>accD</i> gene |
| 36  | 40036 | F | 36  | 40066 | <i>accD</i> gene |
| 41  | 40046 | F | 41  | 40061 | <i>accD</i> gene |
| 33  | 40051 | F | 33  | 40105 | <i>accD</i> gene |
| 33  | 40066 | F | 33  | 40105 | <i>accD</i> gene |
| 32  | 40076 | F | 32  | 40115 | <i>accD</i> gene |
| 75  | 40163 | F | 75  | 40205 | <i>accD</i> gene |
| 33  | 40163 | F | 33  | 40247 | <i>accD</i> gene |
| 67  | 40171 | F | 67  | 40213 | <i>accD</i> gene |
| 50  | 40258 | F | 50  | 40282 | <i>accD</i> gene |
| 30  | 40258 | F | 30  | 40306 | <i>accD</i> gene |
| 49  | 40402 | F | 49  | 40411 | <i>accD</i> gene |
| 32  | 40410 | F | 32  | 40428 | <i>accD</i> gene |
| 32  | 40419 | F | 32  | 40428 | <i>accD</i> gene |
| 103 | 40498 | F | 103 | 40549 | <i>accD</i> gene |
| 52  | 40498 | F | 52  | 40600 | <i>accD</i> gene |
| 41  | 40509 | F | 41  | 40611 | <i>accD</i> gene |
| 41  | 40560 | F | 41  | 40611 | <i>accD</i> gene |
| 30  | 40808 | F | 30  | 41519 | LSC:IG:ACCD      |
| 30  | 40808 | F | 30  | 41567 | LSC:IG:ACCD      |
| 40  | 40831 | F | 40  | 40900 | LSC:IG:ACCD      |

|    |       |   |    |       |             |
|----|-------|---|----|-------|-------------|
| 31 | 40840 | F | 31 | 40909 | LSC:IG:ACCD |
| 32 | 40875 | F | 32 | 41469 | LSC:IG:ACCD |
| 37 | 40927 | F | 37 | 40996 | LSC:IG:ACCD |
| 37 | 40927 | F | 37 | 41404 | LSC:IG:ACCD |
| 30 | 40927 | F | 30 | 41350 | LSC:IG:ACCD |
| 33 | 40931 | F | 33 | 41054 | LSC:IG:ACCD |
| 33 | 40931 | F | 33 | 41456 | LSC:IG:ACCD |
| 31 | 40931 | F | 31 | 41204 | LSC:IG:ACCD |
| 30 | 40935 | F | 30 | 41106 | LSC:IG:ACCD |
| 30 | 40935 | F | 30 | 41412 | LSC:IG:ACCD |
| 63 | 40983 | F | 63 | 41391 | LSC:IG:ACCD |
| 42 | 40983 | F | 42 | 41337 | LSC:IG:ACCD |
| 49 | 41002 | F | 49 | 41206 | LSC:IG:ACCD |
| 49 | 41002 | F | 49 | 41410 | LSC:IG:ACCD |
| 38 | 41002 | F | 38 | 41056 | LSC:IG:ACCD |
| 37 | 41002 | F | 37 | 41458 | LSC:IG:ACCD |
| 38 | 41002 | F | 38 | 41254 | LSC:IG:ACCD |
| 33 | 41002 | F | 33 | 41356 | LSC:IG:ACCD |
| 39 | 41003 | F | 39 | 41105 | LSC:IG:ACCD |
| 43 | 41003 | F | 43 | 41153 | LSC:IG:ACCD |
| 34 | 41012 | F | 34 | 41264 | LSC:IG:ACCD |
| 53 | 41027 | F | 53 | 41177 | LSC:IG:ACCD |
| 46 | 41048 | F | 46 | 41198 | LSC:IG:ACCD |
| 51 | 41051 | F | 51 | 41249 | LSC:IG:ACCD |
| 42 | 41051 | F | 42 | 41453 | LSC:IG:ACCD |
| 43 | 41051 | F | 43 | 41147 | LSC:IG:ACCD |
| 63 | 41054 | F | 63 | 41408 | LSC:IG:ACCD |
| 35 | 41054 | F | 35 | 41354 | LSC:IG:ACCD |
| 87 | 41057 | F | 87 | 41105 | LSC:IG:ACCD |
| 45 | 41066 | F | 45 | 41264 | LSC:IG:ACCD |
| 60 | 41081 | F | 60 | 41435 | LSC:IG:ACCD |
| 36 | 41091 | F | 36 | 41343 | LSC:IG:ACCD |
| 54 | 41095 | F | 54 | 41143 | LSC:IG:ACCD |
| 46 | 41095 | F | 46 | 41449 | LSC:IG:ACCD |
| 36 | 41097 | F | 36 | 41247 | LSC:IG:ACCD |
| 71 | 41105 | F | 71 | 41411 | LSC:IG:ACCD |
| 47 | 41105 | F | 47 | 41207 | LSC:IG:ACCD |
| 36 | 41105 | F | 36 | 41459 | LSC:IG:ACCD |
| 36 | 41114 | F | 36 | 41264 | LSC:IG:ACCD |
| 52 | 41129 | F | 52 | 41435 | LSC:IG:ACCD |
| 30 | 41129 | F | 30 | 41231 | LSC:IG:ACCD |
| 31 | 41145 | F | 31 | 41247 | LSC:IG:ACCD |
| 50 | 41147 | F | 50 | 41201 | LSC:IG:ACCD |
| 48 | 41153 | F | 48 | 41411 | LSC:IG:ACCD |

|     |       |   |     |        |                  |
|-----|-------|---|-----|--------|------------------|
| 37  | 41153 | F | 37  | 41255  | LSC:IG:ACCD      |
| 36  | 41153 | F | 36  | 41459  | LSC:IG:ACCD      |
| 32  | 41153 | F | 32  | 41357  | LSC:IG:ACCD      |
| 43  | 41201 | F | 43  | 41249  | LSC:IG:ACCD      |
| 42  | 41201 | F | 42  | 41453  | LSC:IG:ACCD      |
| 57  | 41204 | F | 57  | 41408  | LSC:IG:ACCD      |
| 35  | 41204 | F | 35  | 41354  | LSC:IG:ACCD      |
| 36  | 41216 | F | 36  | 41264  | LSC:IG:ACCD      |
| 46  | 41231 | F | 46  | 41279  | LSC:IG:ACCD      |
| 31  | 41236 | F | 31  | 41440  | LSC:IG:ACCD      |
| 36  | 41247 | F | 36  | 41451  | LSC:IG:ACCD      |
| 30  | 41247 | F | 30  | 41295  | LSC:IG:ACCD      |
| 31  | 41252 | F | 31  | 41408  | LSC:IG:ACCD      |
| 36  | 41264 | F | 36  | 41420  | LSC:IG:ACCD      |
| 30  | 41264 | F | 30  | 41468  | LSC:IG:ACCD      |
| 30  | 41279 | F | 30  | 41435  | LSC:IG:ACCD      |
| 78  | 41301 | F | 78  | 41355  | LSC:IG:ACCD      |
| 84  | 41312 | F | 84  | 41366  | LSC:IG:ACCD      |
| 30  | 41312 | F | 30  | 41420  | LSC:IG:ACCD      |
| 32  | 41347 | F | 32  | 41449  | LSC:IG:ACCD      |
| 43  | 41404 | F | 43  | 41452  | LSC:IG:ACCD      |
| 89  | 41476 | F | 89  | 41524  | LSC:IG:ACCD      |
| 41  | 41476 | F | 41  | 41572  | LSC:IG:ACCD      |
| 62  | 45319 | P | 62  | 45319  | LSC:IG           |
| 42  | 47245 | F | 42  | 47290  | <i>atpB</i> gene |
| 31  | 47256 | F | 31  | 47301  | <i>atpB</i> gene |
| 30  | 47662 | F | 30  | 47687  | LSC:IG           |
| 44  | 47728 | F | 44  | 47750  | LSC:IG           |
| 33  | 54240 | P | 33  | 54240  | LSC:IG           |
| 39  | 55311 | P | 39  | 94573  | <i>ycf3</i> gene |
| 39  | 55311 | P | 39  | 117752 | <i>ycf3</i> gene |
| 39  | 55311 | F | 39  | 133693 | <i>ycf3</i> gene |
| 37  | 56655 | F | 37  | 56675  | LSC:IG           |
| 79  | 58343 | F | 79  | 60567  | <i>psaA</i> gene |
| 67  | 58355 | F | 67  | 60579  | <i>psaA</i> gene |
| 39  | 58383 | F | 39  | 60607  | <i>psaA</i> gene |
| 62  | 73104 | F | 62  | 73224  | LSC:IG           |
| 118 | 73108 | F | 118 | 73168  | LSC:IG           |
| 44  | 75652 | P | 44  | 75652  | LSC:IG           |
| 30  | 78316 | F | 30  | 112676 | LSC:IG           |
| 32  | 85533 | F | 32  | 85572  | LSC:IG           |
| 32  | 85533 | P | 32  | 142701 | LSC:IG           |
| 30  | 85542 | F | 30  | 85552  | LSC:IG           |
| 33  | 85544 | R | 33  | 85544  | LSC:IG           |



|       |        |   |       |        |                  |
|-------|--------|---|-------|--------|------------------|
| 33    | 85559  | F | 33    | 85581  | LSC:IG           |
| 33    | 85559  | P | 33    | 142691 | LSC:IG           |
| 21928 | 85568  | P | 21928 | 120809 | IR               |
| 35    | 86827  | F | 35    | 86845  | <i>rpl2</i> gene |
| 35    | 86827  | P | 35    | 141425 | <i>rpl2</i> gene |
| 35    | 86845  | P | 35    | 141443 | <i>rpl2</i> gene |
| 49    | 90524  | P | 49    | 90524  | IR:IG            |
| 49    | 90524  | F | 49    | 137732 | IR:IG            |
| 42    | 94571  | F | 42    | 117750 | IR:IG            |
| 30    | 95396  | F | 30    | 95406  | IR:IG            |
| 30    | 95396  | P | 30    | 132869 | IR:IG            |
| 30    | 95406  | P | 30    | 132879 | IR:IG            |
| 54    | 114253 | P | 54    | 114253 | SSC:IG           |
| 32    | 116200 | F | 32    | 116225 | SSC:IG           |
| 32    | 116409 | F | 32    | 116413 | SSC:IG           |
| 31    | 116412 | R | 31    | 116412 | SSC:IG           |
| 30    | 116441 | F | 30    | 116456 | SSC:IG           |
| 42    | 117750 | P | 42    | 133692 | <i>ndhA</i> gene |
| 30    | 132869 | F | 30    | 132879 | IR:IG            |
| 49    | 137732 | P | 49    | 137732 | IR:IG            |
| 35    | 141425 | F | 35    | 141443 | <i>rpl2</i> gene |

*Passiflora loefgrenii*

| Repeat Length 1 | Start Repeat 1 | Orientation | Repeat Length 2 | Start Repeat 2 | Location in cp genome |
|-----------------|----------------|-------------|-----------------|----------------|-----------------------|
| 63              | 4962           | F           | 63              | 4993           | LSC:IG                |
| 32              | 4962           | F           | 32              | 5024           | LSC:IG                |
| 30              | 7578           | F           | 30              | 54643          | LSC:IG                |
| 47              | 8141           | P           | 47              | 8141           | LSC:IG                |
| 31              | 9223           | P           | 31              | 63492          | <i>trnG</i> gene      |
| 30              | 13736          | F           | 30              | 13751          | LSC:IG                |
| 41              | 27228          | F           | 41              | 27272          | LSC:IG                |
| 38              | 27501          | F           | 38              | 27575          | LSC:IG                |
| 46              | 31157          | F           | 46              | 39488          | LSC:IG                |
| 31              | 31172          | F           | 31              | 39503          | LSC:IG                |
| 35              | 31820          | P           | 35              | 31820          | LSC:IG                |
| 31              | 37873          | R           | 31              | 37873          | LSC:IG                |
| 36              | 40752          | F           | 36              | 40773          | <i>accD</i> gene      |
| 31              | 40806          | F           | 31              | 40911          | <i>accD</i> gene      |
| 30              | 40806          | F           | 30              | 40839          | <i>accD</i> gene      |
| 36              | 40807          | F           | 36              | 41170          | <i>accD</i> gene      |
| 44              | 40825          | F           | 44              | 40897          | <i>accD</i> gene      |
| 31              | 40831          | F           | 31              | 41083          | <i>accD</i> gene      |
| 30              | 40839          | F           | 30              | 40848          | <i>accD</i> gene      |

|     |       |   |     |       |                  |
|-----|-------|---|-----|-------|------------------|
| 30  | 40849 | F | 30  | 40984 | <i>accD</i> gene |
| 63  | 40852 | F | 63  | 41119 | <i>accD</i> gene |
| 30  | 40854 | F | 30  | 40917 | <i>accD</i> gene |
| 30  | 40863 | F | 30  | 41097 | <i>accD</i> gene |
| 30  | 40863 | F | 30  | 40965 | <i>accD</i> gene |
| 30  | 40885 | F | 30  | 41152 | <i>accD</i> gene |
| 32  | 40888 | F | 32  | 40945 | <i>accD</i> gene |
| 32  | 40888 | F | 32  | 41194 | <i>accD</i> gene |
| 31  | 40903 | F | 31  | 41083 | <i>accD</i> gene |
| 31  | 40917 | F | 31  | 41121 | <i>accD</i> gene |
| 51  | 40930 | F | 51  | 41179 | <i>accD</i> gene |
| 38  | 40948 | F | 38  | 41158 | <i>accD</i> gene |
| 54  | 40960 | F | 54  | 41092 | <i>accD</i> gene |
| 30  | 40965 | F | 30  | 41130 | <i>accD</i> gene |
| 46  | 40968 | F | 46  | 41100 | <i>accD</i> gene |
| 31  | 40989 | F | 31  | 41052 | <i>accD</i> gene |
| 35  | 40993 | F | 35  | 41017 | <i>accD</i> gene |
| 44  | 40998 | F | 44  | 41037 | <i>accD</i> gene |
| 30  | 41022 | F | 30  | 41037 | <i>accD</i> gene |
| 32  | 41074 | F | 32  | 41314 | <i>accD</i> gene |
| 30  | 41097 | F | 30  | 41130 | <i>accD</i> gene |
| 33  | 41158 | F | 33  | 41197 | <i>accD</i> gene |
| 40  | 41295 | F | 40  | 41304 | <i>accD</i> gene |
| 31  | 41295 | F | 31  | 41313 | <i>accD</i> gene |
| 32  | 41303 | F | 32  | 41312 | <i>accD</i> gene |
| 103 | 41382 | F | 103 | 41433 | <i>accD</i> gene |
| 52  | 41382 | F | 52  | 41484 | <i>accD</i> gene |
| 31  | 41781 | F | 31  | 41850 | LSC:IG:ACCD      |
| 40  | 41802 | F | 40  | 41871 | LSC:IG:ACCD      |
| 39  | 41878 | F | 39  | 41932 | LSC:IG:ACCD      |
| 39  | 41878 | F | 39  | 41986 | LSC:IG:ACCD      |
| 39  | 41878 | F | 39  | 42250 | LSC:IG:ACCD      |
| 39  | 41878 | F | 39  | 42304 | LSC:IG:ACCD      |
| 31  | 41878 | F | 31  | 42142 | LSC:IG:ACCD      |
| 36  | 41888 | F | 36  | 42152 | LSC:IG:ACCD      |
| 34  | 41890 | F | 34  | 42208 | LSC:IG:ACCD      |
| 33  | 41891 | F | 33  | 42101 | LSC:IG:ACCD      |
| 137 | 41910 | F | 137 | 42228 | LSC:IG:ACCD      |
| 37  | 41910 | F | 37  | 42120 | LSC:IG:ACCD      |
| 31  | 41910 | F | 31  | 42066 | LSC:IG:ACCD      |
| 31  | 41910 | F | 31  | 42174 | LSC:IG:ACCD      |
| 50  | 41926 | F | 50  | 41980 | LSC:IG:ACCD      |
| 50  | 41926 | F | 50  | 42298 | LSC:IG:ACCD      |
| 45  | 41926 | F | 45  | 42136 | LSC:IG:ACCD      |

|     |       |   |     |        |                  |
|-----|-------|---|-----|--------|------------------|
| 117 | 41930 | F | 117 | 42248  | LSC:IG:ACCD      |
| 30  | 41942 | F | 30  | 42152  | LSC:IG:ACCD      |
| 54  | 41976 | F | 54  | 42240  | LSC:IG:ACCD      |
| 49  | 41976 | F | 49  | 42132  | LSC:IG:ACCD      |
| 46  | 41984 | F | 46  | 42248  | LSC:IG:ACCD      |
| 30  | 41996 | F | 30  | 42152  | LSC:IG:ACCD      |
| 97  | 42054 | F | 97  | 42162  | LSC:IG:ACCD      |
| 43  | 42054 | F | 43  | 42108  | LSC:IG:ACCD      |
| 41  | 42056 | F | 41  | 42218  | LSC:IG:ACCD      |
| 56  | 42101 | F | 56  | 42209  | LSC:IG:ACCD      |
| 47  | 42104 | F | 47  | 42158  | LSC:IG:ACCD      |
| 71  | 42110 | F | 71  | 42218  | LSC:IG:ACCD      |
| 49  | 42132 | F | 49  | 42294  | LSC:IG:ACCD      |
| 41  | 42140 | F | 41  | 42248  | LSC:IG:ACCD      |
| 30  | 42152 | F | 30  | 42260  | LSC:IG:ACCD      |
| 30  | 42152 | F | 30  | 42314  | LSC:IG:ACCD      |
| 47  | 42158 | F | 47  | 42212  | LSC:IG:ACCD      |
| 54  | 42240 | F | 54  | 42294  | LSC:IG:ACCD      |
| 46  | 42248 | F | 46  | 42302  | LSC:IG:ACCD      |
| 30  | 42641 | F | 30  | 42671  | LSC:IG:ACCD      |
| 62  | 46054 | P | 62  | 46054  | LSC:IG           |
| 31  | 47991 | F | 31  | 48036  | <i>atpB</i> gene |
| 31  | 51367 | P | 31  | 57152  | LSC:IG           |
| 32  | 53511 | P | 32  | 53511  | LSC:IG           |
| 33  | 54922 | P | 33  | 54922  | LSC:IG           |
| 39  | 55985 | P | 39  | 95305  | <i>ycf3</i> gene |
| 39  | 55985 | P | 39  | 120026 | <i>ycf3</i> gene |
| 39  | 55985 | F | 39  | 137564 | <i>ycf3</i> gene |
| 57  | 57322 | F | 57  | 57342  | LSC:IG           |
| 37  | 57322 | F | 37  | 57362  | LSC:IG           |
| 79  | 59040 | F | 79  | 61264  | <i>psaA</i> gene |
| 67  | 59052 | F | 67  | 61276  | <i>psaA</i> gene |
| 39  | 59080 | F | 39  | 61304  | <i>psaA</i> gene |
| 41  | 73646 | F | 41  | 73706  | LSC:IG           |
| 30  | 73659 | F | 30  | 73719  | LSC:IG           |
| 58  | 73896 | F | 58  | 74028  | LSC:IG           |
| 64  | 73897 | F | 64  | 73963  | LSC:IG           |
| 80  | 73940 | F | 80  | 74006  | LSC:IG           |
| 57  | 73963 | F | 57  | 74029  | LSC:IG           |
| 44  | 76447 | P | 44  | 76447  | LSC:IG           |
| 34  | 86166 | F | 34  | 86190  | LSC:IG           |
| 30  | 86315 | F | 30  | 86328  | LSC:IG           |
| 32  | 86317 | R | 32  | 86333  | LSC:IG           |
| 31  | 86317 | R | 31  | 86350  | LSC:IG           |

|       |        |   |       |        |                  |
|-------|--------|---|-------|--------|------------------|
| 23450 | 86371  | P | 23450 | 123087 | IR               |
| 32    | 86811  | C | 32    | 146072 | <i>rpl2</i> gene |
| 30    | 86814  | R | 30    | 86814  | <i>rpl2</i> gene |
| 30    | 86814  | C | 30    | 146064 | <i>rpl2</i> gene |
| 49    | 91256  | P | 49    | 91256  | IR:IG            |
| 49    | 91256  | F | 49    | 141603 | IR:IG            |
| 42    | 95303  | F | 42    | 120024 | IR:IG            |
| 33    | 108314 | F | 33    | 108347 | <i>ycf1</i> gene |
| 33    | 108314 | P | 33    | 124528 | <i>ycf1</i> gene |
| 33    | 108347 | P | 33    | 124561 | <i>ycf1</i> gene |
| 32    | 108392 | F | 32    | 108410 | <i>ycf1</i> gene |
| 32    | 108392 | P | 32    | 124466 | <i>ycf1</i> gene |
| 32    | 108410 | P | 32    | 124484 | <i>ycf1</i> gene |
| 30    | 109086 | F | 30    | 109110 | <i>ycf1</i> gene |
| 30    | 109086 | P | 30    | 123768 | <i>ycf1</i> gene |
| 30    | 109110 | P | 30    | 123792 | <i>ycf1</i> gene |
| 42    | 112280 | F | 42    | 112294 | SSC:IG           |
| 30    | 112280 | F | 30    | 112308 | SSC:IG           |
| 54    | 116604 | P | 54    | 116604 | SSC:IG           |
| 48    | 118708 | P | 48    | 118708 | SSC:IG           |
| 42    | 120024 | P | 42    | 137563 | <i>ndhA</i> gene |
| 30    | 123768 | F | 30    | 123792 | <i>ycf1</i> gene |
| 32    | 124466 | F | 32    | 124484 | <i>ycf1</i> gene |
| 33    | 124528 | F | 33    | 124561 | <i>ycf1</i> gene |
| 49    | 141603 | P | 49    | 141603 | IR:IG            |
| 30    | 146064 | R | 30    | 146064 | IR:IG            |

*Passiflora miniata*

| Repeat Length 1 | Start Repeat 1 | Orientation | Repeat Length 2 | Start Repeat 2 | Location in cp genome |
|-----------------|----------------|-------------|-----------------|----------------|-----------------------|
| 32              | 4975           | F           | 32              | 5018           | LSC:IG                |
| 30              | 7500           | F           | 30              | 54041          | LSC:IG                |
| 47              | 8044           | P           | 47              | 8044           | LSC:IG                |
| 31              | 9125           | P           | 31              | 62950          | LSC:IG                |
| 41              | 9831           | F           | 41              | 9855           | LSC:IG                |
| 69              | 9874           | F           | 69              | 9899           | LSC:IG                |
| 44              | 9874           | F           | 44              | 9924           | LSC:IG                |
| 31              | 9891           | F           | 31              | 9961           | LSC:IG                |
| 31              | 9916           | F           | 31              | 9961           | LSC:IG                |
| 31              | 9943           | F           | 31              | 9963           | LSC:IG                |
| 36              | 10006          | P           | 36              | 10006          | LSC:IG                |
| 34              | 12792          | P           | 34              | 12792          | LSC:IG                |
| 30              | 26893          | P           | 30              | 73510          | LSC:IG                |
| 31              | 26925          | P           | 31              | 73476          | LSC:IG                |

|    |       |   |    |       |                  |
|----|-------|---|----|-------|------------------|
| 30 | 26993 | P | 30 | 73758 | LSC:IG           |
| 33 | 27513 | F | 33 | 27522 | <i>clpP</i> gene |
| 33 | 27521 | F | 33 | 27530 | <i>clpP</i> gene |
| 30 | 27530 | F | 30 | 27539 | <i>clpP</i> gene |
| 35 | 30501 | F | 35 | 38873 | LSC:IG           |
| 47 | 30544 | F | 47 | 38918 | LSC:IG           |
| 31 | 30560 | F | 31 | 38934 | LSC:IG           |
| 33 | 37290 | F | 33 | 37304 | LSC:IG           |
| 31 | 37291 | R | 31 | 37291 | LSC:IG           |
| 31 | 37291 | R | 31 | 37305 | LSC:IG           |
| 30 | 40197 | F | 30 | 40446 | <i>accD</i> gene |
| 30 | 40197 | F | 30 | 40263 | <i>accD</i> gene |
| 33 | 40201 | F | 33 | 40216 | <i>accD</i> gene |
| 31 | 40201 | F | 31 | 40231 | <i>accD</i> gene |
| 30 | 40216 | F | 30 | 40450 | <i>accD</i> gene |
| 41 | 40237 | F | 41 | 40342 | <i>accD</i> gene |
| 41 | 40237 | F | 41 | 40387 | <i>accD</i> gene |
| 33 | 40237 | F | 33 | 40327 | <i>accD</i> gene |
| 33 | 40237 | F | 33 | 40312 | <i>accD</i> gene |
| 33 | 40237 | F | 33 | 40372 | <i>accD</i> gene |
| 36 | 40242 | F | 36 | 40287 | <i>accD</i> gene |
| 32 | 40246 | F | 32 | 40351 | <i>accD</i> gene |
| 32 | 40246 | F | 32 | 40396 | <i>accD</i> gene |
| 31 | 40263 | F | 31 | 40446 | <i>accD</i> gene |
| 63 | 40282 | F | 63 | 40312 | <i>accD</i> gene |
| 48 | 40282 | F | 48 | 40372 | <i>accD</i> gene |
| 84 | 40291 | F | 84 | 40351 | <i>accD</i> gene |
| 43 | 40291 | F | 43 | 40396 | <i>accD</i> gene |
| 39 | 40291 | F | 39 | 40336 | <i>accD</i> gene |
| 54 | 40306 | F | 54 | 40321 | <i>accD</i> gene |
| 39 | 40306 | F | 39 | 40381 | <i>accD</i> gene |
| 73 | 40321 | F | 73 | 40366 | <i>accD</i> gene |
| 54 | 40321 | F | 54 | 40336 | <i>accD</i> gene |
| 54 | 40321 | F | 54 | 40351 | <i>accD</i> gene |
| 43 | 40321 | F | 43 | 40396 | <i>accD</i> gene |
| 58 | 40336 | F | 58 | 40381 | <i>accD</i> gene |
| 39 | 40351 | F | 39 | 40381 | <i>accD</i> gene |
| 39 | 40366 | F | 39 | 40381 | <i>accD</i> gene |
| 39 | 40381 | F | 39 | 40396 | <i>accD</i> gene |
| 44 | 40619 | F | 44 | 40637 | <i>accD</i> gene |
| 40 | 40623 | F | 40 | 40761 | <i>accD</i> gene |
| 70 | 40641 | F | 70 | 40761 | <i>accD</i> gene |
| 73 | 40659 | F | 73 | 40710 | <i>accD</i> gene |
| 52 | 40710 | F | 52 | 40779 | <i>accD</i> gene |

|     |       |   |     |        |                  |
|-----|-------|---|-----|--------|------------------|
| 109 | 40981 | F | 109 | 41029  | LSC:IG:ACCD      |
| 61  | 40981 | F | 61  | 41077  | LSC:IG:ACCD      |
| 30  | 40987 | F | 30  | 41455  | LSC:IG:ACCD      |
| 38  | 41017 | F | 38  | 41437  | LSC:IG:ACCD      |
| 32  | 41033 | F | 32  | 41453  | LSC:IG:ACCD      |
| 38  | 41065 | F | 38  | 41437  | LSC:IG:ACCD      |
| 32  | 41081 | F | 32  | 41453  | LSC:IG:ACCD      |
| 33  | 41173 | F | 33  | 41416  | LSC:IG:ACCD      |
| 30  | 41464 | F | 30  | 41512  | LSC:IG:ACCD      |
| 99  | 41927 | F | 99  | 41952  | LSC:IG:ACCD      |
| 74  | 41927 | F | 74  | 41977  | LSC:IG:ACCD      |
| 49  | 41927 | F | 49  | 42002  | LSC:IG:ACCD      |
| 62  | 45481 | P | 62  | 45481  | LSC:IG           |
| 31  | 47418 | F | 31  | 47463  | <i>atpB</i> gene |
| 30  | 51011 | F | 30  | 51040  | LSC:IG           |
| 33  | 54310 | P | 33  | 54310  | LSC:IG           |
| 39  | 55393 | P | 39  | 97173  | <i>ycf3</i> gene |
| 39  | 55393 | P | 39  | 122510 | <i>ycf3</i> gene |
| 39  | 55393 | F | 39  | 140572 | <i>ycf3</i> gene |
| 30  | 56605 | F | 30  | 56622  | LSC:IG           |
| 32  | 56631 | R | 32  | 56631  | LSC:IG           |
| 30  | 56703 | P | 30  | 56703  | LSC:IG           |
| 79  | 58472 | F | 79  | 60696  | <i>psaA</i> gene |
| 67  | 58484 | F | 67  | 60708  | <i>psaA</i> gene |
| 39  | 58512 | F | 39  | 60736  | <i>psaA</i> gene |
| 30  | 62115 | F | 30  | 62137  | LSC:IG           |
| 30  | 68487 | F | 30  | 68506  | LSC:IG           |
| 69  | 72940 | F | 69  | 72986  | LSC:IG           |
| 36  | 72940 | F | 36  | 73086  | LSC:IG           |
| 36  | 72940 | F | 36  | 73143  | LSC:IG           |
| 58  | 72951 | F | 58  | 72997  | LSC:IG           |
| 40  | 72982 | F | 40  | 73082  | LSC:IG           |
| 33  | 72982 | F | 33  | 73139  | LSC:IG           |
| 30  | 73028 | F | 30  | 73082  | LSC:IG           |
| 30  | 73028 | F | 30  | 73139  | LSC:IG           |
| 30  | 73049 | F | 30  | 73244  | LSC:IG           |
| 33  | 73053 | F | 33  | 73300  | LSC:IG           |
| 62  | 73077 | F | 62  | 73134  | LSC:IG           |
| 42  | 73097 | F | 42  | 73195  | LSC:IG           |
| 35  | 73104 | F | 35  | 73254  | LSC:IG           |
| 30  | 73109 | F | 30  | 73207  | LSC:IG           |
| 42  | 73154 | F | 42  | 73195  | LSC:IG           |
| 35  | 73161 | F | 35  | 73254  | LSC:IG           |
| 30  | 73166 | F | 30  | 73207  | LSC:IG           |

|       |        |   |       |        |                  |
|-------|--------|---|-------|--------|------------------|
| 72    | 73202  | F | 72    | 73254  | LSC:IG           |
| 101   | 73500  | F | 101   | 73561  | LSC:IG           |
| 40    | 73500  | F | 40    | 73622  | LSC:IG           |
| 30    | 73508  | F | 30    | 73700  | LSC:IG           |
| 116   | 73512  | F | 116   | 73573  | LSC:IG           |
| 55    | 73512  | F | 55    | 73634  | LSC:IG           |
| 26290 | 85864  | P | 26290 | 125630 | IR               |
| 35    | 87083  | F | 35    | 87101  | <i>rpl2</i> gene |
| 35    | 87083  | P | 35    | 150648 | <i>rpl2</i> gene |
| 35    | 87101  | P | 35    | 150666 | <i>rpl2</i> gene |
| 49    | 93131  | P | 49    | 93131  | IR:IG            |
| 49    | 93131  | F | 49    | 144604 | IR:IG            |
| 42    | 97171  | F | 42    | 122508 | IR:IG            |
| 57    | 107330 | F | 57    | 107416 | IR:IG            |
| 57    | 107330 | P | 57    | 130311 | IR:IG            |
| 30    | 107357 | F | 30    | 107483 | IR:IG            |
| 30    | 107357 | P | 30    | 130271 | IR:IG            |
| 57    | 107416 | P | 57    | 130397 | IR:IG            |
| 35    | 107443 | F | 35    | 107483 | IR:IG            |
| 35    | 107443 | P | 35    | 130266 | IR:IG            |
| 35    | 107483 | P | 35    | 130306 | IR:IG            |
| 30    | 107483 | P | 30    | 130397 | IR:IG            |
| 60    | 109202 | F | 60    | 109265 | <i>ycf1</i> gene |
| 60    | 109202 | P | 60    | 128459 | <i>ycf1</i> gene |
| 60    | 109265 | P | 60    | 128522 | <i>ycf1</i> gene |
| 32    | 110618 | F | 32    | 110789 | <i>ycf1</i> gene |
| 32    | 110618 | P | 32    | 126963 | <i>ycf1</i> gene |
| 31    | 110636 | F | 31    | 110654 | <i>ycf1</i> gene |
| 31    | 110636 | P | 31    | 127099 | <i>ycf1</i> gene |
| 31    | 110654 | P | 31    | 127117 | <i>ycf1</i> gene |
| 33    | 110781 | F | 33    | 110799 | <i>ycf1</i> gene |
| 33    | 110781 | P | 33    | 126952 | <i>ycf1</i> gene |
| 32    | 110789 | P | 32    | 127134 | <i>ycf1</i> gene |
| 33    | 110799 | P | 33    | 126970 | <i>ycf1</i> gene |
| 30    | 111487 | F | 30    | 111511 | <i>ycf1</i> gene |
| 30    | 111487 | P | 30    | 126243 | <i>ycf1</i> gene |
| 30    | 111511 | P | 30    | 126267 | <i>ycf1</i> gene |
| 54    | 119064 | P | 54    | 119064 | SSC:IG           |
| 42    | 122508 | P | 42    | 140571 | <i>ndhA</i> gene |
| 30    | 126243 | F | 30    | 126267 | <i>ycf1</i> gene |
| 33    | 126952 | F | 33    | 126970 | <i>ycf1</i> gene |
| 32    | 126963 | F | 32    | 127134 | <i>ycf1</i> gene |
| 31    | 127099 | F | 31    | 127117 | <i>ycf1</i> gene |
| 60    | 128459 | F | 60    | 128522 | <i>ycf1</i> gene |

|    |        |   |    |        |                  |
|----|--------|---|----|--------|------------------|
| 35 | 130266 | F | 35 | 130306 | IR:IG            |
| 30 | 130271 | F | 30 | 130397 | IR:IG            |
| 57 | 130311 | F | 57 | 130397 | IR:IG            |
| 45 | 130323 | F | 45 | 130409 | IR:IG            |
| 49 | 144604 | P | 49 | 144604 | IR:IG            |
| 35 | 150648 | F | 35 | 150666 | <i>rpl2 gene</i> |

***Passiflora mucronata***

| <b>Repeat Length 1</b> | <b>Start Repeat 1</b> | <b>Orientation</b> | <b>Repeat Length 2</b> | <b>Start Repeat 2</b> | <b>Location in cp genome</b> |
|------------------------|-----------------------|--------------------|------------------------|-----------------------|------------------------------|
| 30                     | 6853                  | F                  | 30                     | 53207                 | LSC:IG                       |
| 31                     | 8489                  | P                  | 31                     | 62087                 | LSC:IG                       |
| 55                     | 8593                  | P                  | 55                     | 8593                  | LSC:IG                       |
| 37                     | 9235                  | P                  | 37                     | 120126                | LSC:IG                       |
| 31                     | 9235                  | F                  | 31                     | 9241                  | LSC:IG                       |
| 34                     | 9238                  | P                  | 34                     | 120132                | LSC:IG                       |
| 30                     | 9238                  | F                  | 30                     | 120124                | LSC:IG                       |
| 30                     | 9238                  | P                  | 30                     | 120126                | LSC:IG                       |
| 32                     | 9240                  | F                  | 32                     | 120122                | LSC:IG                       |
| 30                     | 9240                  | F                  | 30                     | 9242                  | LSC:IG                       |
| 31                     | 9241                  | F                  | 31                     | 120121                | LSC:IG                       |
| 30                     | 9242                  | P                  | 30                     | 120128                | LSC:IG                       |
| 30                     | 9242                  | C                  | 30                     | 120117                | LSC:IG                       |
| 30                     | 9242                  | C                  | 30                     | 120119                | LSC:IG                       |
| 30                     | 9243                  | P                  | 30                     | 9243                  | LSC:IG                       |
| 30                     | 9246                  | C                  | 30                     | 9247                  | LSC:IG                       |
| 30                     | 9246                  | R                  | 30                     | 120117                | LSC:IG                       |
| 107                    | 26596                 | F                  | 107                    | 26671                 | LSC:IG                       |
| 32                     | 26596                 | F                  | 32                     | 26746                 | LSC:IG                       |
| 31                     | 26604                 | F                  | 31                     | 26754                 | LSC:IG                       |
| 32                     | 26606                 | P                  | 32                     | 72639                 | LSC:IG                       |
| 30                     | 26615                 | P                  | 30                     | 72248                 | LSC:IG                       |
| 30                     | 26615                 | P                  | 30                     | 72312                 | LSC:IG                       |
| 30                     | 26615                 | P                  | 30                     | 72376                 | LSC:IG                       |
| 30                     | 26615                 | P                  | 30                     | 72440                 | LSC:IG                       |
| 30                     | 26615                 | P                  | 30                     | 72504                 | LSC:IG                       |
| 30                     | 26615                 | P                  | 30                     | 72568                 | LSC:IG                       |
| 30                     | 26615                 | P                  | 30                     | 72632                 | LSC:IG                       |
| 31                     | 26679                 | F                  | 31                     | 26754                 | LSC:IG                       |
| 32                     | 26681                 | P                  | 32                     | 72639                 | LSC:IG                       |
| 30                     | 26690                 | P                  | 30                     | 72248                 | LSC:IG                       |
| 30                     | 26690                 | P                  | 30                     | 72312                 | LSC:IG                       |
| 30                     | 26690                 | P                  | 30                     | 72376                 | LSC:IG                       |
| 30                     | 26690                 | P                  | 30                     | 72440                 | LSC:IG                       |



|    |       |   |    |       |                  |
|----|-------|---|----|-------|------------------|
| 30 | 26690 | P | 30 | 72504 | LSC:IG           |
| 30 | 26690 | P | 30 | 72568 | LSC:IG           |
| 30 | 26690 | P | 30 | 72632 | LSC:IG           |
| 44 | 30231 | F | 44 | 38497 | LSC:IG           |
| 47 | 30274 | F | 47 | 38541 | LSC:IG           |
| 31 | 30290 | F | 31 | 38557 | LSC:IG           |
| 32 | 30958 | R | 32 | 30958 | LSC:IG           |
| 31 | 36941 | R | 31 | 36941 | LSC:IG           |
| 56 | 39873 | F | 56 | 39948 | <i>accD</i> gene |
| 46 | 39873 | F | 46 | 40062 | <i>accD</i> gene |
| 41 | 39873 | F | 41 | 39906 | <i>accD</i> gene |
| 37 | 39877 | F | 37 | 40015 | <i>accD</i> gene |
| 44 | 39885 | F | 44 | 39960 | <i>accD</i> gene |
| 30 | 39885 | F | 30 | 39918 | <i>accD</i> gene |
| 58 | 39889 | F | 58 | 39931 | <i>accD</i> gene |
| 58 | 39889 | F | 58 | 40045 | <i>accD</i> gene |
| 30 | 39889 | R | 30 | 40028 | <i>accD</i> gene |
| 30 | 39889 | F | 30 | 40036 | <i>accD</i> gene |
| 30 | 39889 | R | 30 | 40037 | <i>accD</i> gene |
| 54 | 39900 | F | 54 | 40056 | <i>accD</i> gene |
| 30 | 39900 | F | 30 | 39975 | <i>accD</i> gene |
| 46 | 39910 | F | 46 | 40015 | <i>accD</i> gene |
| 38 | 39918 | F | 38 | 40023 | <i>accD</i> gene |
| 36 | 39918 | F | 36 | 40074 | <i>accD</i> gene |
| 72 | 39922 | F | 72 | 40036 | <i>accD</i> gene |
| 34 | 39922 | R | 34 | 40033 | <i>accD</i> gene |
| 31 | 39922 | R | 31 | 40027 | <i>accD</i> gene |
| 31 | 39922 | R | 31 | 39922 | <i>accD</i> gene |
| 31 | 39922 | R | 31 | 40078 | <i>accD</i> gene |
| 30 | 39923 | R | 30 | 39964 | <i>accD</i> gene |
| 33 | 39928 | R | 33 | 40037 | <i>accD</i> gene |
| 40 | 39931 | F | 40 | 39964 | <i>accD</i> gene |
| 30 | 39931 | F | 30 | 40078 | <i>accD</i> gene |
| 30 | 39931 | F | 30 | 40027 | <i>accD</i> gene |
| 48 | 39942 | F | 48 | 40056 | <i>accD</i> gene |
| 30 | 39942 | F | 30 | 39975 | <i>accD</i> gene |
| 37 | 39952 | F | 37 | 40015 | <i>accD</i> gene |
| 30 | 39960 | F | 30 | 40074 | <i>accD</i> gene |
| 34 | 39960 | F | 34 | 40023 | <i>accD</i> gene |
| 40 | 39964 | F | 40 | 40045 | <i>accD</i> gene |
| 30 | 39964 | R | 30 | 40028 | <i>accD</i> gene |
| 30 | 39964 | F | 30 | 40036 | <i>accD</i> gene |
| 30 | 39964 | R | 30 | 40037 | <i>accD</i> gene |
| 30 | 39964 | R | 30 | 40079 | <i>accD</i> gene |

|    |       |   |    |        |                  |
|----|-------|---|----|--------|------------------|
| 44 | 40015 | F | 44 | 40066  | <i>accD</i> gene |
| 40 | 40027 | R | 40 | 40027  | <i>accD</i> gene |
| 34 | 40027 | F | 34 | 40036  | <i>accD</i> gene |
| 31 | 40027 | R | 31 | 40027  | <i>accD</i> gene |
| 31 | 40027 | R | 31 | 40078  | <i>accD</i> gene |
| 30 | 40027 | F | 30 | 40045  | <i>accD</i> gene |
| 37 | 40033 | R | 37 | 40033  | <i>accD</i> gene |
| 32 | 40035 | R | 32 | 40078  | <i>accD</i> gene |
| 32 | 40036 | F | 32 | 40078  | <i>accD</i> gene |
| 30 | 40045 | F | 30 | 40078  | <i>accD</i> gene |
| 31 | 40078 | R | 31 | 40078  | <i>accD</i> gene |
| 30 | 40081 | F | 30 | 40180  | <i>accD</i> gene |
| 30 | 40167 | F | 30 | 40176  | <i>accD</i> gene |
| 52 | 40260 | F | 52 | 40398  | <i>accD</i> gene |
| 53 | 40260 | F | 53 | 40347  | <i>accD</i> gene |
| 40 | 40272 | F | 40 | 40410  | <i>accD</i> gene |
| 41 | 40272 | F | 41 | 40359  | <i>accD</i> gene |
| 35 | 40278 | F | 35 | 40314  | <i>accD</i> gene |
| 85 | 40314 | F | 85 | 40365  | <i>accD</i> gene |
| 34 | 40314 | F | 34 | 40416  | <i>accD</i> gene |
| 30 | 40598 | F | 30 | 40817  | LSC:IG:ACCD      |
| 30 | 40598 | F | 30 | 40871  | LSC:IG:ACCD      |
| 31 | 40689 | F | 31 | 40758  | LSC:IG:ACCD      |
| 73 | 40806 | F | 73 | 40860  | LSC:IG:ACCD      |
| 97 | 40931 | F | 97 | 40970  | LSC:IG:ACCD      |
| 58 | 40931 | F | 58 | 41009  | LSC:IG:ACCD      |
| 30 | 41094 | F | 30 | 41118  | LSC:IG:ACCD      |
| 35 | 41101 | F | 35 | 41113  | LSC:IG:ACCD      |
| 66 | 41188 | F | 66 | 41254  | LSC:IG:ACCD      |
| 62 | 44630 | P | 62 | 44630  | LSC:IG           |
| 42 | 46556 | F | 42 | 46601  | <i>atpB</i> gene |
| 31 | 46567 | F | 31 | 46612  | <i>atpB</i> gene |
| 30 | 50158 | F | 30 | 50187  | LSC:IG           |
| 33 | 53486 | P | 33 | 53486  | <i>ycf3</i> gene |
| 39 | 54556 | P | 39 | 93785  | <i>ycf3</i> gene |
| 39 | 54556 | P | 39 | 121492 | <i>ycf3</i> gene |
| 39 | 54556 | F | 39 | 141855 | <i>ycf3</i> gene |
| 36 | 55837 | P | 36 | 55837  | LSC:IG           |
| 35 | 55839 | C | 35 | 55840  | LSC:IG           |
| 31 | 55839 | R | 31 | 55839  | LSC:IG           |
| 31 | 55840 | R | 31 | 55840  | LSC:IG           |
| 30 | 56028 | F | 30 | 56052  | LSC:IG           |
| 34 | 56507 | F | 34 | 56548  | LSC:IG           |
| 79 | 57635 | F | 79 | 59859  | <i>psaA</i> gene |

|       |        |   |       |        |                  |
|-------|--------|---|-------|--------|------------------|
| 67    | 57647  | F | 67    | 59871  | <i>psaA</i> gene |
| 39    | 57675  | F | 39    | 59899  | <i>psaA</i> gene |
| 30    | 66465  | F | 30    | 66493  | LSC:IG           |
| 57    | 72223  | F | 57    | 72607  | LSC:IG           |
| 372   | 72228  | F | 372   | 72292  | LSC:IG           |
| 308   | 72228  | F | 308   | 72356  | LSC:IG           |
| 244   | 72228  | F | 244   | 72420  | LSC:IG           |
| 180   | 72228  | F | 180   | 72484  | LSC:IG           |
| 116   | 72228  | F | 116   | 72548  | LSC:IG           |
| 44    | 75026  | P | 44    | 75026  | LSC:IG           |
| 26224 | 84840  | P | 26224 | 124615 | IR               |
| 35    | 86083  | F | 35    | 86101  | <i>rpl2</i> gene |
| 35    | 86083  | P | 35    | 149543 | <i>rpl2</i> gene |
| 35    | 86101  | P | 35    | 149561 | <i>rpl2</i> gene |
| 49    | 89736  | P | 49    | 89736  | IR:IG            |
| 49    | 89736  | F | 49    | 145894 | IR:IG            |
| 42    | 93783  | F | 42    | 121490 | IR:IG            |
| 34    | 104323 | F | 34    | 104345 | IR:IG            |
| 34    | 104323 | P | 34    | 131300 | IR:IG            |
| 34    | 104345 | P | 34    | 131322 | IR:IG            |
| 34    | 108911 | F | 34    | 108965 | <i>ycf1</i> gene |
| 34    | 108911 | P | 34    | 126680 | <i>ycf1</i> gene |
| 34    | 108965 | P | 34    | 126734 | <i>ycf1</i> gene |
| 31    | 109551 | F | 31    | 109739 | <i>ycf1</i> gene |
| 31    | 109551 | P | 31    | 125909 | <i>ycf1</i> gene |
| 40    | 109552 | F | 40    | 109722 | <i>ycf1</i> gene |
| 40    | 109552 | P | 40    | 125917 | <i>ycf1</i> gene |
| 33    | 109648 | F | 33    | 109681 | <i>ycf1</i> gene |
| 33    | 109648 | P | 33    | 125965 | <i>ycf1</i> gene |
| 33    | 109681 | P | 33    | 125998 | <i>ycf1</i> gene |
| 40    | 109722 | P | 40    | 126087 | <i>ycf1</i> gene |
| 32    | 109726 | F | 32    | 109744 | <i>ycf1</i> gene |
| 32    | 109726 | P | 32    | 125903 | <i>ycf1</i> gene |
| 31    | 109739 | P | 31    | 126097 | <i>ycf1</i> gene |
| 32    | 109744 | P | 32    | 125921 | <i>ycf1</i> gene |
| 54    | 118004 | P | 54    | 118004 | IR:IG            |
| 36    | 120122 | P | 36    | 120122 | IR:IG            |
| 30    | 120126 | F | 30    | 120130 | IR:IG            |
| 47    | 120131 | F | 47    | 120161 | IR:IG            |
| 31    | 120147 | F | 31    | 120177 | IR:IG            |
| 42    | 121490 | P | 42    | 141854 | <i>ndhA</i> gene |
| 32    | 125903 | F | 32    | 125921 | <i>ycf1</i> gene |
| 31    | 125909 | F | 31    | 126097 | <i>ycf1</i> gene |
| 40    | 125917 | F | 40    | 126087 | <i>ycf1</i> gene |

|    |        |   |    |        |                  |
|----|--------|---|----|--------|------------------|
| 30 | 125927 | F | 30 | 126097 | <i>ycf1</i> gene |
| 33 | 125965 | F | 33 | 125998 | <i>ycf1</i> gene |
| 34 | 126680 | F | 34 | 126734 | <i>ycf1</i> gene |
| 34 | 131300 | F | 34 | 131322 | IR:IG            |
| 49 | 145894 | P | 49 | 145894 | IR:IG            |
| 35 | 149543 | F | 35 | 149561 | <i>rpl2</i> gene |

***Passiflora recurva***

| <b>Repeat Length 1</b> | <b>Start Repeat 1</b> | <b>Orientation</b> | <b>Repeat Length 2</b> | <b>Start Repeat 2</b> | <b>Location in cp genome</b> |
|------------------------|-----------------------|--------------------|------------------------|-----------------------|------------------------------|
| 32                     | 4969                  | F                  | 32                     | 5000                  | LSC:IG                       |
| 31                     | 6160                  | P                  | 31                     | 6160                  | LSC:IG                       |
| 30                     | 7536                  | F                  | 30                     | 54219                 | LSC:IG                       |
| 47                     | 8092                  | P                  | 47                     | 8092                  | LSC:IG                       |
| 31                     | 9169                  | P                  | 31                     | 63068                 | <i>trnG</i> gene             |
| 40                     | 9273                  | P                  | 40                     | 9273                  | LSC:IG                       |
| 54                     | 9905                  | F                  | 54                     | 9937                  | LSC:IG                       |
| 43                     | 9916                  | F                  | 43                     | 9948                  | LSC:IG                       |
| 38                     | 10012                 | P                  | 38                     | 10012                 | LSC:IG                       |
| 30                     | 12814                 | P                  | 30                     | 12814                 | LSC:IG                       |
| 30                     | 27030                 | P                  | 30                     | 73714                 | LSC:IG                       |
| 31                     | 27038                 | P                  | 31                     | 73705                 | LSC:IG                       |
| 30                     | 27550                 | F                  | 30                     | 27559                 | <i>clpP</i> gene             |
| 31                     | 27552                 | F                  | 31                     | 27567                 | <i>clpP</i> gene             |
| 43                     | 30514                 | F                  | 43                     | 38858                 | LSC:IG                       |
| 47                     | 30548                 | F                  | 47                     | 38902                 | LSC:IG                       |
| 31                     | 30564                 | F                  | 31                     | 38918                 | LSC:IG                       |
| 31                     | 37298                 | R                  | 31                     | 37298                 | LSC:IG                       |
| 45                     | 40182                 | F                  | 45                     | 40212                 | <i>accD</i> gene             |
| 38                     | 40182                 | F                  | 38                     | 40395                 | <i>accD</i> gene             |
| 59                     | 40183                 | F                  | 59                     | 40198                 | <i>accD</i> gene             |
| 44                     | 40183                 | F                  | 44                     | 40228                 | <i>accD</i> gene             |
| 30                     | 40194                 | F                  | 30                     | 40407                 | <i>accD</i> gene             |
| 44                     | 40198                 | F                  | 44                     | 40213                 | <i>accD</i> gene             |
| 37                     | 40198                 | F                  | 37                     | 40396                 | <i>accD</i> gene             |
| 33                     | 40209                 | F                  | 33                     | 40392                 | <i>accD</i> gene             |
| 30                     | 40209                 | F                  | 30                     | 40407                 | <i>accD</i> gene             |
| 30                     | 40213                 | F                  | 30                     | 40228                 | <i>accD</i> gene             |
| 63                     | 40245                 | F                  | 63                     | 40260                 | <i>accD</i> gene             |
| 48                     | 40245                 | F                  | 48                     | 40275                 | <i>accD</i> gene             |
| 41                     | 40245                 | F                  | 41                     | 40290                 | <i>accD</i> gene             |
| 54                     | 40254                 | F                  | 54                     | 40269                 | <i>accD</i> gene             |
| 39                     | 40254                 | F                  | 39                     | 40284                 | <i>accD</i> gene             |
| 32                     | 40254                 | F                  | 32                     | 40299                 | <i>accD</i> gene             |

|     |       |   |     |       |                  |
|-----|-------|---|-----|-------|------------------|
| 39  | 40269 | F | 39  | 40284 | <i>accD</i> gene |
| 32  | 40284 | F | 32  | 40299 | <i>accD</i> gene |
| 33  | 40331 | F | 33  | 40340 | <i>accD</i> gene |
| 30  | 40358 | F | 30  | 40403 | <i>accD</i> gene |
| 57  | 40361 | F | 57  | 40376 | <i>accD</i> gene |
| 42  | 40361 | F | 42  | 40391 | <i>accD</i> gene |
| 53  | 40580 | F | 53  | 40937 | <i>accD</i> gene |
| 37  | 40580 | F | 37  | 40988 | <i>accD</i> gene |
| 194 | 40583 | F | 194 | 40634 | <i>accD</i> gene |
| 194 | 40583 | F | 194 | 40787 | <i>accD</i> gene |
| 143 | 40583 | F | 143 | 40736 | <i>accD</i> gene |
| 107 | 40583 | F | 107 | 40838 | <i>accD</i> gene |
| 92  | 40583 | F | 92  | 40685 | <i>accD</i> gene |
| 56  | 40583 | F | 56  | 40889 | <i>accD</i> gene |
| 39  | 40589 | F | 39  | 40997 | <i>accD</i> gene |
| 50  | 40596 | F | 50  | 40953 | <i>accD</i> gene |
| 163 | 40629 | F | 163 | 40782 | <i>accD</i> gene |
| 97  | 40629 | F | 97  | 40731 | <i>accD</i> gene |
| 39  | 40640 | F | 39  | 40997 | <i>accD</i> gene |
| 50  | 40647 | F | 50  | 40953 | <i>accD</i> gene |
| 199 | 40680 | F | 199 | 40731 | <i>accD</i> gene |
| 97  | 40680 | F | 97  | 40782 | <i>accD</i> gene |
| 50  | 40698 | F | 50  | 40953 | <i>accD</i> gene |
| 36  | 40698 | F | 36  | 41004 | <i>accD</i> gene |
| 38  | 40727 | F | 38  | 40982 | <i>accD</i> gene |
| 101 | 40731 | F | 101 | 40884 | <i>accD</i> gene |
| 97  | 40731 | F | 97  | 40833 | <i>accD</i> gene |
| 50  | 40749 | F | 50  | 40953 | <i>accD</i> gene |
| 36  | 40749 | F | 36  | 41004 | <i>accD</i> gene |
| 38  | 40778 | F | 38  | 40982 | <i>accD</i> gene |
| 112 | 40782 | F | 112 | 40833 | <i>accD</i> gene |
| 61  | 40782 | F | 61  | 40884 | <i>accD</i> gene |
| 39  | 40793 | F | 39  | 40997 | <i>accD</i> gene |
| 50  | 40800 | F | 50  | 40953 | <i>accD</i> gene |
| 39  | 40844 | F | 39  | 40997 | <i>accD</i> gene |
| 50  | 40851 | F | 50  | 40953 | <i>accD</i> gene |
| 87  | 40902 | F | 87  | 40953 | <i>accD</i> gene |
| 36  | 40902 | F | 36  | 41004 | <i>accD</i> gene |
| 58  | 40931 | F | 58  | 40982 | <i>accD</i> gene |
| 61  | 41190 | F | 61  | 41238 | LSC:IG:ACCD      |
| 35  | 41332 | F | 35  | 41488 | LSC:IG:ACCD      |
| 30  | 41538 | F | 30  | 41586 | LSC:IG:ACCD      |
| 60  | 41852 | F | 60  | 41882 | LSC:IG:ACCD      |
| 30  | 41852 | F | 30  | 41912 | LSC:IG:ACCD      |

|       |        |   |       |        |                  |
|-------|--------|---|-------|--------|------------------|
| 30    | 42049  | F | 30    | 42185  | LSC:IG:ACCD      |
| 33    | 42055  | F | 33    | 42080  | LSC:IG:ACCD      |
| 33    | 42055  | F | 33    | 42117  | LSC:IG:ACCD      |
| 33    | 42055  | F | 33    | 42154  | LSC:IG:ACCD      |
| 112   | 42066  | F | 112   | 42103  | LSC:IG:ACCD      |
| 75    | 42066  | F | 75    | 42140  | LSC:IG:ACCD      |
| 38    | 42066  | F | 38    | 42177  | LSC:IG:ACCD      |
| 31    | 42322  | F | 31    | 42347  | LSC:IG:ACCD      |
| 62    | 45665  | P | 62    | 45665  | LSC:IG           |
| 31    | 47602  | F | 31    | 47647  | <i>atpB</i> gene |
| 30    | 51182  | F | 30    | 51211  | LSC:IG           |
| 33    | 54488  | P | 33    | 54488  | LSC:IG           |
| 39    | 55564  | P | 39    | 97169  | <i>ycf3</i> gene |
| 39    | 55564  | P | 39    | 122491 | <i>ycf3</i> gene |
| 39    | 55564  | F | 39    | 140493 | <i>ycf3</i> gene |
| 37    | 56925  | F | 37    | 56945  | LSC:IG           |
| 79    | 58590  | F | 79    | 60814  | <i>psaA</i> gene |
| 67    | 58602  | F | 67    | 60826  | <i>psaA</i> gene |
| 39    | 58630  | F | 39    | 60854  | <i>psaA</i> gene |
| 30    | 62233  | F | 30    | 62255  | LSC:IG           |
| 34    | 73093  | F | 34    | 73234  | LSC:IG           |
| 45    | 73189  | F | 45    | 73251  | LSC:IG           |
| 33    | 73201  | F | 33    | 73263  | LSC:IG           |
| 42    | 73216  | F | 42    | 73322  | LSC:IG           |
| 95    | 73520  | F | 95    | 73592  | LSC:IG           |
| 26235 | 85864  | P | 26235 | 125602 | IR               |
| 35    | 87082  | F | 35    | 87100  | <i>rpl2</i> gene |
| 35    | 87082  | P | 35    | 150566 | <i>rpl2</i> gene |
| 35    | 87100  | P | 35    | 150584 | <i>rpl2</i> gene |
| 49    | 93121  | P | 49    | 93121  | IR:IG            |
| 49    | 93121  | F | 49    | 144531 | IR:IG            |
| 42    | 97167  | F | 42    | 122489 | IR:IG            |
| 57    | 107321 | F | 57    | 107407 | IR:IG            |
| 57    | 107321 | P | 57    | 130237 | IR:IG            |
| 30    | 107348 | F | 30    | 107474 | IR:IG            |
| 30    | 107348 | F | 30    | 107514 | IR:IG            |
| 30    | 107348 | P | 30    | 130157 | IR:IG            |
| 30    | 107348 | P | 30    | 130197 | IR:IG            |
| 36    | 107365 | F | 36    | 107579 | IR:IG            |
| 36    | 107365 | P | 36    | 130086 | IR:IG            |
| 57    | 107407 | P | 57    | 130323 | IR:IG            |
| 75    | 107434 | F | 75    | 107474 | IR:IG            |
| 75    | 107434 | P | 75    | 130152 | IR:IG            |
| 35    | 107434 | F | 35    | 107514 | IR:IG            |

|    |        |   |    |        |                  |
|----|--------|---|----|--------|------------------|
| 35 | 107434 | P | 35 | 130152 | IR:IG            |
| 56 | 107453 | F | 56 | 107493 | IR:IG            |
| 56 | 107453 | P | 56 | 130152 | IR:IG            |
| 75 | 107474 | P | 75 | 130192 | IR:IG            |
| 30 | 107474 | P | 30 | 130323 | IR:IG            |
| 56 | 107493 | P | 56 | 130192 | IR:IG            |
| 35 | 107514 | P | 35 | 130232 | IR:IG            |
| 30 | 107514 | P | 30 | 130323 | IR:IG            |
| 36 | 107579 | P | 36 | 130300 | IR:IG            |
| 32 | 110586 | F | 32 | 110757 | <i>ycf1</i> gene |
| 32 | 110586 | P | 32 | 126912 | <i>ycf1</i> gene |
| 31 | 110604 | F | 31 | 110622 | <i>ycf1</i> gene |
| 31 | 110604 | P | 31 | 127048 | <i>ycf1</i> gene |
| 31 | 110622 | P | 31 | 127066 | <i>ycf1</i> gene |
| 33 | 110749 | F | 33 | 110767 | <i>ycf1</i> gene |
| 33 | 110749 | P | 33 | 126901 | <i>ycf1</i> gene |
| 32 | 110757 | P | 32 | 127083 | <i>ycf1</i> gene |
| 33 | 110767 | P | 33 | 126919 | <i>ycf1</i> gene |
| 54 | 119035 | P | 54 | 119035 | SSC:IG           |
| 31 | 121153 | P | 31 | 121176 | SSC:IG           |
| 30 | 121154 | F | 30 | 121158 | SSC:IG           |
| 30 | 121154 | P | 30 | 121172 | SSC:IG           |
| 42 | 122489 | P | 42 | 140492 | <i>ndhA</i> gene |
| 33 | 126901 | F | 33 | 126919 | <i>ycf1</i> gene |
| 32 | 126912 | F | 32 | 127083 | <i>ycf1</i> gene |
| 31 | 127048 | F | 31 | 127066 | <i>ycf1</i> gene |
| 36 | 130086 | F | 36 | 130300 | IR:IG            |
| 30 | 130096 | F | 30 | 130310 | IR:IG            |
| 75 | 130152 | F | 75 | 130192 | IR:IG            |
| 35 | 130152 | F | 35 | 130232 | IR:IG            |
| 30 | 130157 | F | 30 | 130323 | IR:IG            |
| 30 | 130197 | F | 30 | 130323 | IR:IG            |
| 57 | 130237 | F | 57 | 130323 | IR:IG            |
| 45 | 130249 | F | 45 | 130335 | IR:IG            |
| 49 | 144531 | P | 49 | 144531 | IR:IG            |
| 35 | 150566 | F | 35 | 150584 | <i>rpl2</i> gene |

---

*Passiflora watsoniana*

---

| Repeat Length 1 | Start Repeat 1 | Orientation | Repeat Length 2 | Start Repeat 2 | Location in cp genome |
|-----------------|----------------|-------------|-----------------|----------------|-----------------------|
| 32              | 5335           | R           | 32              | 5341           | LSC:IG                |
| 30              | 7448           | F           | 30              | 54463          | LSC:IG                |
| 47              | 8011           | P           | 47              | 8011           | <i>trnG</i> gene      |
| 31              | 9097           | P           | 31              | 63314          | LSC:IG                |

|     |       |   |     |        |                  |
|-----|-------|---|-----|--------|------------------|
| 34  | 9863  | F | 34  | 118593 | LSC:IG           |
| 33  | 9863  | P | 33  | 118602 | LSC:IG           |
| 30  | 13620 | F | 30  | 13635  | LSC:IG           |
| 32  | 27337 | F | 32  | 27412  | <i>clpP</i> gene |
| 32  | 27347 | P | 32  | 73800  | <i>clpP</i> gene |
| 59  | 30933 | F | 59  | 39300  | LSC:IG           |
| 64  | 30960 | F | 64  | 39327  | LSC:IG           |
| 46  | 30978 | F | 46  | 39345  | LSC:IG           |
| 31  | 30993 | F | 31  | 39360  | LSC:IG           |
| 33  | 37728 | F | 33  | 37742  | LSC:IG           |
| 31  | 37729 | R | 31  | 37729  | LSC:IG           |
| 31  | 37729 | R | 31  | 37743  | LSC:IG           |
| 35  | 40612 | F | 35  | 40663  | <i>accD</i> gene |
| 30  | 40632 | F | 30  | 40647  | <i>accD</i> gene |
| 32  | 40658 | F | 32  | 40679  | <i>accD</i> gene |
| 32  | 40697 | F | 32  | 40784  | <i>accD</i> gene |
| 51  | 40702 | F | 51  | 40828  | <i>accD</i> gene |
| 30  | 40705 | F | 30  | 41026  | <i>accD</i> gene |
| 30  | 40705 | F | 30  | 41017  | <i>accD</i> gene |
| 36  | 40717 | F | 36  | 40843  | <i>accD</i> gene |
| 32  | 40721 | F | 32  | 40766  | <i>accD</i> gene |
| 56  | 40727 | F | 56  | 40742  | <i>accD</i> gene |
| 41  | 40727 | F | 41  | 40757  | <i>accD</i> gene |
| 41  | 40727 | F | 41  | 40877  | <i>accD</i> gene |
| 33  | 40727 | F | 33  | 40892  | <i>accD</i> gene |
| 41  | 40742 | F | 41  | 40877  | <i>accD</i> gene |
| 51  | 40757 | F | 51  | 40877  | <i>accD</i> gene |
| 30  | 40768 | F | 30  | 40873  | <i>accD</i> gene |
| 32  | 40772 | F | 32  | 40853  | <i>accD</i> gene |
| 30  | 40787 | F | 30  | 40826  | <i>accD</i> gene |
| 33  | 40792 | F | 33  | 41017  | <i>accD</i> gene |
| 33  | 40796 | F | 33  | 40811  | <i>accD</i> gene |
| 30  | 40799 | F | 30  | 41018  | <i>accD</i> gene |
| 30  | 40831 | F | 30  | 41026  | <i>accD</i> gene |
| 30  | 40831 | F | 30  | 41017  | <i>accD</i> gene |
| 30  | 40849 | F | 30  | 40873  | <i>accD</i> gene |
| 32  | 40853 | F | 32  | 40892  | <i>accD</i> gene |
| 33  | 40877 | F | 33  | 40892  | <i>accD</i> gene |
| 40  | 41002 | F | 40  | 41011  | <i>accD</i> gene |
| 31  | 41002 | F | 31  | 41020  | <i>accD</i> gene |
| 32  | 41010 | F | 32  | 41019  | <i>accD</i> gene |
| 103 | 41089 | F | 103 | 41140  | <i>accD</i> gene |
| 52  | 41089 | F | 52  | 41191  | <i>accD</i> gene |
| 88  | 41104 | F | 88  | 41155  | <i>accD</i> gene |



|     |       |   |     |       |                  |
|-----|-------|---|-----|-------|------------------|
| 37  | 41104 | F | 37  | 41206 | <i>accD</i> gene |
| 30  | 41391 | F | 30  | 42054 | LSC:IG:ACCD      |
| 60  | 41393 | F | 60  | 42008 | LSC:IG:ACCD      |
| 59  | 41393 | F | 59  | 41906 | LSC:IG:ACCD      |
| 30  | 41423 | F | 30  | 42038 | LSC:IG:ACCD      |
| 31  | 41426 | F | 31  | 41939 | LSC:IG:ACCD      |
| 64  | 41428 | F | 64  | 41497 | LSC:IG:ACCD      |
| 44  | 41455 | F | 44  | 41524 | LSC:IG:ACCD      |
| 31  | 41455 | F | 31  | 41593 | LSC:IG:ACCD      |
| 44  | 41470 | F | 44  | 41608 | LSC:IG:ACCD      |
| 34  | 41476 | F | 34  | 41545 | LSC:IG:ACCD      |
| 37  | 41477 | F | 37  | 41669 | LSC:IG:ACCD      |
| 41  | 41481 | F | 41  | 41979 | LSC:IG:ACCD      |
| 33  | 41481 | F | 33  | 41619 | LSC:IG:ACCD      |
| 33  | 41481 | F | 33  | 41721 | LSC:IG:ACCD      |
| 33  | 41481 | F | 33  | 41775 | LSC:IG:ACCD      |
| 31  | 41481 | F | 31  | 41823 | LSC:IG:ACCD      |
| 35  | 41487 | F | 35  | 41883 | LSC:IG:ACCD      |
| 31  | 41518 | F | 31  | 41587 | LSC:IG:ACCD      |
| 40  | 41539 | F | 40  | 41608 | LSC:IG:ACCD      |
| 33  | 41546 | F | 33  | 41669 | LSC:IG:ACCD      |
| 33  | 41546 | F | 33  | 41771 | LSC:IG:ACCD      |
| 33  | 41546 | F | 33  | 41975 | LSC:IG:ACCD      |
| 51  | 41615 | F | 51  | 41669 | LSC:IG:ACCD      |
| 51  | 41615 | F | 51  | 41771 | LSC:IG:ACCD      |
| 46  | 41615 | F | 46  | 41717 | LSC:IG:ACCD      |
| 39  | 41615 | F | 39  | 41975 | LSC:IG:ACCD      |
| 39  | 41615 | F | 39  | 41873 | LSC:IG:ACCD      |
| 35  | 41615 | F | 35  | 41819 | LSC:IG:ACCD      |
| 68  | 41627 | F | 68  | 41729 | LSC:IG:ACCD      |
| 34  | 41627 | F | 34  | 41831 | LSC:IG:ACCD      |
| 110 | 41642 | F | 110 | 41744 | LSC:IG:ACCD      |
| 42  | 41642 | F | 42  | 41846 | LSC:IG:ACCD      |
| 44  | 41651 | F | 44  | 41855 | LSC:IG:ACCD      |
| 147 | 41663 | F | 147 | 41765 | LSC:IG:ACCD      |
| 45  | 41663 | F | 45  | 41969 | LSC:IG:ACCD      |
| 45  | 41663 | F | 45  | 41867 | LSC:IG:ACCD      |
| 45  | 41666 | F | 45  | 41714 | LSC:IG:ACCD      |
| 38  | 41666 | F | 38  | 41816 | LSC:IG:ACCD      |
| 39  | 41681 | F | 39  | 41729 | LSC:IG:ACCD      |
| 35  | 41681 | F | 35  | 41831 | LSC:IG:ACCD      |
| 114 | 41696 | F | 114 | 41798 | LSC:IG:ACCD      |
| 50  | 41714 | F | 50  | 41768 | LSC:IG:ACCD      |
| 42  | 41714 | F | 42  | 41870 | LSC:IG:ACCD      |

|       |        |   |       |        |                  |
|-------|--------|---|-------|--------|------------------|
| 39    | 41729  | F | 39    | 41783  | LSC:IG:ACCD      |
| 30    | 41729  | F | 30    | 41885  | LSC:IG:ACCD      |
| 57    | 41753  | F | 57    | 41855  | LSC:IG:ACCD      |
| 49    | 41761  | F | 49    | 41965  | LSC:IG:ACCD      |
| 45    | 41768  | F | 45    | 41816  | LSC:IG:ACCD      |
| 39    | 41783  | F | 39    | 41831  | LSC:IG:ACCD      |
| 38    | 41816  | F | 38    | 41870  | LSC:IG:ACCD      |
| 102   | 41863  | F | 102   | 41965  | LSC:IG:ACCD      |
| 41    | 41893  | F | 41    | 42043  | LSC:IG:ACCD      |
| 65    | 41900  | F | 65    | 42002  | LSC:IG:ACCD      |
| 41    | 41995  | F | 41    | 42043  | LSC:IG:ACCD      |
| 54    | 42424  | F | 54    | 42500  | LSC:IG:ACCD      |
| 62    | 45852  | P | 62    | 45852  | LSC:IG           |
| 42    | 47778  | F | 42    | 47823  | <i>atpB</i> gene |
| 31    | 47789  | F | 31    | 47834  | <i>atpB</i> gene |
| 30    | 48195  | F | 30    | 48220  | LSC:IG           |
| 30    | 48696  | F | 30    | 48711  | LSC:IG           |
| 30    | 51405  | F | 30    | 51434  | LSC:IG           |
| 32    | 53330  | P | 32    | 53330  | LSC:IG           |
| 33    | 54749  | P | 33    | 54749  | LSC:IG           |
| 39    | 55820  | P | 39    | 95118  | <i>ycf3</i> gene |
| 39    | 55820  | P | 39    | 119961 | <i>ycf3</i> gene |
| 39    | 55820  | F | 39    | 137503 | <i>ycf3</i> gene |
| 37    | 57167  | F | 37    | 57187  | LSC:IG           |
| 79    | 58862  | F | 79    | 61086  | <i>psaA</i> gene |
| 67    | 58874  | F | 67    | 61098  | <i>psaA</i> gene |
| 39    | 58902  | F | 39    | 61126  | <i>psaA</i> gene |
| 122   | 73643  | F | 122   | 73703  | LSC:IG           |
| 62    | 73643  | F | 62    | 73763  | LSC:IG           |
| 113   | 73652  | F | 113   | 73712  | LSC:IG           |
| 53    | 73652  | F | 53    | 73772  | LSC:IG           |
| 44    | 76187  | P | 44    | 76187  | LSC:IG           |
| 31    | 83444  | F | 31    | 83470  | LSC:IG           |
| 53    | 86060  | F | 53    | 86073  | LSC:IG           |
| 35    | 86060  | F | 35    | 86086  | LSC:IG           |
| 23513 | 86140  | P | 23513 | 123007 | IR               |
| 35    | 87368  | F | 35    | 87386  | <i>rpl2</i> gene |
| 35    | 87368  | P | 35    | 145239 | <i>rpl2</i> gene |
| 35    | 87386  | P | 35    | 145257 | <i>rpl2</i> gene |
| 49    | 91069  | P | 49    | 91069  | IR:IG            |
| 49    | 91069  | F | 49    | 141542 | IR:IG            |
| 42    | 95116  | F | 42    | 119959 | IR:IG            |
| 43    | 108051 | F | 43    | 108216 | <i>ycf1</i> gene |
| 43    | 108051 | P | 43    | 124401 | <i>ycf1</i> gene |

|    |        |   |    |        |                  |
|----|--------|---|----|--------|------------------|
| 33 | 108142 | F | 33 | 108175 | <i>ycf1</i> gene |
| 33 | 108142 | P | 33 | 124452 | <i>ycf1</i> gene |
| 33 | 108175 | P | 33 | 124485 | <i>ycf1</i> gene |
| 43 | 108216 | P | 43 | 124566 | <i>ycf1</i> gene |
| 30 | 108914 | F | 30 | 108938 | <i>ycf1</i> gene |
| 30 | 108914 | P | 30 | 123692 | <i>ycf1</i> gene |
| 30 | 108938 | P | 30 | 123716 | <i>ycf1</i> gene |
| 54 | 116445 | P | 54 | 116445 | SSC:IG           |
| 32 | 118392 | F | 32 | 118417 | SSC:IG           |
| 32 | 118593 | P | 32 | 118633 | SSC:IG           |
| 30 | 118596 | P | 30 | 118622 | SSC:IG           |
| 34 | 118598 | F | 34 | 118608 | SSC:IG           |
| 33 | 118613 | R | 33 | 118613 | SSC:IG           |
| 33 | 118613 | R | 33 | 118617 | SSC:IG           |
| 30 | 118658 | F | 30 | 118673 | SSC:IG           |
| 42 | 119959 | P | 42 | 137502 | <i>ndhA</i> gene |
| 30 | 123692 | F | 30 | 123716 | <i>ycf1</i> gene |
| 43 | 124401 | F | 43 | 124566 | <i>ycf1</i> gene |
| 30 | 124414 | F | 30 | 124579 | <i>ycf1</i> gene |
| 33 | 124452 | F | 33 | 124485 | <i>ycf1</i> gene |
| 49 | 141542 | P | 49 | 141542 | IR:IG            |
| 35 | 145239 | F | 35 | 145257 | <i>rpl2</i> gene |

*Dilkea retusa*

| Repeat Length 1 | Start Repeat 1 | Orientation | Repeat Length 2 | Start Repeat 2 | Location in cp genome |
|-----------------|----------------|-------------|-----------------|----------------|-----------------------|
| 32              | 4397           | R           | 32              | 4397           | LSC:IG                |
| 35              | 7212           | P           | 35              | 46444          | LSC:IG                |
| 31              | 7628           | R           | 31              | 7628           | LSC:IG                |
| 37              | 7793           | P           | 37              | 7793           | LSC:IG                |
| 31              | 8890           | F           | 31              | 37730          | <i>trnG</i> gene      |
| 32              | 9616           | P           | 32              | 128058         | LSC:IG                |
| 31              | 9617           | F           | 31              | 12163          | LSC:IG                |
| 34              | 12160          | R           | 34              | 12167          | LSC:IG                |
| 33              | 12163          | P           | 33              | 128056         | LSC:IG                |
| 30              | 12164          | C           | 30              | 128055         | LSC:IG                |
| 35              | 12167          | F           | 35              | 12179          | LSC:IG                |
| 31              | 12167          | P           | 31              | 12182          | LSC:IG                |
| 37              | 12168          | R           | 37              | 12168          | LSC:IG                |
| 30              | 12168          | C           | 30              | 12187          | LSC:IG                |
| 30              | 12175          | C           | 30              | 12182          | LSC:IG                |
| 36              | 12178          | P           | 36              | 12178          | LSC:IG                |
| 30              | 12187          | P           | 30              | 12187          | LSC:IG                |
| 30              | 12260          | R           | 30              | 12260          | LSC:IG                |

|    |       |   |    |        |                   |
|----|-------|---|----|--------|-------------------|
| 39 | 27064 | F | 39 | 27082  | LSC:IG            |
| 36 | 31838 | P | 36 | 31870  | LSC:IG            |
| 34 | 31848 | P | 34 | 31862  | LSC:IG            |
| 44 | 33110 | F | 44 | 33132  | LSC:IG            |
| 30 | 36675 | P | 30 | 46451  | LSC:IG            |
| 81 | 39907 | F | 81 | 42131  | <i>psaB</i> gene  |
| 41 | 39947 | F | 41 | 42171  | <i>psaB</i> gene  |
| 39 | 45097 | F | 39 | 100771 | <i>ycf3</i> gene  |
| 39 | 45097 | F | 39 | 129364 | <i>ycf3</i> gene  |
| 39 | 45097 | P | 39 | 149689 | <i>ycf3</i> gene  |
| 30 | 45098 | P | 30 | 77815  | <i>ycf3</i> gene  |
| 33 | 46168 | P | 33 | 46168  | LSC:IG            |
| 30 | 49459 | F | 30 | 49484  | LSC:IG            |
| 42 | 53058 | F | 42 | 53103  | LSC:IG            |
| 46 | 55023 | P | 46 | 55023  | LSC:IG            |
| 61 | 58547 | F | 61 | 58574  | LSC:IG:ACCD       |
| 34 | 58547 | F | 34 | 58601  | LSC:IG:ACCD       |
| 88 | 58894 | F | 88 | 58948  | <i>accD</i> gene  |
| 34 | 58894 | F | 34 | 59002  | <i>accD</i> gene  |
| 41 | 59261 | F | 41 | 59558  | <i>accD</i> gene  |
| 30 | 59285 | F | 30 | 59432  | <i>accD</i> gene  |
| 82 | 59329 | F | 82 | 59341  | <i>accD</i> gene  |
| 58 | 59329 | F | 58 | 59365  | <i>accD</i> gene  |
| 67 | 59332 | F | 67 | 59356  | <i>accD</i> gene  |
| 43 | 59332 | F | 43 | 59380  | <i>accD</i> gene  |
| 31 | 59332 | F | 31 | 59392  | <i>accD</i> gene  |
| 67 | 59344 | F | 67 | 59356  | <i>accD</i> gene  |
| 43 | 59344 | F | 43 | 59380  | <i>accD</i> gene  |
| 31 | 59344 | F | 31 | 59392  | <i>accD</i> gene  |
| 55 | 59356 | F | 55 | 59368  | <i>accD</i> gene  |
| 43 | 59368 | F | 43 | 59380  | <i>accD</i> gene  |
| 31 | 59368 | F | 31 | 59392  | <i>accD</i> gene  |
| 64 | 59449 | F | 64 | 59464  | <i>accD</i> gene  |
| 49 | 59449 | F | 49 | 59479  | <i>accD</i> gene  |
| 34 | 59449 | F | 34 | 59494  | <i>accD</i> gene  |
| 31 | 59491 | F | 31 | 59506  | <i>accD</i> gene  |
| 53 | 60741 | F | 53 | 68984  | LSC:IG:ACCD       |
| 44 | 60794 | F | 44 | 69038  | LSC:IG:ACCD       |
| 93 | 69940 | F | 93 | 69982  | <i>rps18</i> gene |
| 51 | 69940 | F | 51 | 70024  | <i>rps18</i> gene |
| 34 | 72104 | F | 34 | 115407 | <i>clpP</i> gene  |
| 34 | 72104 | P | 34 | 135058 | <i>clpP</i> gene  |
| 32 | 72383 | F | 32 | 72401  | <i>clpP</i> gene  |
| 31 | 76392 | P | 31 | 76407  | LSC:IG            |

|       |        |   |       |        |                  |
|-------|--------|---|-------|--------|------------------|
| 49    | 85683  | F | 49    | 85707  | LSC:IG           |
| 30331 | 88576  | P | 30331 | 131592 | IR               |
| 48    | 88852  | F | 48    | 88882  | IR:IG            |
| 48    | 88852  | P | 48    | 161569 | IR:IG            |
| 48    | 88882  | P | 48    | 161599 | IR:IG            |
| 44    | 95112  | F | 44    | 95133  | <i>ycf2</i> gene |
| 44    | 95112  | P | 44    | 155322 | <i>ycf2</i> gene |
| 44    | 95133  | P | 44    | 155343 | <i>ycf2</i> gene |
| 30    | 95159  | F | 30    | 95243  | <i>ycf2</i> gene |
| 30    | 95159  | P | 30    | 155226 | <i>ycf2</i> gene |
| 50    | 95163  | F | 50    | 95205  | <i>ycf2</i> gene |
| 50    | 95163  | P | 50    | 155244 | <i>ycf2</i> gene |
| 30    | 95163  | F | 30    | 95226  | <i>ycf2</i> gene |
| 30    | 95163  | P | 30    | 155243 | <i>ycf2</i> gene |
| 55    | 95173  | F | 55    | 95215  | <i>ycf2</i> gene |
| 55    | 95173  | P | 55    | 155229 | <i>ycf2</i> gene |
| 38    | 95175  | F | 38    | 95196  | <i>ycf2</i> gene |
| 38    | 95175  | P | 38    | 155265 | <i>ycf2</i> gene |
| 32    | 95175  | F | 32    | 95238  | <i>ycf2</i> gene |
| 32    | 95175  | P | 32    | 155229 | <i>ycf2</i> gene |
| 42    | 95190  | F | 42    | 95232  | <i>ycf2</i> gene |
| 42    | 95190  | P | 42    | 155225 | <i>ycf2</i> gene |
| 39    | 95196  | F | 39    | 95217  | <i>ycf2</i> gene |
| 39    | 95196  | P | 39    | 155243 | <i>ycf2</i> gene |
| 38    | 95196  | P | 38    | 155286 | <i>ycf2</i> gene |
| 50    | 95205  | P | 50    | 155286 | <i>ycf2</i> gene |
| 55    | 95215  | P | 55    | 155271 | <i>ycf2</i> gene |
| 39    | 95217  | P | 39    | 155264 | <i>ycf2</i> gene |
| 36    | 95217  | F | 36    | 95238  | <i>ycf2</i> gene |
| 36    | 95217  | P | 36    | 155225 | <i>ycf2</i> gene |
| 30    | 95226  | P | 30    | 155306 | <i>ycf2</i> gene |
| 42    | 95232  | P | 42    | 155267 | <i>ycf2</i> gene |
| 36    | 95238  | P | 36    | 155246 | <i>ycf2</i> gene |
| 32    | 95238  | P | 32    | 155292 | <i>ycf2</i> gene |
| 30    | 95243  | P | 30    | 155310 | <i>ycf2</i> gene |
| 57    | 95277  | F | 57    | 112489 | <i>ycf2</i> gene |
| 57    | 95277  | P | 57    | 137953 | <i>ycf2</i> gene |
| 31    | 95311  | R | 31    | 112516 | <i>ycf2</i> gene |
| 31    | 95311  | C | 31    | 137952 | <i>ycf2</i> gene |
| 30    | 95312  | C | 30    | 155165 | <i>ycf2</i> gene |
| 42    | 100769 | F | 42    | 129362 | IR:IG            |
| 96    | 109852 | F | 96    | 109884 | IR:IG            |
| 96    | 109852 | P | 96    | 140519 | IR:IG            |
| 64    | 109852 | F | 64    | 109916 | IR:IG            |

|     |        |   |     |        |       |
|-----|--------|---|-----|--------|-------|
| 64  | 109852 | P | 64  | 140519 | IR:IG |
| 32  | 109852 | F | 32  | 109948 | IR:IG |
| 32  | 109852 | P | 32  | 140519 | IR:IG |
| 77  | 109871 | F | 77  | 109903 | IR:IG |
| 77  | 109871 | P | 77  | 140519 | IR:IG |
| 45  | 109871 | F | 45  | 109935 | IR:IG |
| 45  | 109871 | P | 45  | 140519 | IR:IG |
| 96  | 109884 | P | 96  | 140551 | IR:IG |
| 77  | 109903 | P | 77  | 140551 | IR:IG |
| 64  | 109916 | P | 64  | 140583 | IR:IG |
| 45  | 109935 | P | 45  | 140583 | IR:IG |
| 32  | 109948 | P | 32  | 140615 | IR:IG |
| 56  | 111266 | F | 56  | 111288 | IR:IG |
| 56  | 111266 | P | 56  | 139155 | IR:IG |
| 34  | 111266 | F | 34  | 111310 | IR:IG |
| 34  | 111266 | P | 34  | 139155 | IR:IG |
| 40  | 111274 | F | 40  | 111296 | IR:IG |
| 40  | 111274 | P | 40  | 139163 | IR:IG |
| 56  | 111288 | P | 56  | 139177 | IR:IG |
| 40  | 111296 | P | 40  | 139185 | IR:IG |
| 34  | 111310 | P | 34  | 139199 | IR:IG |
| 67  | 111449 | F | 67  | 111579 | IR:IG |
| 67  | 111449 | P | 67  | 138853 | IR:IG |
| 106 | 111474 | F | 106 | 111494 | IR:IG |
| 106 | 111474 | P | 106 | 138899 | IR:IG |
| 86  | 111474 | F | 86  | 111514 | IR:IG |
| 86  | 111474 | P | 86  | 138899 | IR:IG |
| 66  | 111474 | F | 66  | 111534 | IR:IG |
| 66  | 111474 | P | 66  | 138899 | IR:IG |
| 46  | 111474 | F | 46  | 111554 | IR:IG |
| 46  | 111474 | P | 46  | 138899 | IR:IG |
| 106 | 111494 | P | 106 | 138919 | IR:IG |
| 42  | 111494 | F | 42  | 111604 | IR:IG |
| 42  | 111494 | P | 42  | 138853 | IR:IG |
| 86  | 111514 | P | 86  | 138939 | IR:IG |
| 42  | 111514 | F | 42  | 111604 | IR:IG |
| 42  | 111514 | P | 42  | 138853 | IR:IG |
| 66  | 111534 | P | 66  | 138959 | IR:IG |
| 42  | 111534 | F | 42  | 111604 | IR:IG |
| 42  | 111534 | P | 42  | 138853 | IR:IG |
| 51  | 111554 | F | 51  | 111604 | IR:IG |
| 51  | 111554 | P | 51  | 138844 | IR:IG |
| 46  | 111554 | P | 46  | 138979 | IR:IG |
| 67  | 111579 | P | 67  | 138983 | IR:IG |

|    |        |   |    |        |                  |
|----|--------|---|----|--------|------------------|
| 51 | 111604 | P | 51 | 138894 | IR:IG            |
| 42 | 111604 | P | 42 | 138923 | IR:IG            |
| 42 | 111604 | P | 42 | 138943 | IR:IG            |
| 42 | 111604 | P | 42 | 138963 | IR:IG            |
| 57 | 112489 | P | 57 | 155165 | <i>ycfI</i> gene |
| 31 | 112516 | C | 31 | 155157 | <i>ycfI</i> gene |
| 38 | 116062 | F | 38 | 116197 | <i>ycfI</i> gene |
| 38 | 116062 | P | 38 | 134264 | <i>ycfI</i> gene |
| 33 | 116080 | F | 33 | 116215 | <i>ycfI</i> gene |
| 33 | 116080 | P | 33 | 134251 | <i>ycfI</i> gene |
| 67 | 116092 | F | 67 | 116119 | <i>ycfI</i> gene |
| 67 | 116092 | P | 67 | 134313 | <i>ycfI</i> gene |
| 40 | 116092 | F | 40 | 116146 | <i>ycfI</i> gene |
| 40 | 116092 | P | 40 | 134313 | <i>ycfI</i> gene |
| 63 | 116101 | F | 63 | 116128 | <i>ycfI</i> gene |
| 63 | 116101 | P | 63 | 134308 | <i>ycfI</i> gene |
| 36 | 116101 | F | 36 | 116155 | <i>ycfI</i> gene |
| 36 | 116101 | P | 36 | 134308 | <i>ycfI</i> gene |
| 67 | 116119 | P | 67 | 134340 | <i>ycfI</i> gene |
| 63 | 116128 | P | 63 | 134335 | <i>ycfI</i> gene |
| 40 | 116146 | P | 40 | 134367 | <i>ycfI</i> gene |
| 36 | 116155 | P | 36 | 134362 | <i>ycfI</i> gene |
| 38 | 116197 | P | 38 | 134399 | <i>ycfI</i> gene |
| 33 | 116215 | P | 33 | 134386 | <i>ycfI</i> gene |
| 36 | 116679 | F | 36 | 116697 | <i>ycfI</i> gene |
| 36 | 116679 | P | 36 | 133766 | <i>ycfI</i> gene |
| 36 | 116697 | P | 36 | 133784 | <i>ycfI</i> gene |
| 34 | 125893 | P | 34 | 125935 | SSC:IG           |
| 31 | 128056 | F | 31 | 128064 | SSC:IG           |
| 42 | 129362 | P | 42 | 149688 | <i>ndhA</i> gene |
| 36 | 133766 | F | 36 | 133784 | <i>ycfI</i> gene |
| 33 | 134251 | F | 33 | 134386 | <i>ycfI</i> gene |
| 38 | 134264 | F | 38 | 134399 | <i>ycfI</i> gene |
| 67 | 134313 | F | 67 | 134340 | <i>ycfI</i> gene |
| 40 | 134313 | F | 40 | 134367 | <i>ycfI</i> gene |
| 50 | 134330 | F | 50 | 134357 | <i>ycfI</i> gene |
| 31 | 137952 | R | 31 | 155157 | <i>ycfI</i> gene |
| 57 | 137953 | F | 57 | 155165 | <i>ycfI</i> gene |
| 34 | 137976 | F | 34 | 155188 | <i>ycfI</i> gene |
| 51 | 138844 | F | 51 | 138894 | IR:IG            |
| 67 | 138853 | F | 67 | 138983 | IR:IG            |
| 42 | 138853 | F | 42 | 138903 | IR:IG            |
| 42 | 138853 | F | 42 | 138923 | IR:IG            |
| 42 | 138853 | F | 42 | 138943 | IR:IG            |

|     |        |   |     |        |                  |
|-----|--------|---|-----|--------|------------------|
| 42  | 138853 | F | 42  | 138963 | IR:IG            |
| 106 | 138899 | F | 106 | 138919 | IR:IG            |
| 86  | 138899 | F | 86  | 138939 | IR:IG            |
| 66  | 138899 | F | 66  | 138959 | IR:IG            |
| 46  | 138899 | F | 46  | 138979 | IR:IG            |
| 56  | 139155 | F | 56  | 139177 | IR:IG            |
| 34  | 139155 | F | 34  | 139199 | IR:IG            |
| 96  | 140519 | F | 96  | 140551 | IR:IG            |
| 64  | 140519 | F | 64  | 140583 | IR:IG            |
| 32  | 140519 | F | 32  | 140615 | IR:IG            |
| 36  | 155225 | F | 36  | 155246 | <i>ycf2</i> gene |
| 30  | 155226 | F | 30  | 155310 | <i>ycf2</i> gene |
| 55  | 155229 | F | 55  | 155271 | <i>ycf2</i> gene |
| 32  | 155229 | F | 32  | 155292 | <i>ycf2</i> gene |
| 39  | 155243 | F | 39  | 155264 | <i>ycf2</i> gene |
| 30  | 155243 | F | 30  | 155306 | <i>ycf2</i> gene |
| 50  | 155244 | F | 50  | 155286 | <i>ycf2</i> gene |
| 38  | 155265 | F | 38  | 155286 | <i>ycf2</i> gene |
| 44  | 155322 | F | 44  | 155343 | <i>ycf2</i> gene |
| 48  | 161569 | F | 48  | 161599 | IR:IG            |

*Mitostemma brevifilis*

| Repeat Length 1 | Start Repeat 1 | Orientation | Repeat Length 2 | Start Repeat 2 | Location in cp genome |
|-----------------|----------------|-------------|-----------------|----------------|-----------------------|
| 33              | 9738           | F           | 33              | 9753           | LSC:IG                |
| 81              | 39935          | F           | 81              | 42159          | <i>psaB</i> gene      |
| 41              | 39975          | F           | 41              | 42199          | <i>psaB</i> gene      |
| 39              | 45130          | F           | 39              | 101042         | <i>ycf3</i> gene      |
| 39              | 45130          | F           | 39              | 130042         | <i>ycf3</i> gene      |
| 39              | 45130          | P           | 39              | 150789         | <i>ycf3</i> gene      |
| 42              | 53090          | F           | 42              | 53135          | LSC:IG                |
| 46              | 55055          | P           | 46              | 55055          | LSC:IG                |
| 109             | 58329          | F           | 109             | 58447          | LSC:IG:ACCD           |
| 96              | 58342          | F           | 96              | 58460          | LSC:IG:ACCD           |
| 78              | 58360          | F           | 78              | 58478          | LSC:IG:ACCD           |
| 142             | 58988          | F           | 142             | 59042          | <i>accD</i> gene      |
| 88              | 58988          | F           | 88              | 59096          | <i>accD</i> gene      |
| 71              | 59005          | F           | 71              | 59113          | <i>accD</i> gene      |
| 71              | 59059          | F           | 71              | 59113          | <i>accD</i> gene      |
| 49              | 59409          | F           | 49              | 59727          | <i>accD</i> gene      |
| 115             | 59480          | F           | 115             | 59492          | <i>accD</i> gene      |
| 103             | 59480          | F           | 103             | 59504          | <i>accD</i> gene      |
| 91              | 59480          | F           | 91              | 59516          | <i>accD</i> gene      |
| 79              | 59480          | F           | 79              | 59528          | <i>accD</i> gene      |



|       |        |   |       |        |                   |
|-------|--------|---|-------|--------|-------------------|
| 67    | 59480  | F | 67    | 59540  | <i>accD</i> gene  |
| 55    | 59480  | F | 55    | 59552  | <i>accD</i> gene  |
| 43    | 59480  | F | 43    | 59564  | <i>accD</i> gene  |
| 49    | 59633  | F | 49    | 59648  | <i>accD</i> gene  |
| 53    | 60906  | F | 53    | 69195  | LSC:IG:ACCD       |
| 44    | 60959  | F | 44    | 69249  | LSC:IG:ACCD       |
| 78    | 70149  | F | 78    | 70191  | <i>rps18</i> gene |
| 51    | 70149  | F | 51    | 70257  | <i>rps18</i> gene |
| 69    | 70173  | F | 69    | 70215  | LSC:IG            |
| 51    | 70191  | F | 51    | 70257  | LSC:IG            |
| 49    | 85925  | F | 49    | 85949  | LSC:IG            |
| 30750 | 88838  | P | 30750 | 132282 | IR                |
| 133   | 89124  | F | 133   | 89146  | IR:IG             |
| 133   | 89124  | P | 133   | 162591 | IR:IG             |
| 111   | 89124  | F | 111   | 89168  | IR:IG             |
| 111   | 89124  | P | 111   | 162591 | IR:IG             |
| 89    | 89124  | F | 89    | 89190  | IR:IG             |
| 89    | 89124  | P | 89    | 162591 | IR:IG             |
| 67    | 89124  | F | 67    | 89212  | IR:IG             |
| 67    | 89124  | P | 67    | 162591 | IR:IG             |
| 45    | 89124  | F | 45    | 89234  | IR:IG             |
| 45    | 89124  | P | 45    | 162591 | IR:IG             |
| 133   | 89146  | P | 133   | 162613 | IR:IG             |
| 111   | 89168  | P | 111   | 162635 | IR:IG             |
| 89    | 89190  | P | 89    | 162657 | IR:IG             |
| 67    | 89212  | P | 67    | 162679 | IR:IG             |
| 45    | 89234  | P | 45    | 162701 | IR:IG             |
| 44    | 95383  | F | 44    | 95404  | <i>ycf2</i> gene  |
| 44    | 95383  | P | 44    | 156422 | <i>ycf2</i> gene  |
| 44    | 95404  | P | 44    | 156443 | <i>ycf2</i> gene  |
| 48    | 95445  | F | 48    | 95493  | <i>ycf2</i> gene  |
| 48    | 95445  | P | 48    | 156329 | <i>ycf2</i> gene  |
| 32    | 95461  | F | 32    | 95509  | <i>ycf2</i> gene  |
| 32    | 95461  | P | 32    | 156329 | <i>ycf2</i> gene  |
| 48    | 95493  | P | 48    | 156377 | <i>ycf2</i> gene  |
| 32    | 95509  | P | 32    | 156377 | <i>ycf2</i> gene  |
| 56    | 95555  | F | 56    | 113181 | <i>ycf2</i> gene  |
| 56    | 95555  | P | 56    | 138633 | <i>ycf2</i> gene  |
| 42    | 101040 | F | 42    | 130040 | IR:IG             |
| 56    | 111466 | F | 56    | 111488 | IR:IG             |
| 56    | 111466 | P | 56    | 140326 | IR:IG             |
| 34    | 111466 | F | 34    | 111510 | IR:IG             |
| 34    | 111466 | P | 34    | 140326 | IR:IG             |
| 56    | 111488 | P | 56    | 140348 | IR:IG             |

|     |        |   |     |        |       |
|-----|--------|---|-----|--------|-------|
| 34  | 111510 | P | 34  | 140370 | IR:IG |
| 139 | 111649 | F | 139 | 111925 | IR:IG |
| 139 | 111649 | P | 139 | 139806 | IR:IG |
| 79  | 111649 | F | 79  | 112181 | IR:IG |
| 79  | 111649 | P | 79  | 139610 | IR:IG |
| 51  | 111649 | F | 51  | 111812 | IR:IG |
| 51  | 111649 | F | 51  | 112068 | IR:IG |
| 51  | 111649 | F | 51  | 112264 | IR:IG |
| 51  | 111649 | P | 51  | 139555 | IR:IG |
| 51  | 111649 | P | 51  | 139751 | IR:IG |
| 51  | 111649 | P | 51  | 140007 | IR:IG |
| 78  | 111650 | F | 78  | 111843 | IR:IG |
| 78  | 111650 | F | 78  | 112099 | IR:IG |
| 78  | 111650 | P | 78  | 139693 | IR:IG |
| 78  | 111650 | P | 78  | 139949 | IR:IG |
| 114 | 111674 | F | 114 | 111694 | IR:IG |
| 114 | 111674 | P | 114 | 140062 | IR:IG |
| 94  | 111674 | F | 94  | 111714 | IR:IG |
| 94  | 111674 | F | 94  | 111970 | IR:IG |
| 94  | 111674 | P | 94  | 139806 | IR:IG |
| 94  | 111674 | P | 94  | 140062 | IR:IG |
| 74  | 111674 | F | 74  | 111734 | IR:IG |
| 74  | 111674 | F | 74  | 111990 | IR:IG |
| 74  | 111674 | P | 74  | 139806 | IR:IG |
| 74  | 111674 | P | 74  | 140062 | IR:IG |
| 54  | 111674 | F | 54  | 111754 | IR:IG |
| 54  | 111674 | F | 54  | 112010 | IR:IG |
| 54  | 111674 | P | 54  | 139806 | IR:IG |
| 54  | 111674 | P | 54  | 140062 | IR:IG |
| 34  | 111674 | F | 34  | 111774 | IR:IG |
| 34  | 111674 | F | 34  | 111887 | IR:IG |
| 34  | 111674 | F | 34  | 112030 | IR:IG |
| 34  | 111674 | F | 34  | 112143 | IR:IG |
| 34  | 111674 | F | 34  | 112226 | IR:IG |
| 34  | 111674 | P | 34  | 139610 | IR:IG |
| 34  | 111674 | P | 34  | 139693 | IR:IG |
| 34  | 111674 | P | 34  | 139806 | IR:IG |
| 34  | 111674 | P | 34  | 139949 | IR:IG |
| 34  | 111674 | P | 34  | 140062 | IR:IG |
| 48  | 111680 | F | 48  | 111873 | IR:IG |
| 48  | 111680 | F | 48  | 112129 | IR:IG |
| 48  | 111680 | F | 48  | 112212 | IR:IG |
| 48  | 111680 | P | 48  | 139610 | IR:IG |
| 48  | 111680 | P | 48  | 139693 | IR:IG |

|     |        |   |     |        |       |
|-----|--------|---|-----|--------|-------|
| 48  | 111680 | P | 48  | 139949 | IR:IG |
| 103 | 111685 | F | 103 | 111961 | IR:IG |
| 103 | 111685 | P | 103 | 139806 | IR:IG |
| 32  | 111688 | F | 32  | 111801 | IR:IG |
| 32  | 111688 | F | 32  | 111914 | IR:IG |
| 32  | 111688 | F | 32  | 112057 | IR:IG |
| 32  | 111688 | F | 32  | 112170 | IR:IG |
| 32  | 111688 | F | 32  | 112253 | IR:IG |
| 32  | 111688 | P | 32  | 139585 | IR:IG |
| 32  | 111688 | P | 32  | 139668 | IR:IG |
| 32  | 111688 | P | 32  | 139781 | IR:IG |
| 32  | 111688 | P | 32  | 139924 | IR:IG |
| 32  | 111688 | P | 32  | 140037 | IR:IG |
| 114 | 111694 | P | 114 | 140082 | IR:IG |
| 54  | 111694 | F | 54  | 111867 | IR:IG |
| 54  | 111694 | F | 54  | 112123 | IR:IG |
| 54  | 111694 | F | 54  | 112206 | IR:IG |
| 54  | 111694 | P | 54  | 139610 | IR:IG |
| 54  | 111694 | P | 54  | 139693 | IR:IG |
| 54  | 111694 | P | 54  | 139949 | IR:IG |
| 299 | 111705 | F | 299 | 111961 | IR:IG |
| 299 | 111705 | P | 299 | 139610 | IR:IG |
| 32  | 111708 | F | 32  | 111801 | IR:IG |
| 32  | 111708 | F | 32  | 111914 | IR:IG |
| 32  | 111708 | F | 32  | 112057 | IR:IG |
| 32  | 111708 | F | 32  | 112170 | IR:IG |
| 32  | 111708 | F | 32  | 112253 | IR:IG |
| 32  | 111708 | P | 32  | 139585 | IR:IG |
| 32  | 111708 | P | 32  | 139668 | IR:IG |
| 32  | 111708 | P | 32  | 139781 | IR:IG |
| 32  | 111708 | P | 32  | 139924 | IR:IG |
| 32  | 111708 | P | 32  | 140037 | IR:IG |
| 94  | 111714 | P | 94  | 140102 | IR:IG |
| 94  | 111714 | F | 94  | 111950 | IR:IG |
| 94  | 111714 | P | 94  | 139826 | IR:IG |
| 54  | 111714 | F | 54  | 111867 | IR:IG |
| 54  | 111714 | F | 54  | 112123 | IR:IG |
| 54  | 111714 | F | 54  | 112206 | IR:IG |
| 54  | 111714 | P | 54  | 139610 | IR:IG |
| 54  | 111714 | P | 54  | 139693 | IR:IG |
| 54  | 111714 | P | 54  | 139949 | IR:IG |
| 32  | 111728 | F | 32  | 111801 | IR:IG |
| 32  | 111728 | F | 32  | 111914 | IR:IG |
| 32  | 111728 | F | 32  | 112057 | IR:IG |

|     |        |   |     |        |       |
|-----|--------|---|-----|--------|-------|
| 32  | 111728 | F | 32  | 112170 | IR:IG |
| 32  | 111728 | F | 32  | 112253 | IR:IG |
| 32  | 111728 | P | 32  | 139585 | IR:IG |
| 32  | 111728 | P | 32  | 139668 | IR:IG |
| 32  | 111728 | P | 32  | 139781 | IR:IG |
| 32  | 111728 | P | 32  | 139924 | IR:IG |
| 32  | 111728 | P | 32  | 140037 | IR:IG |
| 74  | 111734 | P | 74  | 140122 | IR:IG |
| 74  | 111734 | F | 74  | 111950 | IR:IG |
| 74  | 111734 | P | 74  | 139846 | IR:IG |
| 54  | 111734 | F | 54  | 111867 | IR:IG |
| 54  | 111734 | F | 54  | 112123 | IR:IG |
| 54  | 111734 | F | 54  | 112206 | IR:IG |
| 54  | 111734 | P | 54  | 139610 | IR:IG |
| 54  | 111734 | P | 54  | 139693 | IR:IG |
| 54  | 111734 | P | 54  | 139949 | IR:IG |
| 32  | 111748 | F | 32  | 111801 | IR:IG |
| 32  | 111748 | F | 32  | 111914 | IR:IG |
| 32  | 111748 | F | 32  | 112057 | IR:IG |
| 32  | 111748 | F | 32  | 112170 | IR:IG |
| 32  | 111748 | F | 32  | 112253 | IR:IG |
| 32  | 111748 | P | 32  | 139585 | IR:IG |
| 32  | 111748 | P | 32  | 139668 | IR:IG |
| 32  | 111748 | P | 32  | 139781 | IR:IG |
| 32  | 111748 | P | 32  | 139924 | IR:IG |
| 32  | 111748 | P | 32  | 140037 | IR:IG |
| 111 | 111754 | F | 111 | 112206 | IR:IG |
| 111 | 111754 | P | 111 | 139553 | IR:IG |
| 109 | 111754 | F | 109 | 111867 | IR:IG |
| 109 | 111754 | F | 109 | 112123 | IR:IG |
| 109 | 111754 | P | 109 | 139638 | IR:IG |
| 109 | 111754 | P | 109 | 139894 | IR:IG |
| 54  | 111754 | P | 54  | 140142 | IR:IG |
| 54  | 111754 | F | 54  | 111950 | IR:IG |
| 54  | 111754 | P | 54  | 139866 | IR:IG |
| 32  | 111768 | F | 32  | 111801 | IR:IG |
| 32  | 111768 | F | 32  | 111914 | IR:IG |
| 32  | 111768 | F | 32  | 112057 | IR:IG |
| 32  | 111768 | F | 32  | 112170 | IR:IG |
| 32  | 111768 | F | 32  | 112253 | IR:IG |
| 32  | 111768 | P | 32  | 139585 | IR:IG |
| 32  | 111768 | P | 32  | 139668 | IR:IG |
| 32  | 111768 | P | 32  | 139781 | IR:IG |
| 32  | 111768 | P | 32  | 139924 | IR:IG |

|     |        |   |     |        |       |
|-----|--------|---|-----|--------|-------|
| 32  | 111768 | P | 32  | 140037 | IR:IG |
| 34  | 111774 | P | 34  | 140162 | IR:IG |
| 32  | 111801 | F | 32  | 111881 | IR:IG |
| 32  | 111801 | F | 32  | 111964 | IR:IG |
| 32  | 111801 | F | 32  | 111984 | IR:IG |
| 32  | 111801 | F | 32  | 112004 | IR:IG |
| 32  | 111801 | F | 32  | 112024 | IR:IG |
| 32  | 111801 | F | 32  | 112137 | IR:IG |
| 32  | 111801 | F | 32  | 112220 | IR:IG |
| 32  | 111801 | P | 32  | 139618 | IR:IG |
| 32  | 111801 | P | 32  | 139701 | IR:IG |
| 32  | 111801 | P | 32  | 139814 | IR:IG |
| 32  | 111801 | P | 32  | 139834 | IR:IG |
| 32  | 111801 | P | 32  | 139854 | IR:IG |
| 32  | 111801 | P | 32  | 139874 | IR:IG |
| 32  | 111801 | P | 32  | 139957 | IR:IG |
| 56  | 111807 | F | 56  | 111837 | IR:IG |
| 56  | 111807 | F | 56  | 112093 | IR:IG |
| 56  | 111807 | P | 56  | 139721 | IR:IG |
| 56  | 111807 | P | 56  | 139977 | IR:IG |
| 51  | 111812 | P | 51  | 140170 | IR:IG |
| 139 | 111837 | F | 139 | 112176 | IR:IG |
| 139 | 111837 | P | 139 | 139555 | IR:IG |
| 84  | 111837 | F | 84  | 111920 | IR:IG |
| 84  | 111837 | P | 84  | 139866 | IR:IG |
| 56  | 111837 | F | 56  | 112063 | IR:IG |
| 56  | 111837 | F | 56  | 112259 | IR:IG |
| 56  | 111837 | P | 56  | 139555 | IR:IG |
| 56  | 111837 | P | 56  | 139751 | IR:IG |
| 56  | 111837 | P | 56  | 140007 | IR:IG |
| 78  | 111843 | P | 78  | 140142 | IR:IG |
| 109 | 111867 | F | 109 | 112010 | IR:IG |
| 109 | 111867 | P | 109 | 139751 | IR:IG |
| 109 | 111867 | P | 109 | 140007 | IR:IG |
| 54  | 111867 | F | 54  | 111970 | IR:IG |
| 54  | 111867 | F | 54  | 111990 | IR:IG |
| 54  | 111867 | P | 54  | 139826 | IR:IG |
| 54  | 111867 | P | 54  | 139846 | IR:IG |
| 54  | 111867 | P | 54  | 140082 | IR:IG |
| 54  | 111867 | P | 54  | 140102 | IR:IG |
| 54  | 111867 | P | 54  | 140122 | IR:IG |
| 48  | 111873 | P | 48  | 140142 | IR:IG |
| 34  | 111887 | P | 34  | 140162 | IR:IG |
| 84  | 111920 | F | 84  | 112093 | IR:IG |

|     |        |   |     |        |       |
|-----|--------|---|-----|--------|-------|
| 84  | 111920 | P | 84  | 139693 | IR:IG |
| 84  | 111920 | P | 84  | 139949 | IR:IG |
| 139 | 111925 | P | 139 | 140082 | IR:IG |
| 94  | 111950 | F | 94  | 111970 | IR:IG |
| 94  | 111950 | P | 94  | 139806 | IR:IG |
| 94  | 111950 | P | 94  | 140062 | IR:IG |
| 74  | 111950 | F | 74  | 111990 | IR:IG |
| 74  | 111950 | P | 74  | 139806 | IR:IG |
| 74  | 111950 | P | 74  | 140062 | IR:IG |
| 54  | 111950 | F | 54  | 112010 | IR:IG |
| 54  | 111950 | P | 54  | 139806 | IR:IG |
| 54  | 111950 | P | 54  | 140062 | IR:IG |
| 299 | 111961 | P | 299 | 139866 | IR:IG |
| 103 | 111961 | P | 103 | 140082 | IR:IG |
| 94  | 111970 | P | 94  | 140102 | IR:IG |
| 94  | 111970 | P | 94  | 139826 | IR:IG |
| 54  | 111970 | F | 54  | 112123 | IR:IG |
| 54  | 111970 | F | 54  | 112206 | IR:IG |
| 54  | 111970 | P | 54  | 139610 | IR:IG |
| 54  | 111970 | P | 54  | 139693 | IR:IG |
| 54  | 111970 | P | 54  | 139949 | IR:IG |
| 74  | 111990 | P | 74  | 140122 | IR:IG |
| 74  | 111990 | P | 74  | 139846 | IR:IG |
| 54  | 111990 | F | 54  | 112123 | IR:IG |
| 54  | 111990 | F | 54  | 112206 | IR:IG |
| 54  | 111990 | P | 54  | 139610 | IR:IG |
| 54  | 111990 | P | 54  | 139693 | IR:IG |
| 54  | 111990 | P | 54  | 139949 | IR:IG |
| 111 | 112010 | F | 111 | 112206 | IR:IG |
| 111 | 112010 | P | 111 | 139553 | IR:IG |
| 109 | 112010 | F | 109 | 112123 | IR:IG |
| 109 | 112010 | P | 109 | 139638 | IR:IG |
| 109 | 112010 | P | 109 | 139894 | IR:IG |
| 54  | 112010 | P | 54  | 140142 | IR:IG |
| 54  | 112010 | P | 54  | 139866 | IR:IG |
| 34  | 112030 | P | 34  | 140162 | IR:IG |
| 56  | 112063 | F | 56  | 112093 | IR:IG |
| 56  | 112063 | P | 56  | 139721 | IR:IG |
| 56  | 112063 | P | 56  | 139977 | IR:IG |
| 51  | 112068 | P | 51  | 140170 | IR:IG |
| 139 | 112093 | F | 139 | 112176 | IR:IG |
| 139 | 112093 | P | 139 | 139555 | IR:IG |
| 84  | 112093 | P | 84  | 139866 | IR:IG |
| 56  | 112093 | F | 56  | 112259 | IR:IG |

|     |        |   |     |        |                  |
|-----|--------|---|-----|--------|------------------|
| 56  | 112093 | P | 56  | 139555 | IR:IG            |
| 56  | 112093 | P | 56  | 139751 | IR:IG            |
| 56  | 112093 | P | 56  | 140007 | IR:IG            |
| 78  | 112099 | P | 78  | 140142 | IR:IG            |
| 109 | 112123 | P | 109 | 139751 | IR:IG            |
| 109 | 112123 | P | 109 | 140007 | IR:IG            |
| 54  | 112123 | P | 54  | 139826 | IR:IG            |
| 54  | 112123 | P | 54  | 139846 | IR:IG            |
| 54  | 112123 | P | 54  | 140082 | IR:IG            |
| 54  | 112123 | P | 54  | 140102 | IR:IG            |
| 54  | 112123 | P | 54  | 140122 | IR:IG            |
| 48  | 112129 | P | 48  | 140142 | IR:IG            |
| 34  | 112143 | P | 34  | 140162 | IR:IG            |
| 139 | 112176 | P | 139 | 139638 | IR:IG            |
| 139 | 112176 | P | 139 | 139894 | IR:IG            |
| 79  | 112181 | P | 79  | 140142 | IR:IG            |
| 111 | 112206 | P | 111 | 139749 | IR:IG            |
| 111 | 112206 | P | 111 | 140005 | IR:IG            |
| 54  | 112206 | P | 54  | 139826 | IR:IG            |
| 54  | 112206 | P | 54  | 139846 | IR:IG            |
| 54  | 112206 | P | 54  | 140082 | IR:IG            |
| 54  | 112206 | P | 54  | 140102 | IR:IG            |
| 54  | 112206 | P | 54  | 140122 | IR:IG            |
| 48  | 112212 | P | 48  | 140142 | IR:IG            |
| 34  | 112226 | P | 34  | 140162 | IR:IG            |
| 56  | 112259 | P | 56  | 139721 | IR:IG            |
| 56  | 112259 | P | 56  | 139977 | IR:IG            |
| 51  | 112264 | P | 51  | 140170 | IR:IG            |
| 56  | 113181 | P | 56  | 156259 | <i>ycfI</i> gene |
| 48  | 116756 | F | 48  | 116891 | <i>ycfI</i> gene |
| 48  | 116756 | P | 48  | 134931 | <i>ycfI</i> gene |
| 33  | 116771 | F | 33  | 116906 | <i>ycfI</i> gene |
| 33  | 116771 | P | 33  | 134931 | <i>ycfI</i> gene |
| 72  | 116783 | F | 72  | 116810 | <i>ycfI</i> gene |
| 72  | 116783 | P | 72  | 134988 | <i>ycfI</i> gene |
| 45  | 116783 | F | 45  | 116837 | <i>ycfI</i> gene |
| 45  | 116783 | P | 45  | 134988 | <i>ycfI</i> gene |
| 72  | 116810 | P | 72  | 135015 | <i>ycfI</i> gene |
| 45  | 116837 | P | 45  | 135042 | <i>ycfI</i> gene |
| 48  | 116891 | P | 48  | 135066 | <i>ycfI</i> gene |
| 33  | 116906 | P | 33  | 135066 | <i>ycfI</i> gene |
| 61  | 126576 | P | 61  | 126576 | SSC:IG           |
| 42  | 130040 | P | 42  | 150788 | <i>ndhA</i> gene |
| 48  | 134931 | F | 48  | 135066 | <i>ycfI</i> gene |

|     |        |   |     |        |                  |
|-----|--------|---|-----|--------|------------------|
| 72  | 134988 | F | 72  | 135015 | <i>ycfI</i> gene |
| 45  | 134988 | F | 45  | 135042 | <i>ycfI</i> gene |
| 50  | 135010 | F | 50  | 135037 | <i>ycfI</i> gene |
| 56  | 138633 | F | 56  | 156259 | <i>ycfI</i> gene |
| 111 | 139553 | F | 111 | 139749 | IR:IG            |
| 111 | 139553 | F | 111 | 140005 | IR:IG            |
| 139 | 139555 | F | 139 | 139638 | IR:IG            |
| 139 | 139555 | F | 139 | 139894 | IR:IG            |
| 56  | 139555 | F | 56  | 139721 | IR:IG            |
| 56  | 139555 | F | 56  | 139977 | IR:IG            |
| 51  | 139555 | F | 51  | 140170 | IR:IG            |
| 299 | 139610 | F | 299 | 139866 | IR:IG            |
| 79  | 139610 | F | 79  | 140142 | IR:IG            |
| 54  | 139610 | F | 54  | 139826 | IR:IG            |
| 54  | 139610 | F | 54  | 139846 | IR:IG            |
| 54  | 139610 | F | 54  | 140082 | IR:IG            |
| 54  | 139610 | F | 54  | 140102 | IR:IG            |
| 54  | 139610 | F | 54  | 140122 | IR:IG            |
| 34  | 139610 | F | 34  | 140162 | IR:IG            |
| 109 | 139638 | F | 109 | 139751 | IR:IG            |
| 109 | 139638 | F | 109 | 140007 | IR:IG            |
| 84  | 139693 | F | 84  | 139866 | IR:IG            |
| 78  | 139693 | F | 78  | 140142 | IR:IG            |
| 54  | 139693 | F | 54  | 139826 | IR:IG            |
| 54  | 139693 | F | 54  | 139846 | IR:IG            |
| 54  | 139693 | F | 54  | 140082 | IR:IG            |
| 54  | 139693 | F | 54  | 140102 | IR:IG            |
| 54  | 139693 | F | 54  | 140122 | IR:IG            |
| 34  | 139693 | F | 34  | 140162 | IR:IG            |
| 56  | 139721 | F | 56  | 139751 | IR:IG            |
| 56  | 139721 | F | 56  | 140007 | IR:IG            |
| 109 | 139751 | F | 109 | 139894 | IR:IG            |
| 56  | 139751 | F | 56  | 139977 | IR:IG            |
| 51  | 139751 | F | 51  | 140170 | IR:IG            |
| 139 | 139806 | F | 139 | 140082 | IR:IG            |
| 94  | 139806 | F | 94  | 140102 | IR:IG            |
| 94  | 139806 | F | 94  | 139826 | IR:IG            |
| 74  | 139806 | F | 74  | 140122 | IR:IG            |
| 74  | 139806 | F | 74  | 139846 | IR:IG            |
| 54  | 139806 | F | 54  | 140142 | IR:IG            |
| 54  | 139806 | F | 54  | 139866 | IR:IG            |
| 34  | 139806 | F | 34  | 140162 | IR:IG            |
| 94  | 139826 | F | 94  | 140062 | IR:IG            |
| 54  | 139826 | F | 54  | 139949 | IR:IG            |



|     |        |   |     |        |                  |
|-----|--------|---|-----|--------|------------------|
| 74  | 139846 | F | 74  | 140062 | IR:IG            |
| 54  | 139846 | F | 54  | 139949 | IR:IG            |
| 84  | 139866 | F | 84  | 139949 | IR:IG            |
| 54  | 139866 | F | 54  | 140062 | IR:IG            |
| 109 | 139894 | F | 109 | 140007 | IR:IG            |
| 78  | 139949 | F | 78  | 140142 | IR:IG            |
| 54  | 139949 | F | 54  | 140082 | IR:IG            |
| 54  | 139949 | F | 54  | 140102 | IR:IG            |
| 54  | 139949 | F | 54  | 140122 | IR:IG            |
| 34  | 139949 | F | 34  | 140162 | IR:IG            |
| 56  | 139977 | F | 56  | 140007 | IR:IG            |
| 51  | 140007 | F | 51  | 140170 | IR:IG            |
| 114 | 140062 | F | 114 | 140082 | IR:IG            |
| 94  | 140062 | F | 94  | 140102 | IR:IG            |
| 74  | 140062 | F | 74  | 140122 | IR:IG            |
| 54  | 140062 | F | 54  | 140142 | IR:IG            |
| 34  | 140062 | F | 34  | 140162 | IR:IG            |
| 56  | 140326 | F | 56  | 140348 | IR:IG            |
| 34  | 140326 | F | 34  | 140370 | IR:IG            |
| 48  | 156329 | F | 48  | 156377 | <i>ycf2</i> gene |
| 44  | 156422 | F | 44  | 156443 | <i>ycf2</i> gene |
| 133 | 162591 | F | 133 | 162613 | IR:IG            |
| 111 | 162591 | F | 111 | 162635 | IR:IG            |
| 89  | 162591 | F | 89  | 162657 | IR:IG            |
| 67  | 162591 | F | 67  | 162679 | IR:IG            |
| 45  | 162591 | F | 45  | 162701 | IR:IG            |

---
